# Supplementary material for: Origin and diversification of Aquilaria (Thymelaeaceae): inferences from a phylogenetic study based on matK sequences
Source: Research Square preprint supplement (doi:10.21203/rs.3.rs-4120659/v1), 2024-04-01
Supplement: Supplementary file 1 [file b5373f6f984d25e4d16887fb.docx]

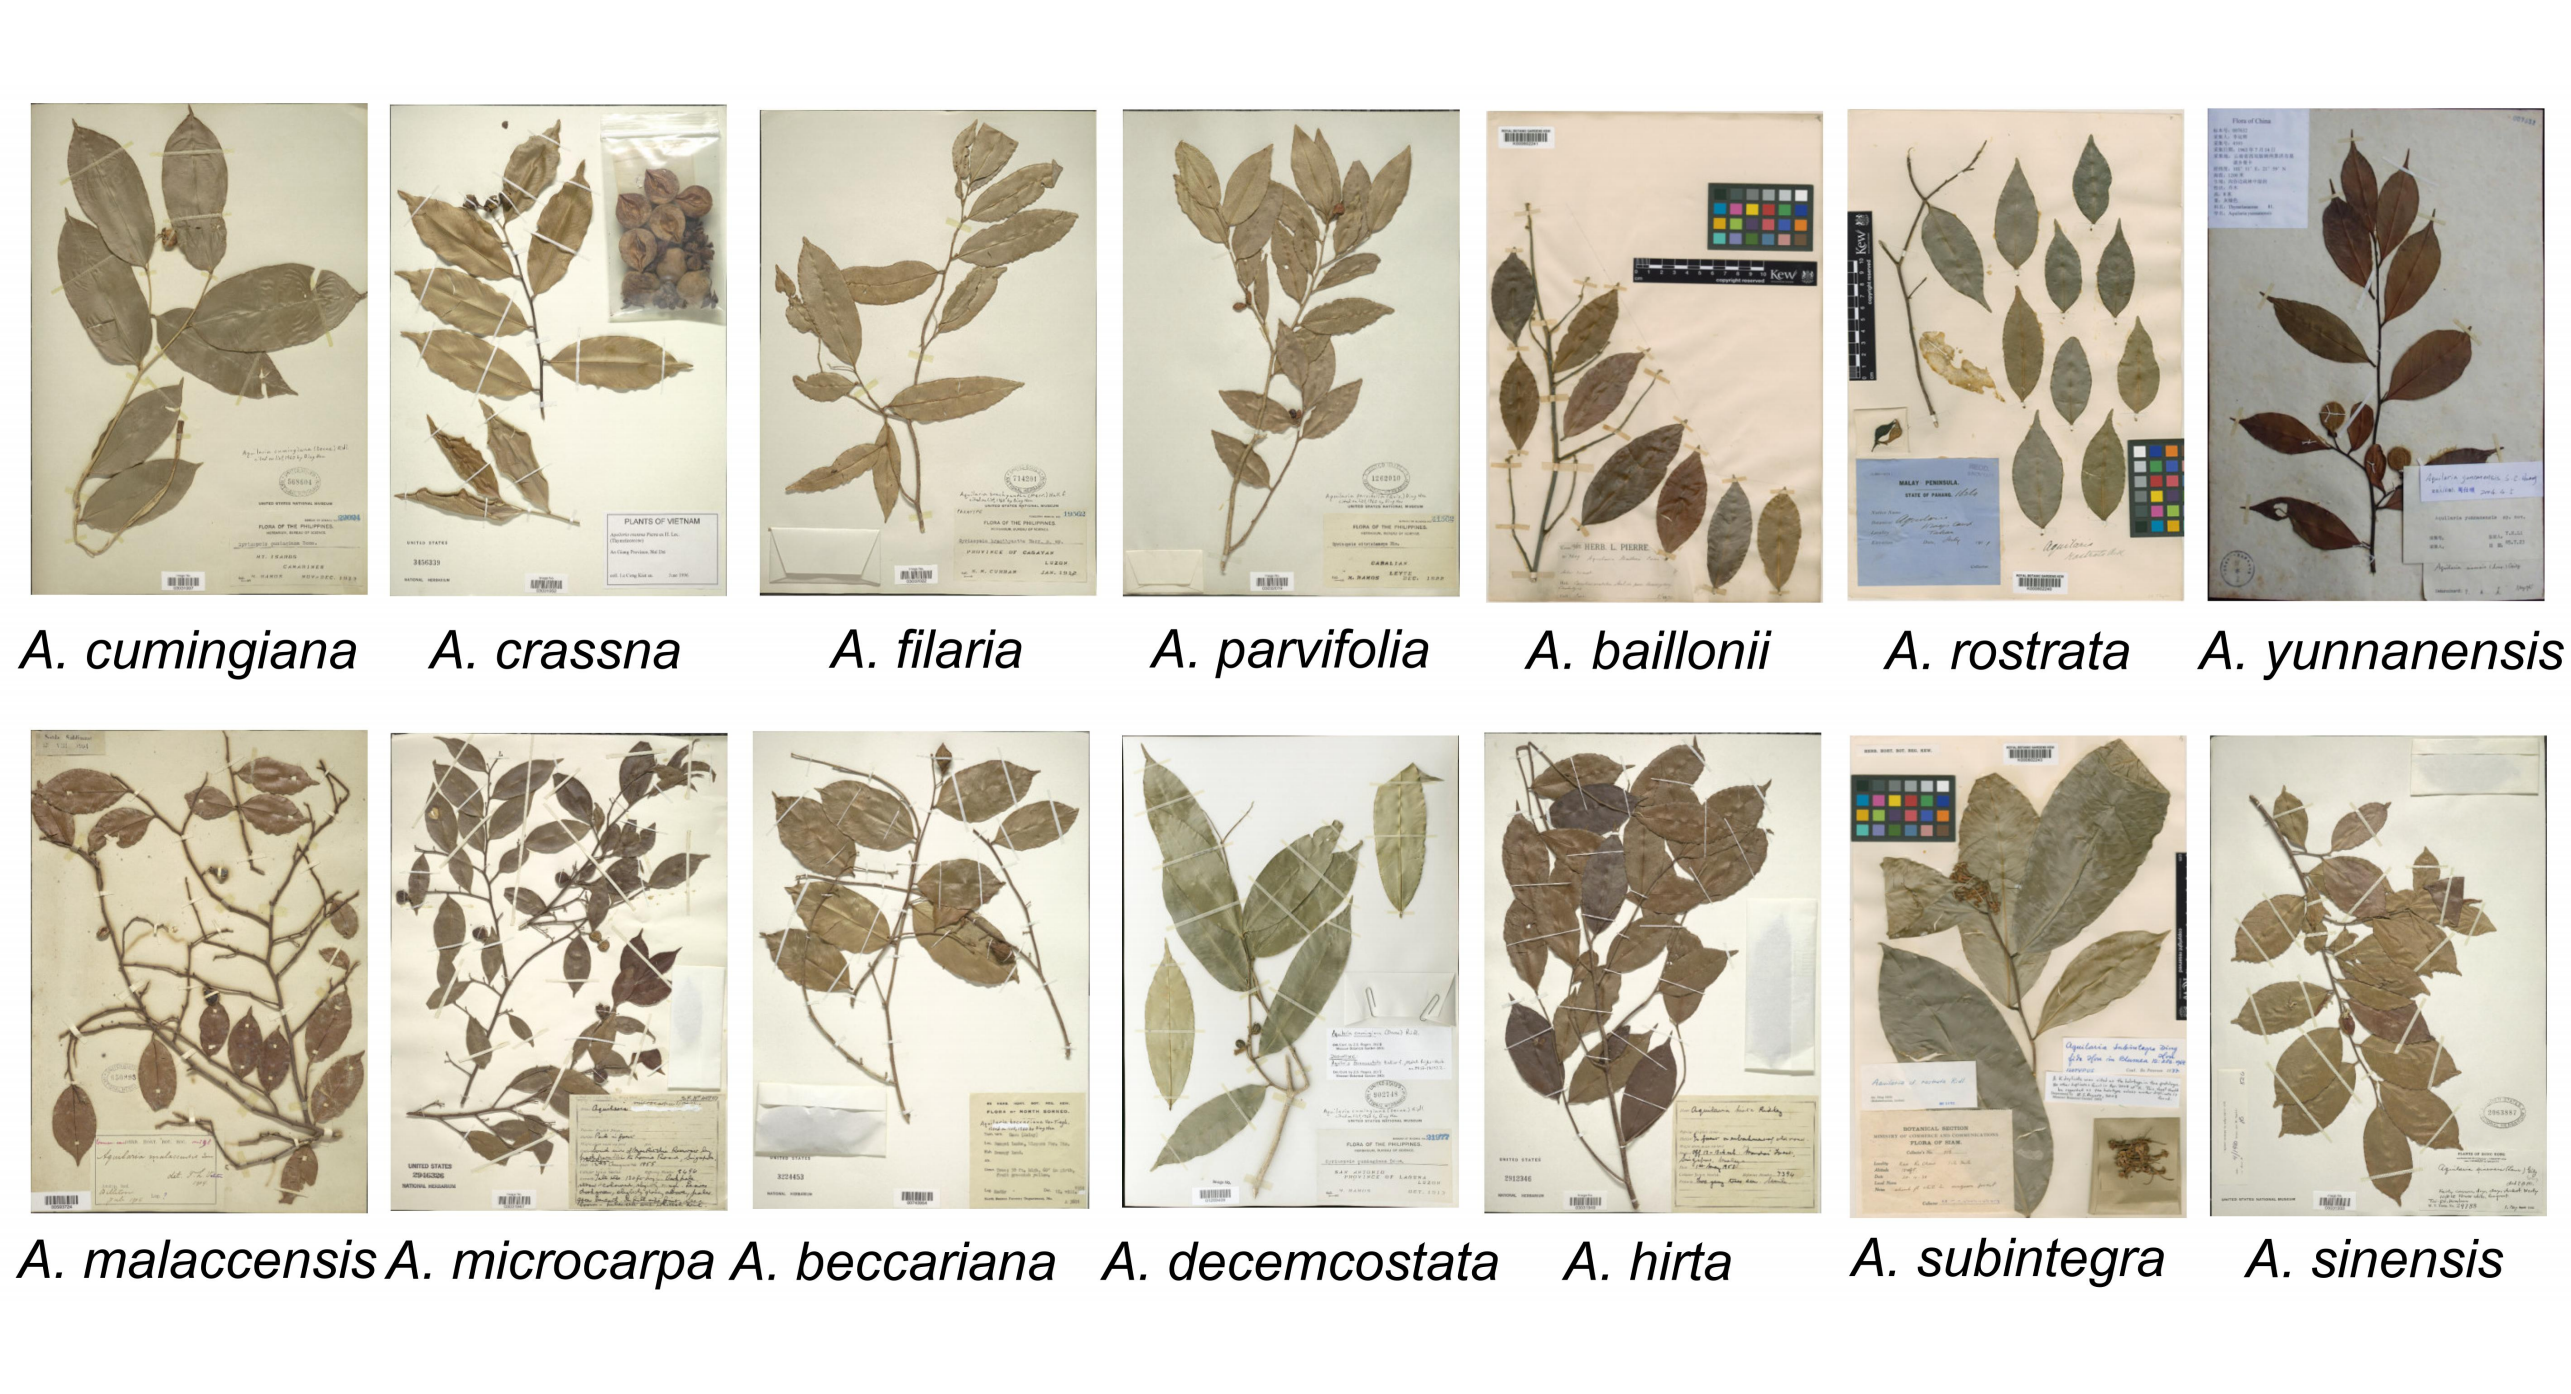


**Figure S1.** The plant specimens of 14 major agarwood producers in the genus *Aquilaria*.


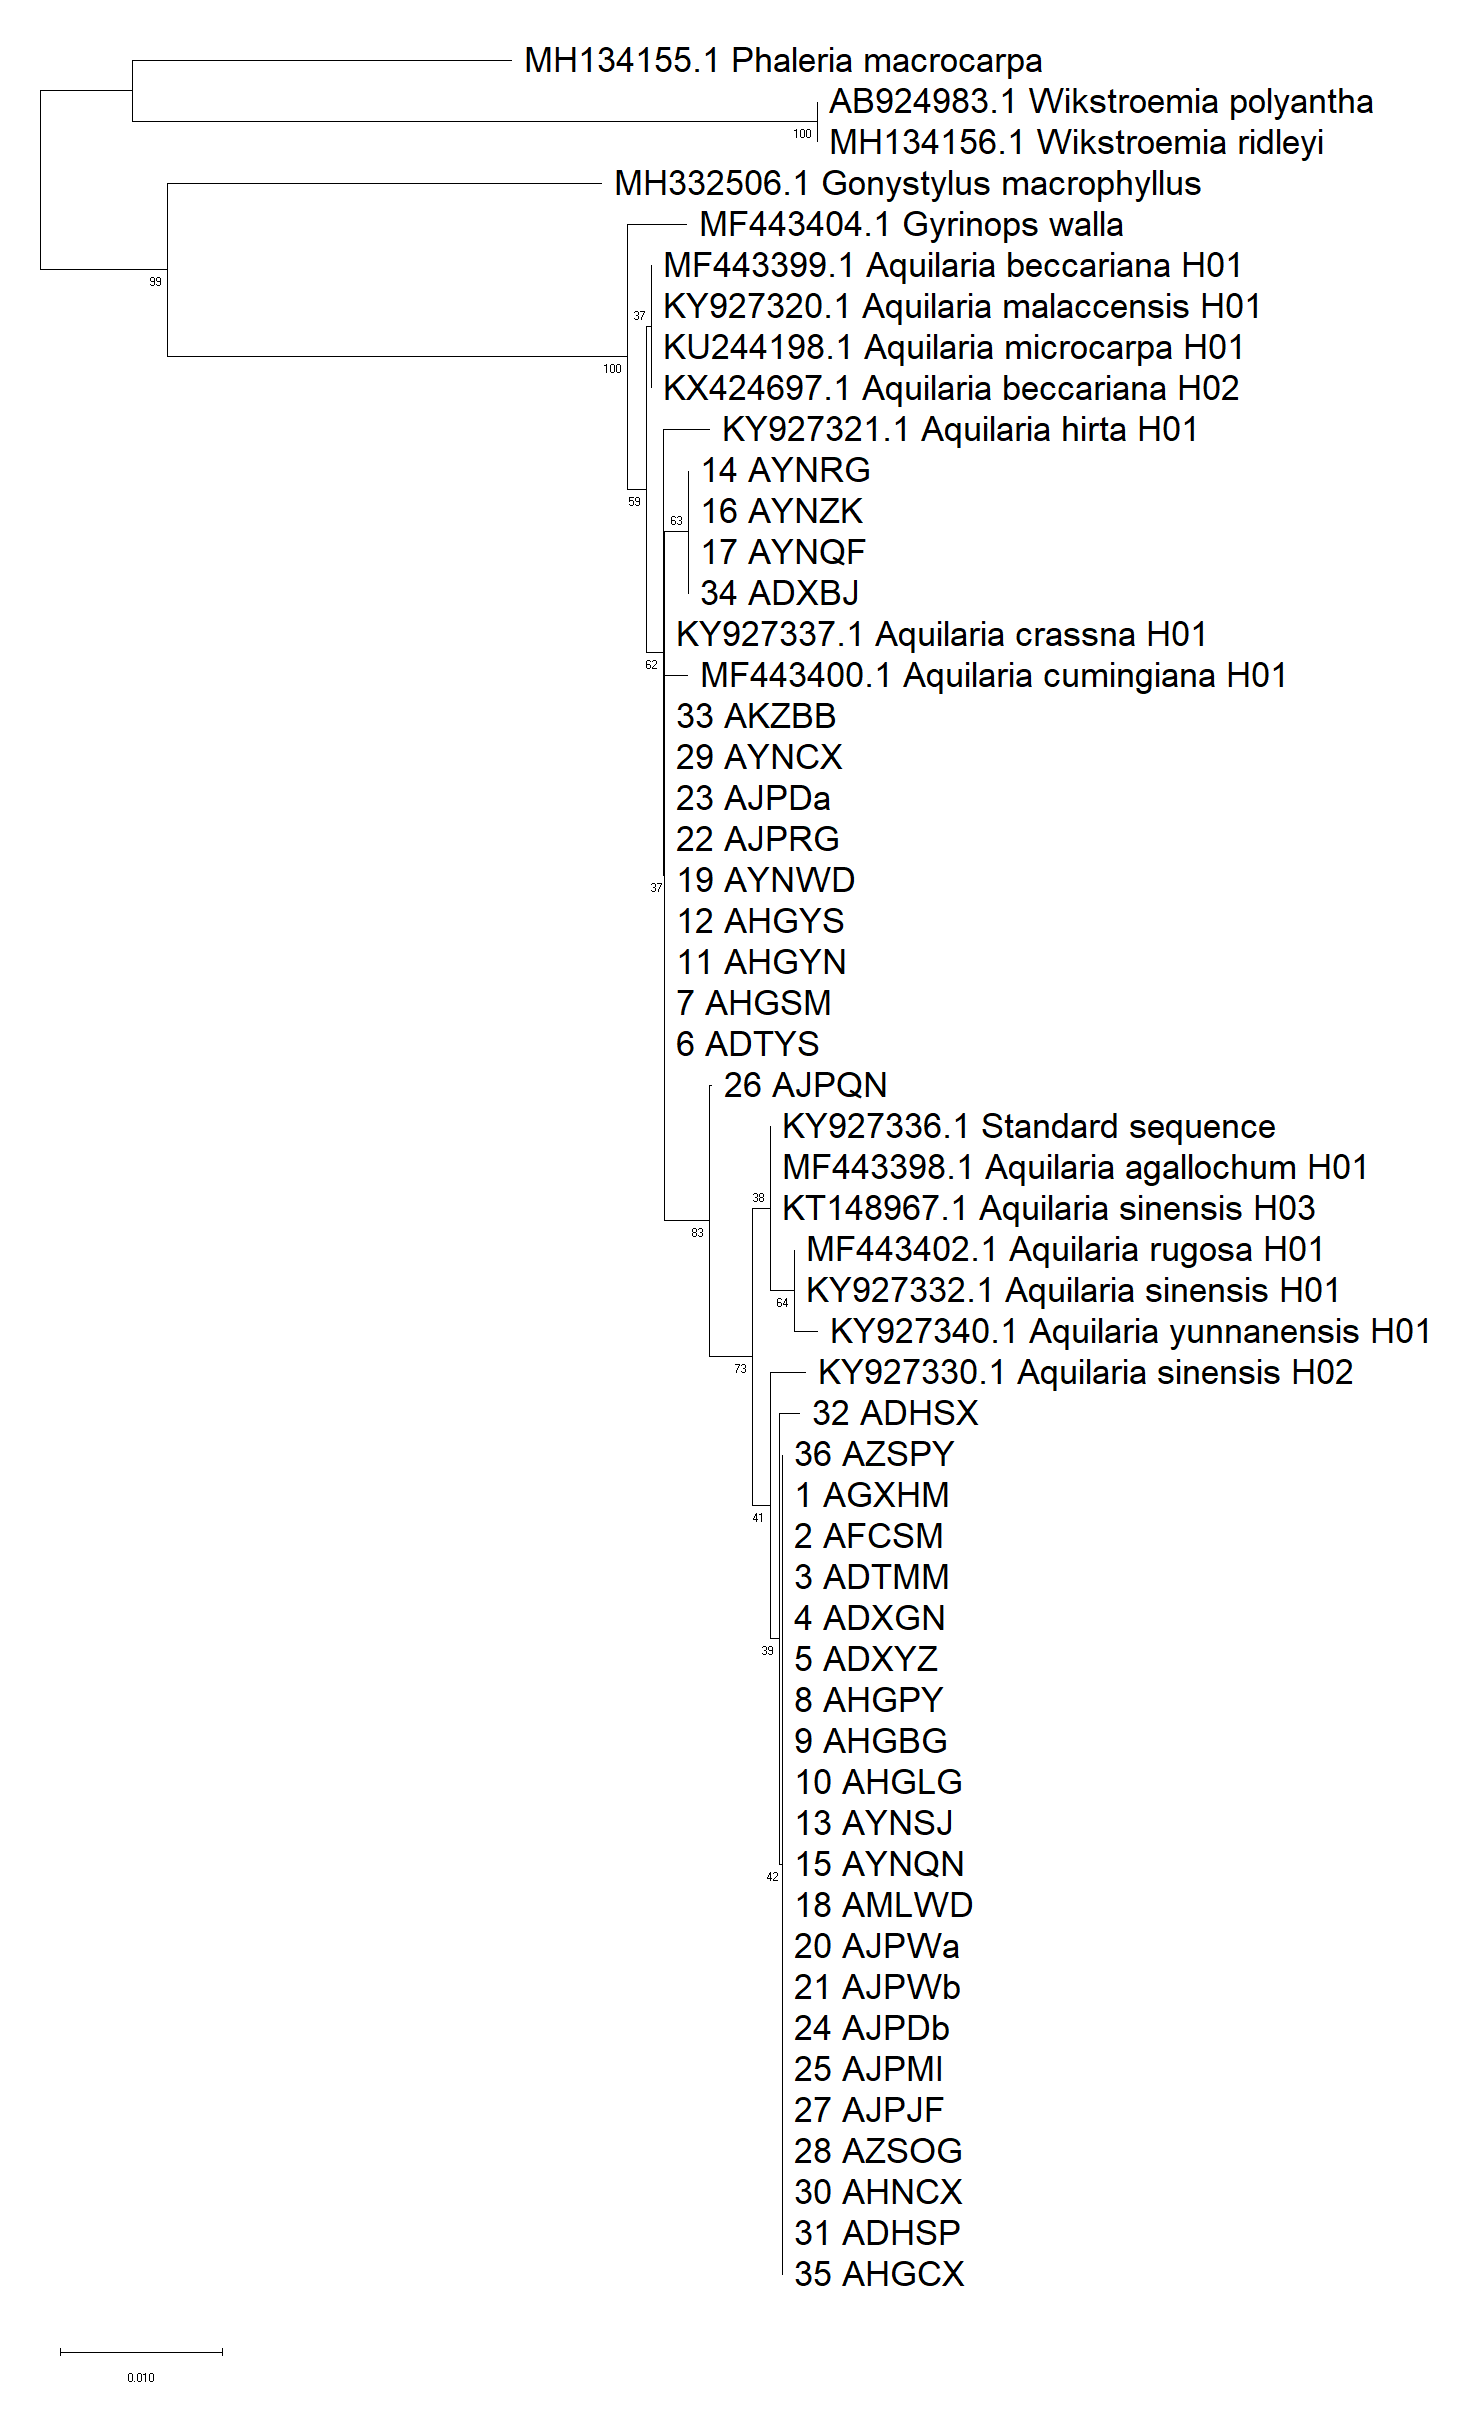


Chinese Mainland

Indochina

Malaysia


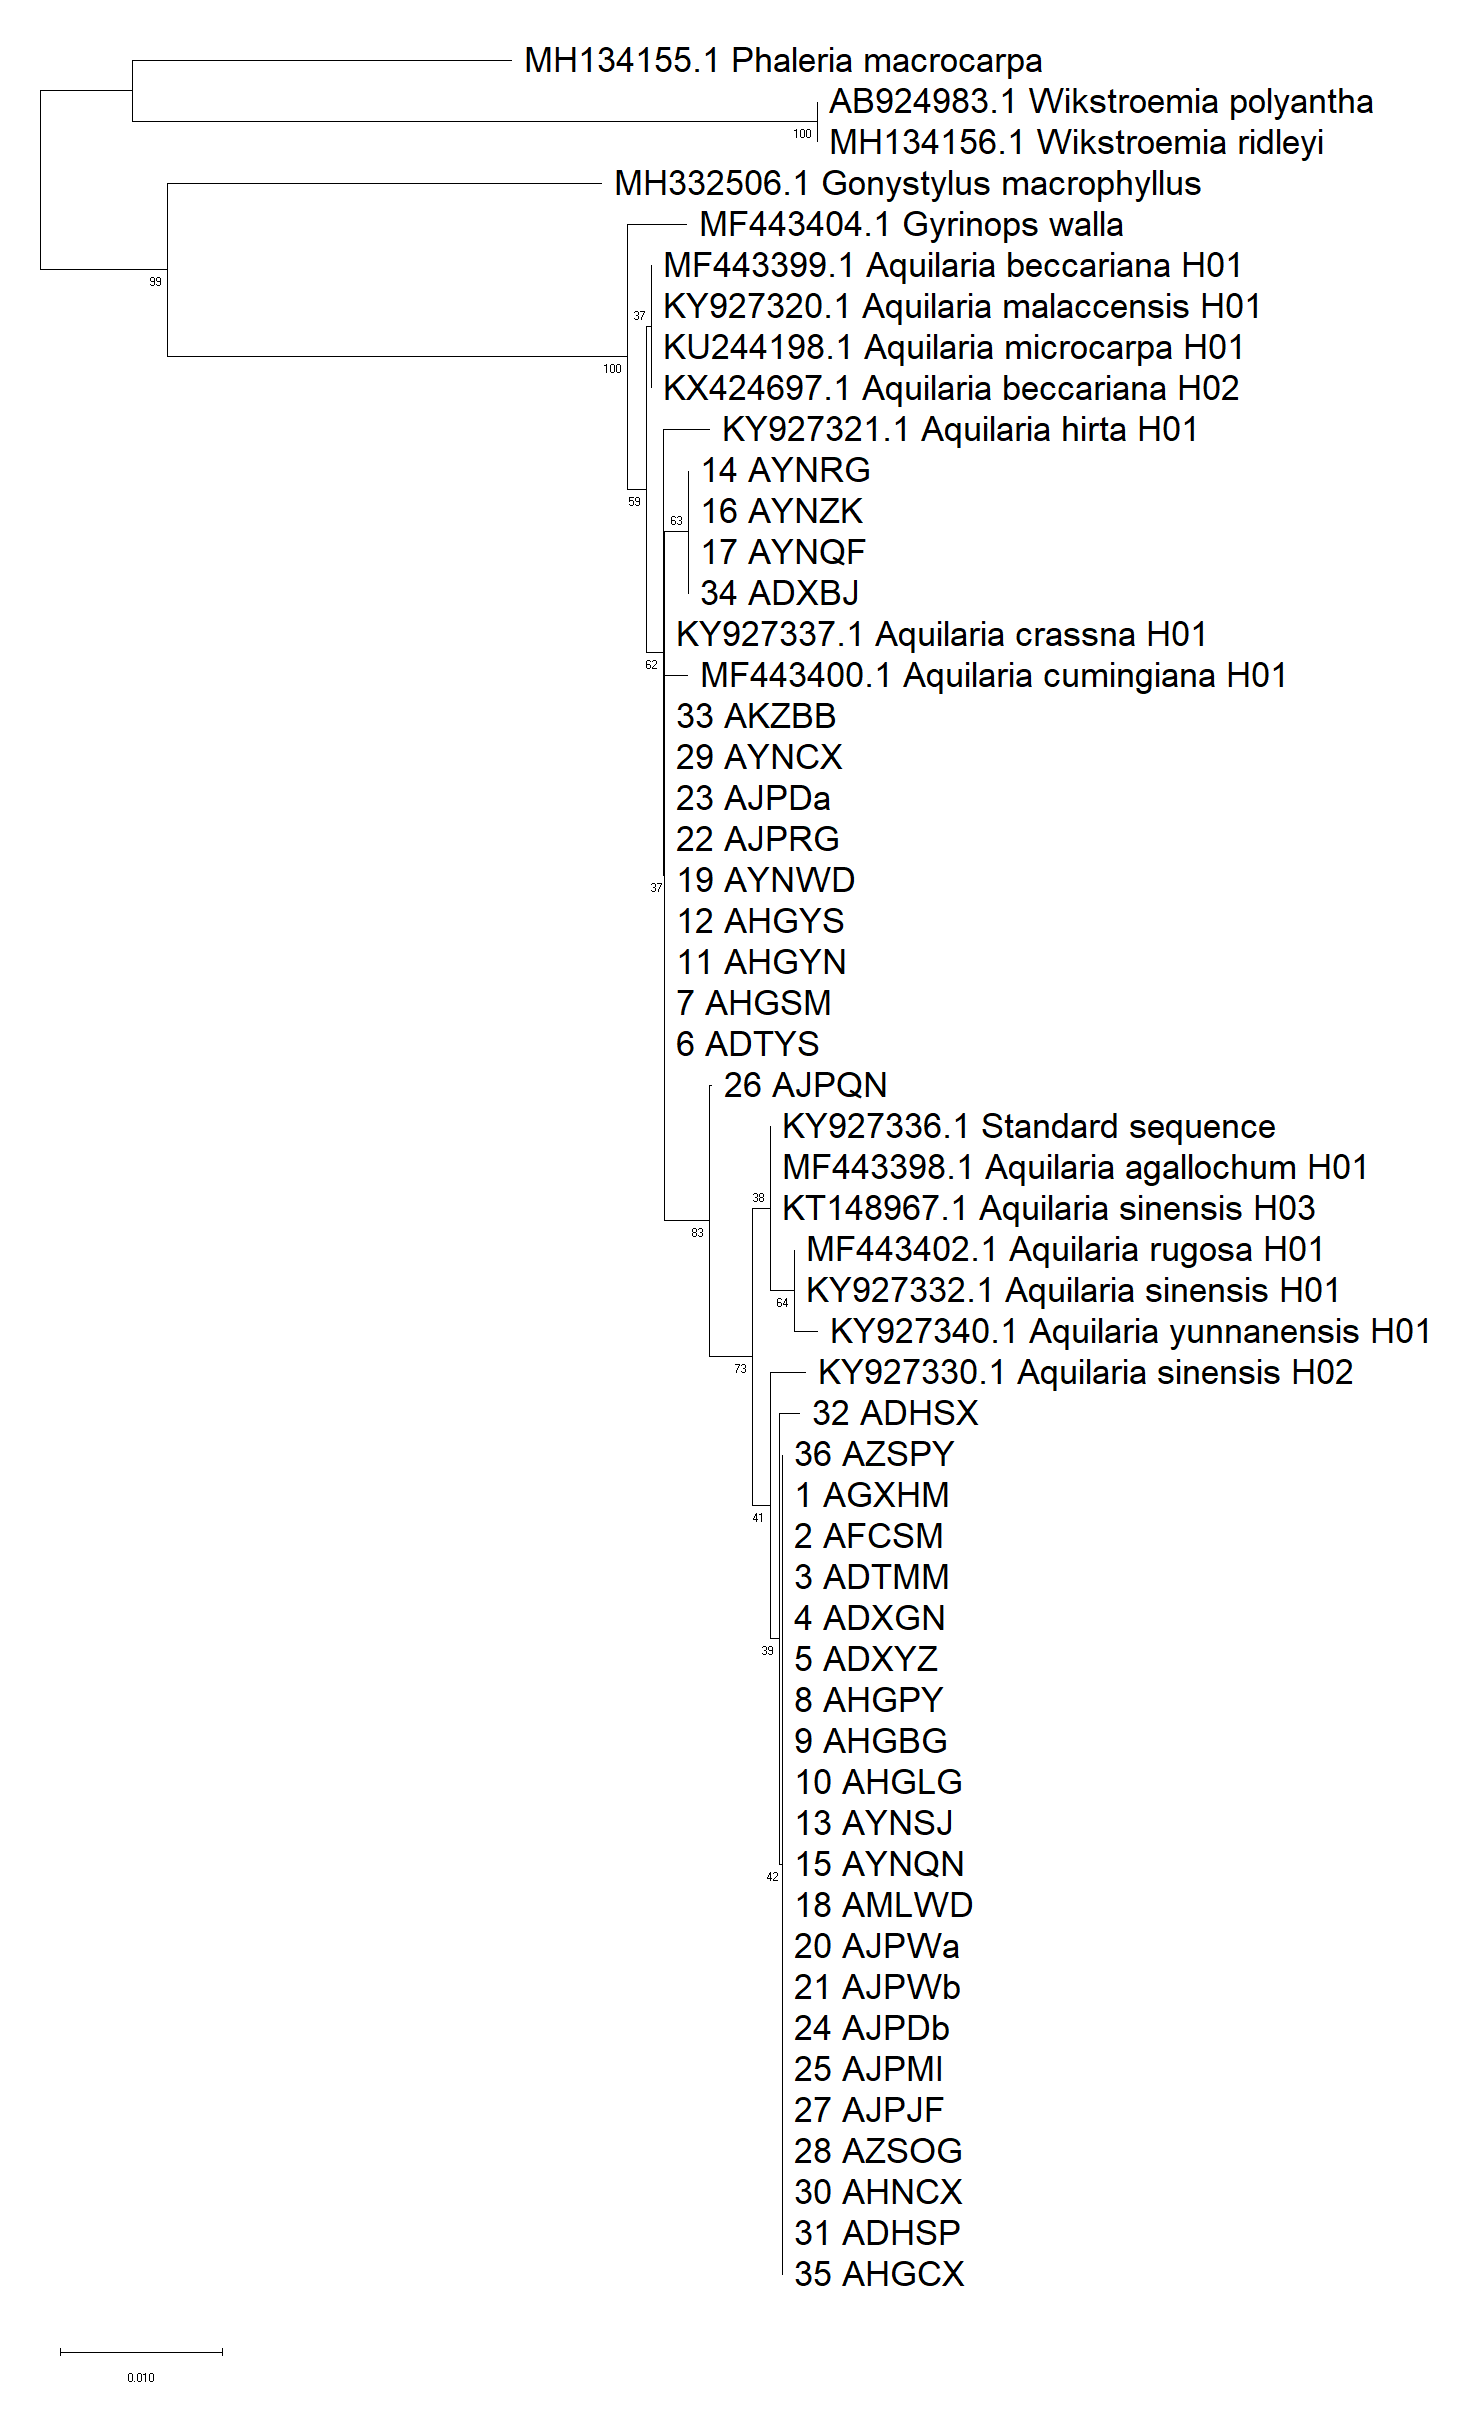


0.01

**Figure S2.** Phylogenetic analysis and systematic cluster analysis for agarwood products and *Aquilaria* using matK sequence only.


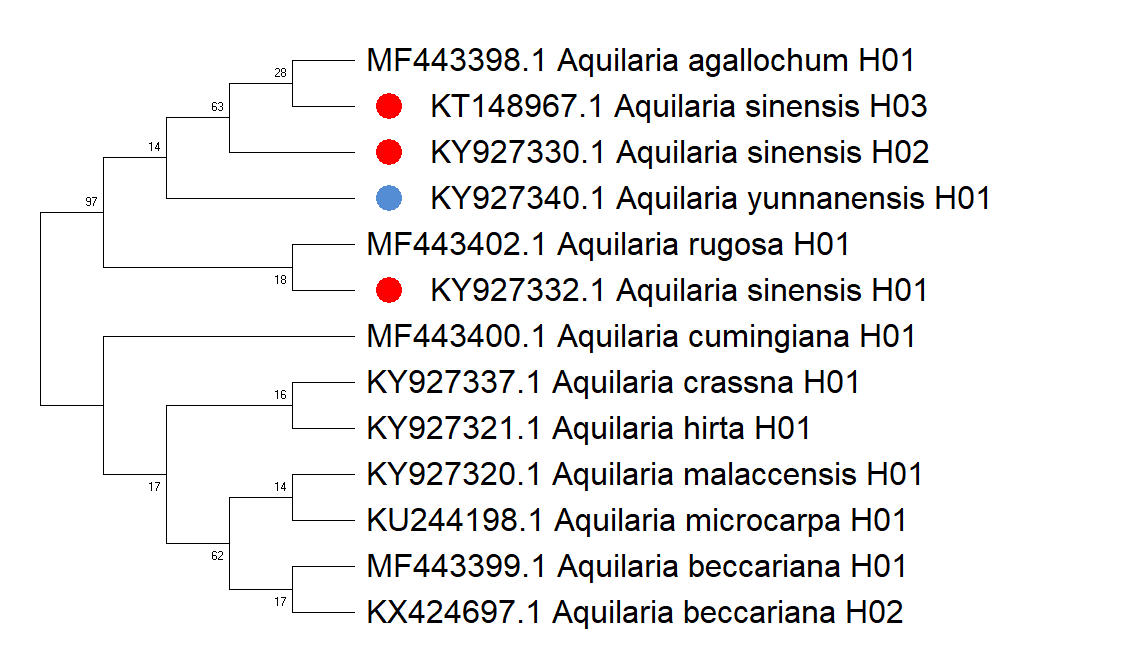


**Figure S3.** Evolutionary tree analysis on different haplotypes of the genus *Aquilaria*.

**
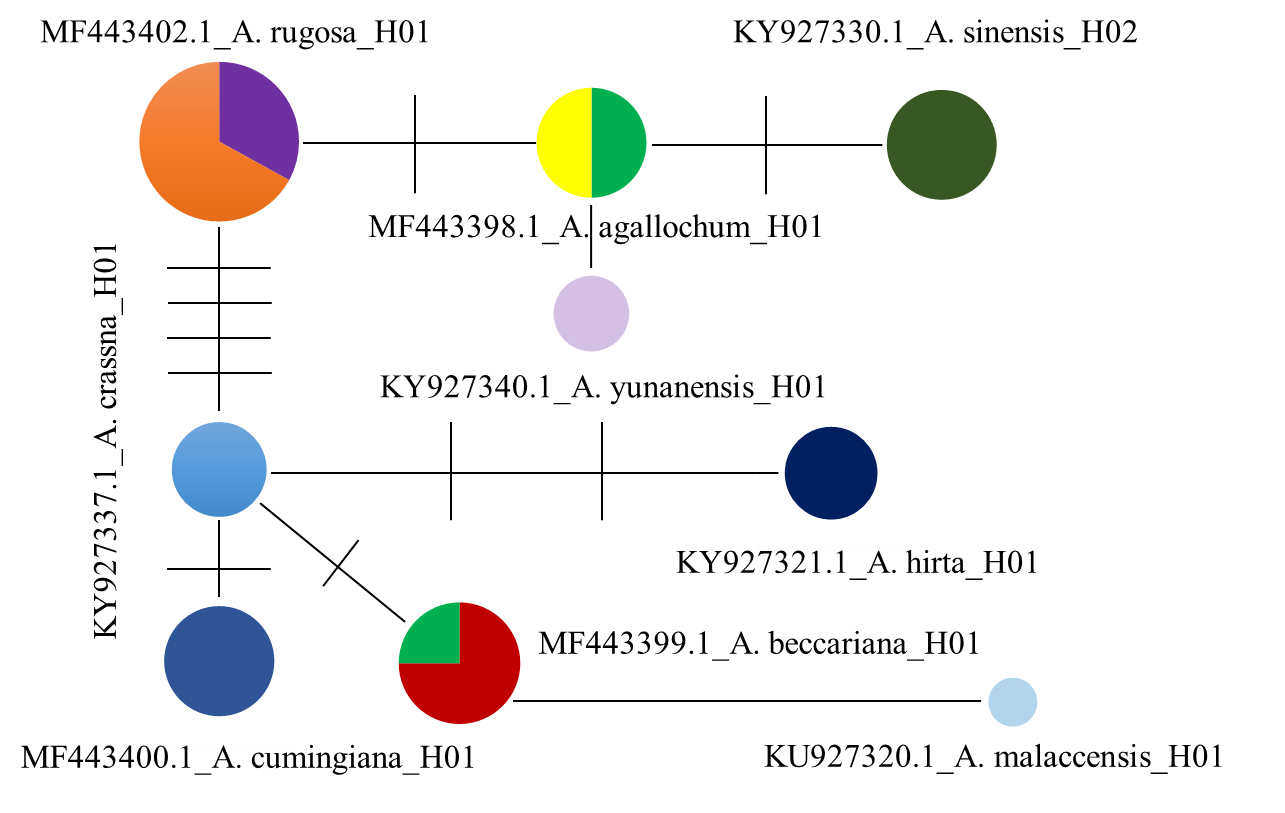
**

**Figure S4.** The Median-Joining network map on different haplotypes of the genus *Aquilaria*.


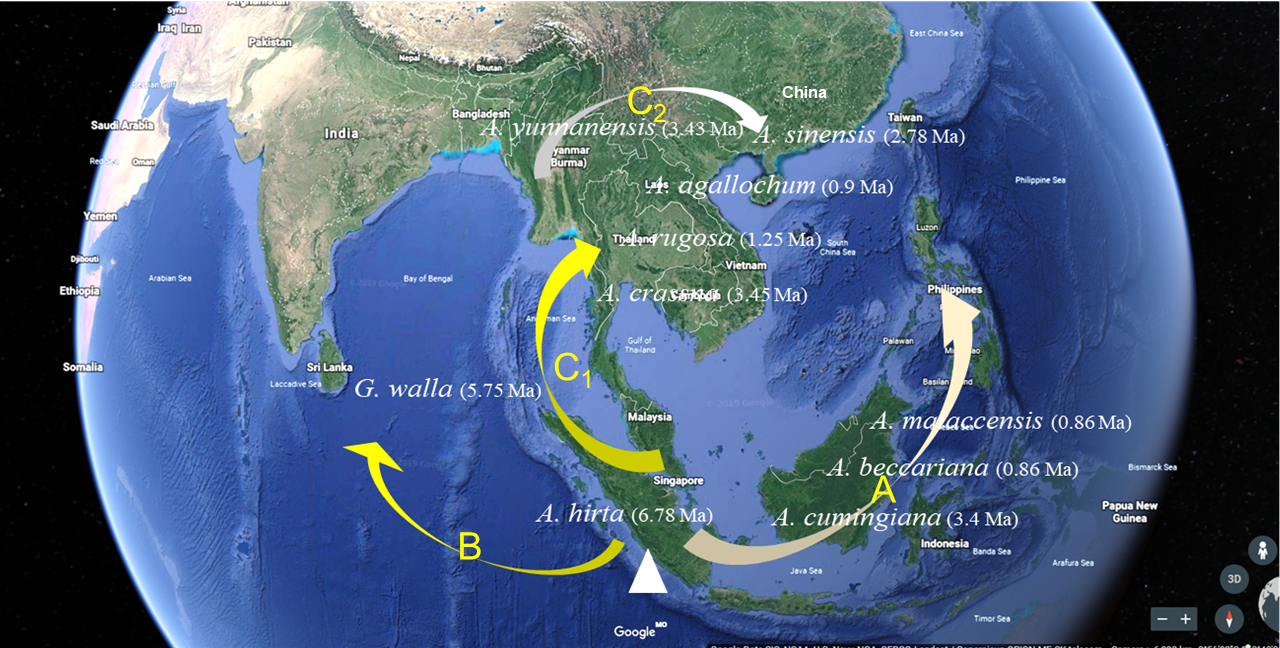


**Figure S5.** Map of species distribution and lineage characteristics of *Aquilaria* under the hypothesis of Malacca origin center before tailoring.


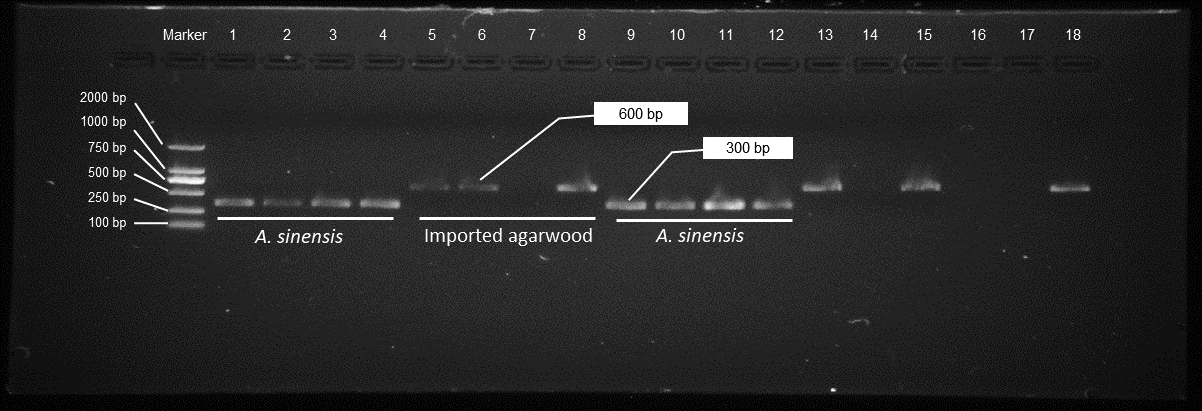


**Figure S6.** The original image of amplified fragments for *Aquilaria* identification with full length membranes.
