# Supplementary material for: Origin and diversification of Aquilaria (Thymelaeaceae): inferences from a phylogenetic study based on matK sequences
Source: Research Square preprint supplement (doi:10.21203/rs.3.rs-4120659/v1), 2024-04-01
Supplement: Supplementary file 2 [file e1a2a9d03ce2d507f4a89ac5.xlsx]

## Sheet: Table S1
Table S1. Genetic distance calculation results based on ITS DNA molecular markers among different Aquilaria species.
Species 1	Species 2	Genetic distance	Std. Err
MH134137.1 Aquilaria agallochum internal transcribed spacer 1 partial sequence 5.8S ribosomal RNA gene complete sequence and internal transcribed spacer 2 partial sequence_{aga}	KU879012.1 Aquilaria agallochum 18S ribosomal RNA gene partial sequence internal transcribed spacer 1 5.8S ribosomal RNA gene and internal transcribed spacer 2 complete sequence and 28S ribosomal RNA gene partial sequence_{aga}	0.00546454	0.00365018
MH134137.1 Aquilaria agallochum internal transcribed spacer 1 partial sequence 5.8S ribosomal RNA gene complete sequence and internal transcribed spacer 2 partial sequence_{aga}	MH134138.1 Aquilaria beccariana internal transcribed spacer 1 partial sequence 5.8S ribosomal RNA gene complete sequence and internal transcribed spacer 2 partial sequence_{aga}	0.00545707	0.00395438
KU879012.1 Aquilaria agallochum 18S ribosomal RNA gene partial sequence internal transcribed spacer 1 5.8S ribosomal RNA gene and internal transcribed spacer 2 complete sequence and 28S ribosomal RNA gene partial sequence_{aga}	MH134138.1 Aquilaria beccariana internal transcribed spacer 1 partial sequence 5.8S ribosomal RNA gene complete sequence and internal transcribed spacer 2 partial sequence_{aga}	0.0109516	0.00537349
MH134137.1 Aquilaria agallochum internal transcribed spacer 1 partial sequence 5.8S ribosomal RNA gene complete sequence and internal transcribed spacer 2 partial sequence_{aga}	KT779116.1 Aquilaria beccariana voucher FBL04001 internal transcribed spacer 1 partial sequence 5.8S ribosomal RNA gene complete sequence and internal transcribed spacer 2 partial sequence_{aga}	0.0249581	0.00802035
KU879012.1 Aquilaria agallochum 18S ribosomal RNA gene partial sequence internal transcribed spacer 1 5.8S ribosomal RNA gene and internal transcribed spacer 2 complete sequence and 28S ribosomal RNA gene partial sequence_{aga}	KT779116.1 Aquilaria beccariana voucher FBL04001 internal transcribed spacer 1 partial sequence 5.8S ribosomal RNA gene complete sequence and internal transcribed spacer 2 partial sequence_{aga}	0.0306725	0.00908761
MH134138.1 Aquilaria beccariana internal transcribed spacer 1 partial sequence 5.8S ribosomal RNA gene complete sequence and internal transcribed spacer 2 partial sequence_{aga}	KT779116.1 Aquilaria beccariana voucher FBL04001 internal transcribed spacer 1 partial sequence 5.8S ribosomal RNA gene complete sequence and internal transcribed spacer 2 partial sequence_{aga}	0.0249581	0.00791269
MH134137.1 Aquilaria agallochum internal transcribed spacer 1 partial sequence 5.8S ribosomal RNA gene complete sequence and internal transcribed spacer 2 partial sequence_{aga}	KT364477.1 Aquilaria beccariana voucher SFN29381 internal transcribed spacer 1 partial sequence 5.8S ribosomal RNA gene complete sequence and internal transcribed spacer 2 partial sequence_{aga}	0.00547011	0.00373822
KU879012.1 Aquilaria agallochum 18S ribosomal RNA gene partial sequence internal transcribed spacer 1 5.8S ribosomal RNA gene and internal transcribed spacer 2 complete sequence and 28S ribosomal RNA gene partial sequence_{aga}	KT364477.1 Aquilaria beccariana voucher SFN29381 internal transcribed spacer 1 partial sequence 5.8S ribosomal RNA gene complete sequence and internal transcribed spacer 2 partial sequence_{aga}	0.010995	0.00508924
MH134138.1 Aquilaria beccariana internal transcribed spacer 1 partial sequence 5.8S ribosomal RNA gene complete sequence and internal transcribed spacer 2 partial sequence_{aga}	KT364477.1 Aquilaria beccariana voucher SFN29381 internal transcribed spacer 1 partial sequence 5.8S ribosomal RNA gene complete sequence and internal transcribed spacer 2 partial sequence_{aga}	0.00547011	0.00391491
KT779116.1 Aquilaria beccariana voucher FBL04001 internal transcribed spacer 1 partial sequence 5.8S ribosomal RNA gene complete sequence and internal transcribed spacer 2 partial sequence_{aga}	KT364477.1 Aquilaria beccariana voucher SFN29381 internal transcribed spacer 1 partial sequence 5.8S ribosomal RNA gene complete sequence and internal transcribed spacer 2 partial sequence_{aga}	0.0250805	0.00792221
MH134137.1 Aquilaria agallochum internal transcribed spacer 1 partial sequence 5.8S ribosomal RNA gene complete sequence and internal transcribed spacer 2 partial sequence_{aga}	KX351419.1 Aquilaria beccariana voucher S1 5.8S ribosomal RNA gene partial sequence internal transcribed spacer 2 complete sequence and large subunit ribosomal RNA gene partial sequence_{aga}	0.0196417	0.00708983
KU879012.1 Aquilaria agallochum 18S ribosomal RNA gene partial sequence internal transcribed spacer 1 5.8S ribosomal RNA gene and internal transcribed spacer 2 complete sequence and 28S ribosomal RNA gene partial sequence_{aga}	KX351419.1 Aquilaria beccariana voucher S1 5.8S ribosomal RNA gene partial sequence internal transcribed spacer 2 complete sequence and large subunit ribosomal RNA gene partial sequence_{aga}	0.0263532	0.00858632
MH134138.1 Aquilaria beccariana internal transcribed spacer 1 partial sequence 5.8S ribosomal RNA gene complete sequence and internal transcribed spacer 2 partial sequence_{aga}	KX351419.1 Aquilaria beccariana voucher S1 5.8S ribosomal RNA gene partial sequence internal transcribed spacer 2 complete sequence and large subunit ribosomal RNA gene partial sequence_{aga}	0.0229505	0.00782382
KT779116.1 Aquilaria beccariana voucher FBL04001 internal transcribed spacer 1 partial sequence 5.8S ribosomal RNA gene complete sequence and internal transcribed spacer 2 partial sequence_{aga}	KX351419.1 Aquilaria beccariana voucher S1 5.8S ribosomal RNA gene partial sequence internal transcribed spacer 2 complete sequence and large subunit ribosomal RNA gene partial sequence_{aga}	0.0469277	0.0114857
KT364477.1 Aquilaria beccariana voucher SFN29381 internal transcribed spacer 1 partial sequence 5.8S ribosomal RNA gene complete sequence and internal transcribed spacer 2 partial sequence_{aga}	KX351419.1 Aquilaria beccariana voucher S1 5.8S ribosomal RNA gene partial sequence internal transcribed spacer 2 complete sequence and large subunit ribosomal RNA gene partial sequence_{aga}	0.0229862	0.00782259
MH134137.1 Aquilaria agallochum internal transcribed spacer 1 partial sequence 5.8S ribosomal RNA gene complete sequence and internal transcribed spacer 2 partial sequence_{aga}	KX424704.1 Aquilaria beccariana 5.8S ribosomal RNA gene partial sequence internal transcribed spacer 2 complete sequence and 28S ribosomal RNA gene partial sequence_{aga}	0.026681	0.00892477
KU879012.1 Aquilaria agallochum 18S ribosomal RNA gene partial sequence internal transcribed spacer 1 5.8S ribosomal RNA gene and internal transcribed spacer 2 complete sequence and 28S ribosomal RNA gene partial sequence_{aga}	KX424704.1 Aquilaria beccariana 5.8S ribosomal RNA gene partial sequence internal transcribed spacer 2 complete sequence and 28S ribosomal RNA gene partial sequence_{aga}	0.0335776	0.0103416
MH134138.1 Aquilaria beccariana internal transcribed spacer 1 partial sequence 5.8S ribosomal RNA gene complete sequence and internal transcribed spacer 2 partial sequence_{aga}	KX424704.1 Aquilaria beccariana 5.8S ribosomal RNA gene partial sequence internal transcribed spacer 2 complete sequence and 28S ribosomal RNA gene partial sequence_{aga}	0.030041	0.00950935
KT779116.1 Aquilaria beccariana voucher FBL04001 internal transcribed spacer 1 partial sequence 5.8S ribosomal RNA gene complete sequence and internal transcribed spacer 2 partial sequence_{aga}	KX424704.1 Aquilaria beccariana 5.8S ribosomal RNA gene partial sequence internal transcribed spacer 2 complete sequence and 28S ribosomal RNA gene partial sequence_{aga}	0	0
KT364477.1 Aquilaria beccariana voucher SFN29381 internal transcribed spacer 1 partial sequence 5.8S ribosomal RNA gene complete sequence and internal transcribed spacer 2 partial sequence_{aga}	KX424704.1 Aquilaria beccariana 5.8S ribosomal RNA gene partial sequence internal transcribed spacer 2 complete sequence and 28S ribosomal RNA gene partial sequence_{aga}	0.0301174	0.00952114
KX351419.1 Aquilaria beccariana voucher S1 5.8S ribosomal RNA gene partial sequence internal transcribed spacer 2 complete sequence and large subunit ribosomal RNA gene partial sequence_{aga}	KX424704.1 Aquilaria beccariana 5.8S ribosomal RNA gene partial sequence internal transcribed spacer 2 complete sequence and 28S ribosomal RNA gene partial sequence_{aga}	0.0440198	0.0111076
MH134137.1 Aquilaria agallochum internal transcribed spacer 1 partial sequence 5.8S ribosomal RNA gene complete sequence and internal transcribed spacer 2 partial sequence_{aga}	KU238038.1 Aquilaria crassna voucher FBL G11 WC3 internal transcribed spacer 2 partial sequence	0.0165072	0.0059524
KU879012.1 Aquilaria agallochum 18S ribosomal RNA gene partial sequence internal transcribed spacer 1 5.8S ribosomal RNA gene and internal transcribed spacer 2 complete sequence and 28S ribosomal RNA gene partial sequence_{aga}	KU238038.1 Aquilaria crassna voucher FBL G11 WC3 internal transcribed spacer 2 partial sequence	0.0221253	0.00719082
MH134138.1 Aquilaria beccariana internal transcribed spacer 1 partial sequence 5.8S ribosomal RNA gene complete sequence and internal transcribed spacer 2 partial sequence_{aga}	KU238038.1 Aquilaria crassna voucher FBL G11 WC3 internal transcribed spacer 2 partial sequence	0.0220708	0.00727399
KT779116.1 Aquilaria beccariana voucher FBL04001 internal transcribed spacer 1 partial sequence 5.8S ribosomal RNA gene complete sequence and internal transcribed spacer 2 partial sequence_{aga}	KU238038.1 Aquilaria crassna voucher FBL G11 WC3 internal transcribed spacer 2 partial sequence	0.0421308	0.0101917
KT364477.1 Aquilaria beccariana voucher SFN29381 internal transcribed spacer 1 partial sequence 5.8S ribosomal RNA gene complete sequence and internal transcribed spacer 2 partial sequence_{aga}	KU238038.1 Aquilaria crassna voucher FBL G11 WC3 internal transcribed spacer 2 partial sequence	0.0221534	0.00722737
KX351419.1 Aquilaria beccariana voucher S1 5.8S ribosomal RNA gene partial sequence internal transcribed spacer 2 complete sequence and large subunit ribosomal RNA gene partial sequence_{aga}	KU238038.1 Aquilaria crassna voucher FBL G11 WC3 internal transcribed spacer 2 partial sequence	0	0
KX424704.1 Aquilaria beccariana 5.8S ribosomal RNA gene partial sequence internal transcribed spacer 2 complete sequence and 28S ribosomal RNA gene partial sequence_{aga}	KU238038.1 Aquilaria crassna voucher FBL G11 WC3 internal transcribed spacer 2 partial sequence	0.0438711	0.011062
MH134137.1 Aquilaria agallochum internal transcribed spacer 1 partial sequence 5.8S ribosomal RNA gene complete sequence and internal transcribed spacer 2 partial sequence_{aga}	MH134139.1 Aquilaria crassna internal transcribed spacer 1 partial sequence 5.8S ribosomal RNA gene complete sequence and internal transcribed spacer 2 partial sequence	0.0165072	0.0059524
KU879012.1 Aquilaria agallochum 18S ribosomal RNA gene partial sequence internal transcribed spacer 1 5.8S ribosomal RNA gene and internal transcribed spacer 2 complete sequence and 28S ribosomal RNA gene partial sequence_{aga}	MH134139.1 Aquilaria crassna internal transcribed spacer 1 partial sequence 5.8S ribosomal RNA gene complete sequence and internal transcribed spacer 2 partial sequence	0.0221253	0.00719082
MH134138.1 Aquilaria beccariana internal transcribed spacer 1 partial sequence 5.8S ribosomal RNA gene complete sequence and internal transcribed spacer 2 partial sequence_{aga}	MH134139.1 Aquilaria crassna internal transcribed spacer 1 partial sequence 5.8S ribosomal RNA gene complete sequence and internal transcribed spacer 2 partial sequence	0.0220708	0.00727399
KT779116.1 Aquilaria beccariana voucher FBL04001 internal transcribed spacer 1 partial sequence 5.8S ribosomal RNA gene complete sequence and internal transcribed spacer 2 partial sequence_{aga}	MH134139.1 Aquilaria crassna internal transcribed spacer 1 partial sequence 5.8S ribosomal RNA gene complete sequence and internal transcribed spacer 2 partial sequence	0.0421308	0.0101917
KT364477.1 Aquilaria beccariana voucher SFN29381 internal transcribed spacer 1 partial sequence 5.8S ribosomal RNA gene complete sequence and internal transcribed spacer 2 partial sequence_{aga}	MH134139.1 Aquilaria crassna internal transcribed spacer 1 partial sequence 5.8S ribosomal RNA gene complete sequence and internal transcribed spacer 2 partial sequence	0.0221534	0.00722737
KX351419.1 Aquilaria beccariana voucher S1 5.8S ribosomal RNA gene partial sequence internal transcribed spacer 2 complete sequence and large subunit ribosomal RNA gene partial sequence_{aga}	MH134139.1 Aquilaria crassna internal transcribed spacer 1 partial sequence 5.8S ribosomal RNA gene complete sequence and internal transcribed spacer 2 partial sequence	0	0
KX424704.1 Aquilaria beccariana 5.8S ribosomal RNA gene partial sequence internal transcribed spacer 2 complete sequence and 28S ribosomal RNA gene partial sequence_{aga}	MH134139.1 Aquilaria crassna internal transcribed spacer 1 partial sequence 5.8S ribosomal RNA gene complete sequence and internal transcribed spacer 2 partial sequence	0.0438711	0.011062
KU238038.1 Aquilaria crassna voucher FBL G11 WC3 internal transcribed spacer 2 partial sequence	MH134139.1 Aquilaria crassna internal transcribed spacer 1 partial sequence 5.8S ribosomal RNA gene complete sequence and internal transcribed spacer 2 partial sequence	0	0
MH134137.1 Aquilaria agallochum internal transcribed spacer 1 partial sequence 5.8S ribosomal RNA gene complete sequence and internal transcribed spacer 2 partial sequence_{aga}	KU244111.1 Aquilaria crassna voucher FBL01017 internal transcribed spacer 2 partial sequence	0.0165072	0.0059524
KU879012.1 Aquilaria agallochum 18S ribosomal RNA gene partial sequence internal transcribed spacer 1 5.8S ribosomal RNA gene and internal transcribed spacer 2 complete sequence and 28S ribosomal RNA gene partial sequence_{aga}	KU244111.1 Aquilaria crassna voucher FBL01017 internal transcribed spacer 2 partial sequence	0.0221253	0.00719082
MH134138.1 Aquilaria beccariana internal transcribed spacer 1 partial sequence 5.8S ribosomal RNA gene complete sequence and internal transcribed spacer 2 partial sequence_{aga}	KU244111.1 Aquilaria crassna voucher FBL01017 internal transcribed spacer 2 partial sequence	0.0220708	0.00727399
KT779116.1 Aquilaria beccariana voucher FBL04001 internal transcribed spacer 1 partial sequence 5.8S ribosomal RNA gene complete sequence and internal transcribed spacer 2 partial sequence_{aga}	KU244111.1 Aquilaria crassna voucher FBL01017 internal transcribed spacer 2 partial sequence	0.0421308	0.0101917
KT364477.1 Aquilaria beccariana voucher SFN29381 internal transcribed spacer 1 partial sequence 5.8S ribosomal RNA gene complete sequence and internal transcribed spacer 2 partial sequence_{aga}	KU244111.1 Aquilaria crassna voucher FBL01017 internal transcribed spacer 2 partial sequence	0.0221534	0.00722737
KX351419.1 Aquilaria beccariana voucher S1 5.8S ribosomal RNA gene partial sequence internal transcribed spacer 2 complete sequence and large subunit ribosomal RNA gene partial sequence_{aga}	KU244111.1 Aquilaria crassna voucher FBL01017 internal transcribed spacer 2 partial sequence	0	0
KX424704.1 Aquilaria beccariana 5.8S ribosomal RNA gene partial sequence internal transcribed spacer 2 complete sequence and 28S ribosomal RNA gene partial sequence_{aga}	KU244111.1 Aquilaria crassna voucher FBL01017 internal transcribed spacer 2 partial sequence	0.0438711	0.011062
KU238038.1 Aquilaria crassna voucher FBL G11 WC3 internal transcribed spacer 2 partial sequence	KU244111.1 Aquilaria crassna voucher FBL01017 internal transcribed spacer 2 partial sequence	0	0
MH134139.1 Aquilaria crassna internal transcribed spacer 1 partial sequence 5.8S ribosomal RNA gene complete sequence and internal transcribed spacer 2 partial sequence	KU244111.1 Aquilaria crassna voucher FBL01017 internal transcribed spacer 2 partial sequence	0	0
MH134137.1 Aquilaria agallochum internal transcribed spacer 1 partial sequence 5.8S ribosomal RNA gene complete sequence and internal transcribed spacer 2 partial sequence_{aga}	KU244110.1 Aquilaria crassna voucher FBL01014 internal transcribed spacer 2 partial sequence	0.0165072	0.0059524
KU879012.1 Aquilaria agallochum 18S ribosomal RNA gene partial sequence internal transcribed spacer 1 5.8S ribosomal RNA gene and internal transcribed spacer 2 complete sequence and 28S ribosomal RNA gene partial sequence_{aga}	KU244110.1 Aquilaria crassna voucher FBL01014 internal transcribed spacer 2 partial sequence	0.0221253	0.00719082
MH134138.1 Aquilaria beccariana internal transcribed spacer 1 partial sequence 5.8S ribosomal RNA gene complete sequence and internal transcribed spacer 2 partial sequence_{aga}	KU244110.1 Aquilaria crassna voucher FBL01014 internal transcribed spacer 2 partial sequence	0.0220708	0.00727399
KT779116.1 Aquilaria beccariana voucher FBL04001 internal transcribed spacer 1 partial sequence 5.8S ribosomal RNA gene complete sequence and internal transcribed spacer 2 partial sequence_{aga}	KU244110.1 Aquilaria crassna voucher FBL01014 internal transcribed spacer 2 partial sequence	0.0421308	0.0101917
KT364477.1 Aquilaria beccariana voucher SFN29381 internal transcribed spacer 1 partial sequence 5.8S ribosomal RNA gene complete sequence and internal transcribed spacer 2 partial sequence_{aga}	KU244110.1 Aquilaria crassna voucher FBL01014 internal transcribed spacer 2 partial sequence	0.0221534	0.00722737
KX351419.1 Aquilaria beccariana voucher S1 5.8S ribosomal RNA gene partial sequence internal transcribed spacer 2 complete sequence and large subunit ribosomal RNA gene partial sequence_{aga}	KU244110.1 Aquilaria crassna voucher FBL01014 internal transcribed spacer 2 partial sequence	0	0
KX424704.1 Aquilaria beccariana 5.8S ribosomal RNA gene partial sequence internal transcribed spacer 2 complete sequence and 28S ribosomal RNA gene partial sequence_{aga}	KU244110.1 Aquilaria crassna voucher FBL01014 internal transcribed spacer 2 partial sequence	0.0438711	0.011062
KU238038.1 Aquilaria crassna voucher FBL G11 WC3 internal transcribed spacer 2 partial sequence	KU244110.1 Aquilaria crassna voucher FBL01014 internal transcribed spacer 2 partial sequence	0	0
MH134139.1 Aquilaria crassna internal transcribed spacer 1 partial sequence 5.8S ribosomal RNA gene complete sequence and internal transcribed spacer 2 partial sequence	KU244110.1 Aquilaria crassna voucher FBL01014 internal transcribed spacer 2 partial sequence	0	0
KU244111.1 Aquilaria crassna voucher FBL01017 internal transcribed spacer 2 partial sequence	KU244110.1 Aquilaria crassna voucher FBL01014 internal transcribed spacer 2 partial sequence	0	0
MH134137.1 Aquilaria agallochum internal transcribed spacer 1 partial sequence 5.8S ribosomal RNA gene complete sequence and internal transcribed spacer 2 partial sequence_{aga}	KU244109.1 Aquilaria crassna voucher FBL01013 internal transcribed spacer 2 partial sequence	0.0165072	0.0059524
KU879012.1 Aquilaria agallochum 18S ribosomal RNA gene partial sequence internal transcribed spacer 1 5.8S ribosomal RNA gene and internal transcribed spacer 2 complete sequence and 28S ribosomal RNA gene partial sequence_{aga}	KU244109.1 Aquilaria crassna voucher FBL01013 internal transcribed spacer 2 partial sequence	0.0221253	0.00719082
MH134138.1 Aquilaria beccariana internal transcribed spacer 1 partial sequence 5.8S ribosomal RNA gene complete sequence and internal transcribed spacer 2 partial sequence_{aga}	KU244109.1 Aquilaria crassna voucher FBL01013 internal transcribed spacer 2 partial sequence	0.0220708	0.00727399
KT779116.1 Aquilaria beccariana voucher FBL04001 internal transcribed spacer 1 partial sequence 5.8S ribosomal RNA gene complete sequence and internal transcribed spacer 2 partial sequence_{aga}	KU244109.1 Aquilaria crassna voucher FBL01013 internal transcribed spacer 2 partial sequence	0.0421308	0.0101917
KT364477.1 Aquilaria beccariana voucher SFN29381 internal transcribed spacer 1 partial sequence 5.8S ribosomal RNA gene complete sequence and internal transcribed spacer 2 partial sequence_{aga}	KU244109.1 Aquilaria crassna voucher FBL01013 internal transcribed spacer 2 partial sequence	0.0221534	0.00722737
KX351419.1 Aquilaria beccariana voucher S1 5.8S ribosomal RNA gene partial sequence internal transcribed spacer 2 complete sequence and large subunit ribosomal RNA gene partial sequence_{aga}	KU244109.1 Aquilaria crassna voucher FBL01013 internal transcribed spacer 2 partial sequence	0	0
KX424704.1 Aquilaria beccariana 5.8S ribosomal RNA gene partial sequence internal transcribed spacer 2 complete sequence and 28S ribosomal RNA gene partial sequence_{aga}	KU244109.1 Aquilaria crassna voucher FBL01013 internal transcribed spacer 2 partial sequence	0.0438711	0.011062
KU238038.1 Aquilaria crassna voucher FBL G11 WC3 internal transcribed spacer 2 partial sequence	KU244109.1 Aquilaria crassna voucher FBL01013 internal transcribed spacer 2 partial sequence	0	0
MH134139.1 Aquilaria crassna internal transcribed spacer 1 partial sequence 5.8S ribosomal RNA gene complete sequence and internal transcribed spacer 2 partial sequence	KU244109.1 Aquilaria crassna voucher FBL01013 internal transcribed spacer 2 partial sequence	0	0
KU244111.1 Aquilaria crassna voucher FBL01017 internal transcribed spacer 2 partial sequence	KU244109.1 Aquilaria crassna voucher FBL01013 internal transcribed spacer 2 partial sequence	0	0
KU244110.1 Aquilaria crassna voucher FBL01014 internal transcribed spacer 2 partial sequence	KU244109.1 Aquilaria crassna voucher FBL01013 internal transcribed spacer 2 partial sequence	0	0
MH134137.1 Aquilaria agallochum internal transcribed spacer 1 partial sequence 5.8S ribosomal RNA gene complete sequence and internal transcribed spacer 2 partial sequence_{aga}	KU244108.1 Aquilaria crassna voucher FBL01012 internal transcribed spacer 2 partial sequence	0.0165072	0.0059524
KU879012.1 Aquilaria agallochum 18S ribosomal RNA gene partial sequence internal transcribed spacer 1 5.8S ribosomal RNA gene and internal transcribed spacer 2 complete sequence and 28S ribosomal RNA gene partial sequence_{aga}	KU244108.1 Aquilaria crassna voucher FBL01012 internal transcribed spacer 2 partial sequence	0.0221253	0.00719082
MH134138.1 Aquilaria beccariana internal transcribed spacer 1 partial sequence 5.8S ribosomal RNA gene complete sequence and internal transcribed spacer 2 partial sequence_{aga}	KU244108.1 Aquilaria crassna voucher FBL01012 internal transcribed spacer 2 partial sequence	0.0220708	0.00727399
KT779116.1 Aquilaria beccariana voucher FBL04001 internal transcribed spacer 1 partial sequence 5.8S ribosomal RNA gene complete sequence and internal transcribed spacer 2 partial sequence_{aga}	KU244108.1 Aquilaria crassna voucher FBL01012 internal transcribed spacer 2 partial sequence	0.0421308	0.0101917
KT364477.1 Aquilaria beccariana voucher SFN29381 internal transcribed spacer 1 partial sequence 5.8S ribosomal RNA gene complete sequence and internal transcribed spacer 2 partial sequence_{aga}	KU244108.1 Aquilaria crassna voucher FBL01012 internal transcribed spacer 2 partial sequence	0.0221534	0.00722737
KX351419.1 Aquilaria beccariana voucher S1 5.8S ribosomal RNA gene partial sequence internal transcribed spacer 2 complete sequence and large subunit ribosomal RNA gene partial sequence_{aga}	KU244108.1 Aquilaria crassna voucher FBL01012 internal transcribed spacer 2 partial sequence	0	0
KX424704.1 Aquilaria beccariana 5.8S ribosomal RNA gene partial sequence internal transcribed spacer 2 complete sequence and 28S ribosomal RNA gene partial sequence_{aga}	KU244108.1 Aquilaria crassna voucher FBL01012 internal transcribed spacer 2 partial sequence	0.0438711	0.011062
KU238038.1 Aquilaria crassna voucher FBL G11 WC3 internal transcribed spacer 2 partial sequence	KU244108.1 Aquilaria crassna voucher FBL01012 internal transcribed spacer 2 partial sequence	0	0
MH134139.1 Aquilaria crassna internal transcribed spacer 1 partial sequence 5.8S ribosomal RNA gene complete sequence and internal transcribed spacer 2 partial sequence	KU244108.1 Aquilaria crassna voucher FBL01012 internal transcribed spacer 2 partial sequence	0	0
KU244111.1 Aquilaria crassna voucher FBL01017 internal transcribed spacer 2 partial sequence	KU244108.1 Aquilaria crassna voucher FBL01012 internal transcribed spacer 2 partial sequence	0	0
KU244110.1 Aquilaria crassna voucher FBL01014 internal transcribed spacer 2 partial sequence	KU244108.1 Aquilaria crassna voucher FBL01012 internal transcribed spacer 2 partial sequence	0	0
KU244109.1 Aquilaria crassna voucher FBL01013 internal transcribed spacer 2 partial sequence	KU244108.1 Aquilaria crassna voucher FBL01012 internal transcribed spacer 2 partial sequence	0	0
MH134137.1 Aquilaria agallochum internal transcribed spacer 1 partial sequence 5.8S ribosomal RNA gene complete sequence and internal transcribed spacer 2 partial sequence_{aga}	KU238037.1 Aquilaria crassna voucher FBL G10 WC2 internal transcribed spacer 2 partial sequence	0.0137217	0.00541312
KU879012.1 Aquilaria agallochum 18S ribosomal RNA gene partial sequence internal transcribed spacer 1 5.8S ribosomal RNA gene and internal transcribed spacer 2 complete sequence and 28S ribosomal RNA gene partial sequence_{aga}	KU238037.1 Aquilaria crassna voucher FBL G10 WC2 internal transcribed spacer 2 partial sequence	0.0193084	0.00667717
MH134138.1 Aquilaria beccariana internal transcribed spacer 1 partial sequence 5.8S ribosomal RNA gene complete sequence and internal transcribed spacer 2 partial sequence_{aga}	KU238037.1 Aquilaria crassna voucher FBL G10 WC2 internal transcribed spacer 2 partial sequence	0.0192697	0.00684829
KT779116.1 Aquilaria beccariana voucher FBL04001 internal transcribed spacer 1 partial sequence 5.8S ribosomal RNA gene complete sequence and internal transcribed spacer 2 partial sequence_{aga}	KU238037.1 Aquilaria crassna voucher FBL G10 WC2 internal transcribed spacer 2 partial sequence	0.0392154	0.00971233
KT364477.1 Aquilaria beccariana voucher SFN29381 internal transcribed spacer 1 partial sequence 5.8S ribosomal RNA gene complete sequence and internal transcribed spacer 2 partial sequence_{aga}	KU238037.1 Aquilaria crassna voucher FBL G10 WC2 internal transcribed spacer 2 partial sequence	0.0193365	0.00673821
KX351419.1 Aquilaria beccariana voucher S1 5.8S ribosomal RNA gene partial sequence internal transcribed spacer 2 complete sequence and large subunit ribosomal RNA gene partial sequence_{aga}	KU238037.1 Aquilaria crassna voucher FBL G10 WC2 internal transcribed spacer 2 partial sequence	0.00323626	0.00324725
KX424704.1 Aquilaria beccariana 5.8S ribosomal RNA gene partial sequence internal transcribed spacer 2 complete sequence and 28S ribosomal RNA gene partial sequence_{aga}	KU238037.1 Aquilaria crassna voucher FBL G10 WC2 internal transcribed spacer 2 partial sequence	0.0403623	0.0104697
KU238038.1 Aquilaria crassna voucher FBL G11 WC3 internal transcribed spacer 2 partial sequence	KU238037.1 Aquilaria crassna voucher FBL G10 WC2 internal transcribed spacer 2 partial sequence	0.0027248	0.00273681
MH134139.1 Aquilaria crassna internal transcribed spacer 1 partial sequence 5.8S ribosomal RNA gene complete sequence and internal transcribed spacer 2 partial sequence	KU238037.1 Aquilaria crassna voucher FBL G10 WC2 internal transcribed spacer 2 partial sequence	0.0027248	0.00273681
KU244111.1 Aquilaria crassna voucher FBL01017 internal transcribed spacer 2 partial sequence	KU238037.1 Aquilaria crassna voucher FBL G10 WC2 internal transcribed spacer 2 partial sequence	0.0027248	0.00273681
KU244110.1 Aquilaria crassna voucher FBL01014 internal transcribed spacer 2 partial sequence	KU238037.1 Aquilaria crassna voucher FBL G10 WC2 internal transcribed spacer 2 partial sequence	0.0027248	0.00273681
KU244109.1 Aquilaria crassna voucher FBL01013 internal transcribed spacer 2 partial sequence	KU238037.1 Aquilaria crassna voucher FBL G10 WC2 internal transcribed spacer 2 partial sequence	0.0027248	0.00273681
KU244108.1 Aquilaria crassna voucher FBL01012 internal transcribed spacer 2 partial sequence	KU238037.1 Aquilaria crassna voucher FBL G10 WC2 internal transcribed spacer 2 partial sequence	0.0027248	0.00273681
MH134137.1 Aquilaria agallochum internal transcribed spacer 1 partial sequence 5.8S ribosomal RNA gene complete sequence and internal transcribed spacer 2 partial sequence_{aga}	KU238035.1 Aquilaria crassna voucher FBL G04 WC1 internal transcribed spacer 2 partial sequence	0.0137217	0.00541312
KU879012.1 Aquilaria agallochum 18S ribosomal RNA gene partial sequence internal transcribed spacer 1 5.8S ribosomal RNA gene and internal transcribed spacer 2 complete sequence and 28S ribosomal RNA gene partial sequence_{aga}	KU238035.1 Aquilaria crassna voucher FBL G04 WC1 internal transcribed spacer 2 partial sequence	0.0193084	0.00667717
MH134138.1 Aquilaria beccariana internal transcribed spacer 1 partial sequence 5.8S ribosomal RNA gene complete sequence and internal transcribed spacer 2 partial sequence_{aga}	KU238035.1 Aquilaria crassna voucher FBL G04 WC1 internal transcribed spacer 2 partial sequence	0.0192697	0.00684829
KT779116.1 Aquilaria beccariana voucher FBL04001 internal transcribed spacer 1 partial sequence 5.8S ribosomal RNA gene complete sequence and internal transcribed spacer 2 partial sequence_{aga}	KU238035.1 Aquilaria crassna voucher FBL G04 WC1 internal transcribed spacer 2 partial sequence	0.0392154	0.00971233
KT364477.1 Aquilaria beccariana voucher SFN29381 internal transcribed spacer 1 partial sequence 5.8S ribosomal RNA gene complete sequence and internal transcribed spacer 2 partial sequence_{aga}	KU238035.1 Aquilaria crassna voucher FBL G04 WC1 internal transcribed spacer 2 partial sequence	0.0193365	0.00673821
KX351419.1 Aquilaria beccariana voucher S1 5.8S ribosomal RNA gene partial sequence internal transcribed spacer 2 complete sequence and large subunit ribosomal RNA gene partial sequence_{aga}	KU238035.1 Aquilaria crassna voucher FBL G04 WC1 internal transcribed spacer 2 partial sequence	0.00323626	0.00324725
KX424704.1 Aquilaria beccariana 5.8S ribosomal RNA gene partial sequence internal transcribed spacer 2 complete sequence and 28S ribosomal RNA gene partial sequence_{aga}	KU238035.1 Aquilaria crassna voucher FBL G04 WC1 internal transcribed spacer 2 partial sequence	0.0403623	0.0104697
KU238038.1 Aquilaria crassna voucher FBL G11 WC3 internal transcribed spacer 2 partial sequence	KU238035.1 Aquilaria crassna voucher FBL G04 WC1 internal transcribed spacer 2 partial sequence	0.0027248	0.00273681
MH134139.1 Aquilaria crassna internal transcribed spacer 1 partial sequence 5.8S ribosomal RNA gene complete sequence and internal transcribed spacer 2 partial sequence	KU238035.1 Aquilaria crassna voucher FBL G04 WC1 internal transcribed spacer 2 partial sequence	0.0027248	0.00273681
KU244111.1 Aquilaria crassna voucher FBL01017 internal transcribed spacer 2 partial sequence	KU238035.1 Aquilaria crassna voucher FBL G04 WC1 internal transcribed spacer 2 partial sequence	0.0027248	0.00273681
KU244110.1 Aquilaria crassna voucher FBL01014 internal transcribed spacer 2 partial sequence	KU238035.1 Aquilaria crassna voucher FBL G04 WC1 internal transcribed spacer 2 partial sequence	0.0027248	0.00273681
KU244109.1 Aquilaria crassna voucher FBL01013 internal transcribed spacer 2 partial sequence	KU238035.1 Aquilaria crassna voucher FBL G04 WC1 internal transcribed spacer 2 partial sequence	0.0027248	0.00273681
KU244108.1 Aquilaria crassna voucher FBL01012 internal transcribed spacer 2 partial sequence	KU238035.1 Aquilaria crassna voucher FBL G04 WC1 internal transcribed spacer 2 partial sequence	0.0027248	0.00273681
KU238037.1 Aquilaria crassna voucher FBL G10 WC2 internal transcribed spacer 2 partial sequence	KU238035.1 Aquilaria crassna voucher FBL G04 WC1 internal transcribed spacer 2 partial sequence	0	0
MH134137.1 Aquilaria agallochum internal transcribed spacer 1 partial sequence 5.8S ribosomal RNA gene complete sequence and internal transcribed spacer 2 partial sequence_{aga}	KU244085.1 Aquilaria crassna voucher FBL01017 internal transcribed spacer 1 partial sequence 5.8S ribosomal RNA gene complete sequence and internal transcribed spacer 2 partial sequence	0.0165072	0.0059524
KU879012.1 Aquilaria agallochum 18S ribosomal RNA gene partial sequence internal transcribed spacer 1 5.8S ribosomal RNA gene and internal transcribed spacer 2 complete sequence and 28S ribosomal RNA gene partial sequence_{aga}	KU244085.1 Aquilaria crassna voucher FBL01017 internal transcribed spacer 1 partial sequence 5.8S ribosomal RNA gene complete sequence and internal transcribed spacer 2 partial sequence	0.0221253	0.00719082
MH134138.1 Aquilaria beccariana internal transcribed spacer 1 partial sequence 5.8S ribosomal RNA gene complete sequence and internal transcribed spacer 2 partial sequence_{aga}	KU244085.1 Aquilaria crassna voucher FBL01017 internal transcribed spacer 1 partial sequence 5.8S ribosomal RNA gene complete sequence and internal transcribed spacer 2 partial sequence	0.0220708	0.00727399
KT779116.1 Aquilaria beccariana voucher FBL04001 internal transcribed spacer 1 partial sequence 5.8S ribosomal RNA gene complete sequence and internal transcribed spacer 2 partial sequence_{aga}	KU244085.1 Aquilaria crassna voucher FBL01017 internal transcribed spacer 1 partial sequence 5.8S ribosomal RNA gene complete sequence and internal transcribed spacer 2 partial sequence	0.0421308	0.0101917
KT364477.1 Aquilaria beccariana voucher SFN29381 internal transcribed spacer 1 partial sequence 5.8S ribosomal RNA gene complete sequence and internal transcribed spacer 2 partial sequence_{aga}	KU244085.1 Aquilaria crassna voucher FBL01017 internal transcribed spacer 1 partial sequence 5.8S ribosomal RNA gene complete sequence and internal transcribed spacer 2 partial sequence	0.0221534	0.00722737
KX351419.1 Aquilaria beccariana voucher S1 5.8S ribosomal RNA gene partial sequence internal transcribed spacer 2 complete sequence and large subunit ribosomal RNA gene partial sequence_{aga}	KU244085.1 Aquilaria crassna voucher FBL01017 internal transcribed spacer 1 partial sequence 5.8S ribosomal RNA gene complete sequence and internal transcribed spacer 2 partial sequence	0	0
KX424704.1 Aquilaria beccariana 5.8S ribosomal RNA gene partial sequence internal transcribed spacer 2 complete sequence and 28S ribosomal RNA gene partial sequence_{aga}	KU244085.1 Aquilaria crassna voucher FBL01017 internal transcribed spacer 1 partial sequence 5.8S ribosomal RNA gene complete sequence and internal transcribed spacer 2 partial sequence	0.0438711	0.011062
KU238038.1 Aquilaria crassna voucher FBL G11 WC3 internal transcribed spacer 2 partial sequence	KU244085.1 Aquilaria crassna voucher FBL01017 internal transcribed spacer 1 partial sequence 5.8S ribosomal RNA gene complete sequence and internal transcribed spacer 2 partial sequence	0	0
MH134139.1 Aquilaria crassna internal transcribed spacer 1 partial sequence 5.8S ribosomal RNA gene complete sequence and internal transcribed spacer 2 partial sequence	KU244085.1 Aquilaria crassna voucher FBL01017 internal transcribed spacer 1 partial sequence 5.8S ribosomal RNA gene complete sequence and internal transcribed spacer 2 partial sequence	0	0
KU244111.1 Aquilaria crassna voucher FBL01017 internal transcribed spacer 2 partial sequence	KU244085.1 Aquilaria crassna voucher FBL01017 internal transcribed spacer 1 partial sequence 5.8S ribosomal RNA gene complete sequence and internal transcribed spacer 2 partial sequence	0	0
KU244110.1 Aquilaria crassna voucher FBL01014 internal transcribed spacer 2 partial sequence	KU244085.1 Aquilaria crassna voucher FBL01017 internal transcribed spacer 1 partial sequence 5.8S ribosomal RNA gene complete sequence and internal transcribed spacer 2 partial sequence	0	0
KU244109.1 Aquilaria crassna voucher FBL01013 internal transcribed spacer 2 partial sequence	KU244085.1 Aquilaria crassna voucher FBL01017 internal transcribed spacer 1 partial sequence 5.8S ribosomal RNA gene complete sequence and internal transcribed spacer 2 partial sequence	0	0
KU244108.1 Aquilaria crassna voucher FBL01012 internal transcribed spacer 2 partial sequence	KU244085.1 Aquilaria crassna voucher FBL01017 internal transcribed spacer 1 partial sequence 5.8S ribosomal RNA gene complete sequence and internal transcribed spacer 2 partial sequence	0	0
KU238037.1 Aquilaria crassna voucher FBL G10 WC2 internal transcribed spacer 2 partial sequence	KU244085.1 Aquilaria crassna voucher FBL01017 internal transcribed spacer 1 partial sequence 5.8S ribosomal RNA gene complete sequence and internal transcribed spacer 2 partial sequence	0.0027248	0.00273681
KU238035.1 Aquilaria crassna voucher FBL G04 WC1 internal transcribed spacer 2 partial sequence	KU244085.1 Aquilaria crassna voucher FBL01017 internal transcribed spacer 1 partial sequence 5.8S ribosomal RNA gene complete sequence and internal transcribed spacer 2 partial sequence	0.0027248	0.00273681
MH134137.1 Aquilaria agallochum internal transcribed spacer 1 partial sequence 5.8S ribosomal RNA gene complete sequence and internal transcribed spacer 2 partial sequence_{aga}	KU244084.1 Aquilaria crassna voucher FBL01014 internal transcribed spacer 1 partial sequence 5.8S ribosomal RNA gene complete sequence and internal transcribed spacer 2 partial sequence	0.0165072	0.0059524
KU879012.1 Aquilaria agallochum 18S ribosomal RNA gene partial sequence internal transcribed spacer 1 5.8S ribosomal RNA gene and internal transcribed spacer 2 complete sequence and 28S ribosomal RNA gene partial sequence_{aga}	KU244084.1 Aquilaria crassna voucher FBL01014 internal transcribed spacer 1 partial sequence 5.8S ribosomal RNA gene complete sequence and internal transcribed spacer 2 partial sequence	0.0221253	0.00719082
MH134138.1 Aquilaria beccariana internal transcribed spacer 1 partial sequence 5.8S ribosomal RNA gene complete sequence and internal transcribed spacer 2 partial sequence_{aga}	KU244084.1 Aquilaria crassna voucher FBL01014 internal transcribed spacer 1 partial sequence 5.8S ribosomal RNA gene complete sequence and internal transcribed spacer 2 partial sequence	0.0220708	0.00727399
KT779116.1 Aquilaria beccariana voucher FBL04001 internal transcribed spacer 1 partial sequence 5.8S ribosomal RNA gene complete sequence and internal transcribed spacer 2 partial sequence_{aga}	KU244084.1 Aquilaria crassna voucher FBL01014 internal transcribed spacer 1 partial sequence 5.8S ribosomal RNA gene complete sequence and internal transcribed spacer 2 partial sequence	0.0421308	0.0101917
KT364477.1 Aquilaria beccariana voucher SFN29381 internal transcribed spacer 1 partial sequence 5.8S ribosomal RNA gene complete sequence and internal transcribed spacer 2 partial sequence_{aga}	KU244084.1 Aquilaria crassna voucher FBL01014 internal transcribed spacer 1 partial sequence 5.8S ribosomal RNA gene complete sequence and internal transcribed spacer 2 partial sequence	0.0221534	0.00722737
KX351419.1 Aquilaria beccariana voucher S1 5.8S ribosomal RNA gene partial sequence internal transcribed spacer 2 complete sequence and large subunit ribosomal RNA gene partial sequence_{aga}	KU244084.1 Aquilaria crassna voucher FBL01014 internal transcribed spacer 1 partial sequence 5.8S ribosomal RNA gene complete sequence and internal transcribed spacer 2 partial sequence	0	0
KX424704.1 Aquilaria beccariana 5.8S ribosomal RNA gene partial sequence internal transcribed spacer 2 complete sequence and 28S ribosomal RNA gene partial sequence_{aga}	KU244084.1 Aquilaria crassna voucher FBL01014 internal transcribed spacer 1 partial sequence 5.8S ribosomal RNA gene complete sequence and internal transcribed spacer 2 partial sequence	0.0438711	0.011062
KU238038.1 Aquilaria crassna voucher FBL G11 WC3 internal transcribed spacer 2 partial sequence	KU244084.1 Aquilaria crassna voucher FBL01014 internal transcribed spacer 1 partial sequence 5.8S ribosomal RNA gene complete sequence and internal transcribed spacer 2 partial sequence	0	0
MH134139.1 Aquilaria crassna internal transcribed spacer 1 partial sequence 5.8S ribosomal RNA gene complete sequence and internal transcribed spacer 2 partial sequence	KU244084.1 Aquilaria crassna voucher FBL01014 internal transcribed spacer 1 partial sequence 5.8S ribosomal RNA gene complete sequence and internal transcribed spacer 2 partial sequence	0	0
KU244111.1 Aquilaria crassna voucher FBL01017 internal transcribed spacer 2 partial sequence	KU244084.1 Aquilaria crassna voucher FBL01014 internal transcribed spacer 1 partial sequence 5.8S ribosomal RNA gene complete sequence and internal transcribed spacer 2 partial sequence	0	0
KU244110.1 Aquilaria crassna voucher FBL01014 internal transcribed spacer 2 partial sequence	KU244084.1 Aquilaria crassna voucher FBL01014 internal transcribed spacer 1 partial sequence 5.8S ribosomal RNA gene complete sequence and internal transcribed spacer 2 partial sequence	0	0
KU244109.1 Aquilaria crassna voucher FBL01013 internal transcribed spacer 2 partial sequence	KU244084.1 Aquilaria crassna voucher FBL01014 internal transcribed spacer 1 partial sequence 5.8S ribosomal RNA gene complete sequence and internal transcribed spacer 2 partial sequence	0	0
KU244108.1 Aquilaria crassna voucher FBL01012 internal transcribed spacer 2 partial sequence	KU244084.1 Aquilaria crassna voucher FBL01014 internal transcribed spacer 1 partial sequence 5.8S ribosomal RNA gene complete sequence and internal transcribed spacer 2 partial sequence	0	0
KU238037.1 Aquilaria crassna voucher FBL G10 WC2 internal transcribed spacer 2 partial sequence	KU244084.1 Aquilaria crassna voucher FBL01014 internal transcribed spacer 1 partial sequence 5.8S ribosomal RNA gene complete sequence and internal transcribed spacer 2 partial sequence	0.0027248	0.00273681
KU238035.1 Aquilaria crassna voucher FBL G04 WC1 internal transcribed spacer 2 partial sequence	KU244084.1 Aquilaria crassna voucher FBL01014 internal transcribed spacer 1 partial sequence 5.8S ribosomal RNA gene complete sequence and internal transcribed spacer 2 partial sequence	0.0027248	0.00273681
KU244085.1 Aquilaria crassna voucher FBL01017 internal transcribed spacer 1 partial sequence 5.8S ribosomal RNA gene complete sequence and internal transcribed spacer 2 partial sequence	KU244084.1 Aquilaria crassna voucher FBL01014 internal transcribed spacer 1 partial sequence 5.8S ribosomal RNA gene complete sequence and internal transcribed spacer 2 partial sequence	0	0
MH134137.1 Aquilaria agallochum internal transcribed spacer 1 partial sequence 5.8S ribosomal RNA gene complete sequence and internal transcribed spacer 2 partial sequence_{aga}	KU244083.1 Aquilaria crassna voucher FBL01013 internal transcribed spacer 1 partial sequence 5.8S ribosomal RNA gene complete sequence and internal transcribed spacer 2 partial sequence_{cra}	0.0165072	0.0059524
KU879012.1 Aquilaria agallochum 18S ribosomal RNA gene partial sequence internal transcribed spacer 1 5.8S ribosomal RNA gene and internal transcribed spacer 2 complete sequence and 28S ribosomal RNA gene partial sequence_{aga}	KU244083.1 Aquilaria crassna voucher FBL01013 internal transcribed spacer 1 partial sequence 5.8S ribosomal RNA gene complete sequence and internal transcribed spacer 2 partial sequence_{cra}	0.0221253	0.00719082
MH134138.1 Aquilaria beccariana internal transcribed spacer 1 partial sequence 5.8S ribosomal RNA gene complete sequence and internal transcribed spacer 2 partial sequence_{aga}	KU244083.1 Aquilaria crassna voucher FBL01013 internal transcribed spacer 1 partial sequence 5.8S ribosomal RNA gene complete sequence and internal transcribed spacer 2 partial sequence_{cra}	0.0220708	0.00727399
KT779116.1 Aquilaria beccariana voucher FBL04001 internal transcribed spacer 1 partial sequence 5.8S ribosomal RNA gene complete sequence and internal transcribed spacer 2 partial sequence_{aga}	KU244083.1 Aquilaria crassna voucher FBL01013 internal transcribed spacer 1 partial sequence 5.8S ribosomal RNA gene complete sequence and internal transcribed spacer 2 partial sequence_{cra}	0.0421308	0.0101917
KT364477.1 Aquilaria beccariana voucher SFN29381 internal transcribed spacer 1 partial sequence 5.8S ribosomal RNA gene complete sequence and internal transcribed spacer 2 partial sequence_{aga}	KU244083.1 Aquilaria crassna voucher FBL01013 internal transcribed spacer 1 partial sequence 5.8S ribosomal RNA gene complete sequence and internal transcribed spacer 2 partial sequence_{cra}	0.0221534	0.00722737
KX351419.1 Aquilaria beccariana voucher S1 5.8S ribosomal RNA gene partial sequence internal transcribed spacer 2 complete sequence and large subunit ribosomal RNA gene partial sequence_{aga}	KU244083.1 Aquilaria crassna voucher FBL01013 internal transcribed spacer 1 partial sequence 5.8S ribosomal RNA gene complete sequence and internal transcribed spacer 2 partial sequence_{cra}	0	0
KX424704.1 Aquilaria beccariana 5.8S ribosomal RNA gene partial sequence internal transcribed spacer 2 complete sequence and 28S ribosomal RNA gene partial sequence_{aga}	KU244083.1 Aquilaria crassna voucher FBL01013 internal transcribed spacer 1 partial sequence 5.8S ribosomal RNA gene complete sequence and internal transcribed spacer 2 partial sequence_{cra}	0.0438711	0.011062
KU238038.1 Aquilaria crassna voucher FBL G11 WC3 internal transcribed spacer 2 partial sequence	KU244083.1 Aquilaria crassna voucher FBL01013 internal transcribed spacer 1 partial sequence 5.8S ribosomal RNA gene complete sequence and internal transcribed spacer 2 partial sequence_{cra}	0	0
MH134139.1 Aquilaria crassna internal transcribed spacer 1 partial sequence 5.8S ribosomal RNA gene complete sequence and internal transcribed spacer 2 partial sequence	KU244083.1 Aquilaria crassna voucher FBL01013 internal transcribed spacer 1 partial sequence 5.8S ribosomal RNA gene complete sequence and internal transcribed spacer 2 partial sequence_{cra}	0	0
KU244111.1 Aquilaria crassna voucher FBL01017 internal transcribed spacer 2 partial sequence	KU244083.1 Aquilaria crassna voucher FBL01013 internal transcribed spacer 1 partial sequence 5.8S ribosomal RNA gene complete sequence and internal transcribed spacer 2 partial sequence_{cra}	0	0
KU244110.1 Aquilaria crassna voucher FBL01014 internal transcribed spacer 2 partial sequence	KU244083.1 Aquilaria crassna voucher FBL01013 internal transcribed spacer 1 partial sequence 5.8S ribosomal RNA gene complete sequence and internal transcribed spacer 2 partial sequence_{cra}	0	0
KU244109.1 Aquilaria crassna voucher FBL01013 internal transcribed spacer 2 partial sequence	KU244083.1 Aquilaria crassna voucher FBL01013 internal transcribed spacer 1 partial sequence 5.8S ribosomal RNA gene complete sequence and internal transcribed spacer 2 partial sequence_{cra}	0	0
KU244108.1 Aquilaria crassna voucher FBL01012 internal transcribed spacer 2 partial sequence	KU244083.1 Aquilaria crassna voucher FBL01013 internal transcribed spacer 1 partial sequence 5.8S ribosomal RNA gene complete sequence and internal transcribed spacer 2 partial sequence_{cra}	0	0
KU238037.1 Aquilaria crassna voucher FBL G10 WC2 internal transcribed spacer 2 partial sequence	KU244083.1 Aquilaria crassna voucher FBL01013 internal transcribed spacer 1 partial sequence 5.8S ribosomal RNA gene complete sequence and internal transcribed spacer 2 partial sequence_{cra}	0.0027248	0.00273681
KU238035.1 Aquilaria crassna voucher FBL G04 WC1 internal transcribed spacer 2 partial sequence	KU244083.1 Aquilaria crassna voucher FBL01013 internal transcribed spacer 1 partial sequence 5.8S ribosomal RNA gene complete sequence and internal transcribed spacer 2 partial sequence_{cra}	0.0027248	0.00273681
KU244085.1 Aquilaria crassna voucher FBL01017 internal transcribed spacer 1 partial sequence 5.8S ribosomal RNA gene complete sequence and internal transcribed spacer 2 partial sequence	KU244083.1 Aquilaria crassna voucher FBL01013 internal transcribed spacer 1 partial sequence 5.8S ribosomal RNA gene complete sequence and internal transcribed spacer 2 partial sequence_{cra}	0	0
KU244084.1 Aquilaria crassna voucher FBL01014 internal transcribed spacer 1 partial sequence 5.8S ribosomal RNA gene complete sequence and internal transcribed spacer 2 partial sequence	KU244083.1 Aquilaria crassna voucher FBL01013 internal transcribed spacer 1 partial sequence 5.8S ribosomal RNA gene complete sequence and internal transcribed spacer 2 partial sequence_{cra}	0	0
MH134137.1 Aquilaria agallochum internal transcribed spacer 1 partial sequence 5.8S ribosomal RNA gene complete sequence and internal transcribed spacer 2 partial sequence_{aga}	KU244082.1 Aquilaria crassna voucher FBL01012 internal transcribed spacer 1 partial sequence 5.8S ribosomal RNA gene complete sequence and internal transcribed spacer 2 partial sequence	0.0165072	0.0059524
KU879012.1 Aquilaria agallochum 18S ribosomal RNA gene partial sequence internal transcribed spacer 1 5.8S ribosomal RNA gene and internal transcribed spacer 2 complete sequence and 28S ribosomal RNA gene partial sequence_{aga}	KU244082.1 Aquilaria crassna voucher FBL01012 internal transcribed spacer 1 partial sequence 5.8S ribosomal RNA gene complete sequence and internal transcribed spacer 2 partial sequence	0.0221253	0.00719082
MH134138.1 Aquilaria beccariana internal transcribed spacer 1 partial sequence 5.8S ribosomal RNA gene complete sequence and internal transcribed spacer 2 partial sequence_{aga}	KU244082.1 Aquilaria crassna voucher FBL01012 internal transcribed spacer 1 partial sequence 5.8S ribosomal RNA gene complete sequence and internal transcribed spacer 2 partial sequence	0.0220708	0.00727399
KT779116.1 Aquilaria beccariana voucher FBL04001 internal transcribed spacer 1 partial sequence 5.8S ribosomal RNA gene complete sequence and internal transcribed spacer 2 partial sequence_{aga}	KU244082.1 Aquilaria crassna voucher FBL01012 internal transcribed spacer 1 partial sequence 5.8S ribosomal RNA gene complete sequence and internal transcribed spacer 2 partial sequence	0.0421308	0.0101917
KT364477.1 Aquilaria beccariana voucher SFN29381 internal transcribed spacer 1 partial sequence 5.8S ribosomal RNA gene complete sequence and internal transcribed spacer 2 partial sequence_{aga}	KU244082.1 Aquilaria crassna voucher FBL01012 internal transcribed spacer 1 partial sequence 5.8S ribosomal RNA gene complete sequence and internal transcribed spacer 2 partial sequence	0.0221534	0.00722737
KX351419.1 Aquilaria beccariana voucher S1 5.8S ribosomal RNA gene partial sequence internal transcribed spacer 2 complete sequence and large subunit ribosomal RNA gene partial sequence_{aga}	KU244082.1 Aquilaria crassna voucher FBL01012 internal transcribed spacer 1 partial sequence 5.8S ribosomal RNA gene complete sequence and internal transcribed spacer 2 partial sequence	0	0
KX424704.1 Aquilaria beccariana 5.8S ribosomal RNA gene partial sequence internal transcribed spacer 2 complete sequence and 28S ribosomal RNA gene partial sequence_{aga}	KU244082.1 Aquilaria crassna voucher FBL01012 internal transcribed spacer 1 partial sequence 5.8S ribosomal RNA gene complete sequence and internal transcribed spacer 2 partial sequence	0.0438711	0.011062
KU238038.1 Aquilaria crassna voucher FBL G11 WC3 internal transcribed spacer 2 partial sequence	KU244082.1 Aquilaria crassna voucher FBL01012 internal transcribed spacer 1 partial sequence 5.8S ribosomal RNA gene complete sequence and internal transcribed spacer 2 partial sequence	0	0
MH134139.1 Aquilaria crassna internal transcribed spacer 1 partial sequence 5.8S ribosomal RNA gene complete sequence and internal transcribed spacer 2 partial sequence	KU244082.1 Aquilaria crassna voucher FBL01012 internal transcribed spacer 1 partial sequence 5.8S ribosomal RNA gene complete sequence and internal transcribed spacer 2 partial sequence	0	0
KU244111.1 Aquilaria crassna voucher FBL01017 internal transcribed spacer 2 partial sequence	KU244082.1 Aquilaria crassna voucher FBL01012 internal transcribed spacer 1 partial sequence 5.8S ribosomal RNA gene complete sequence and internal transcribed spacer 2 partial sequence	0	0
KU244110.1 Aquilaria crassna voucher FBL01014 internal transcribed spacer 2 partial sequence	KU244082.1 Aquilaria crassna voucher FBL01012 internal transcribed spacer 1 partial sequence 5.8S ribosomal RNA gene complete sequence and internal transcribed spacer 2 partial sequence	0	0
KU244109.1 Aquilaria crassna voucher FBL01013 internal transcribed spacer 2 partial sequence	KU244082.1 Aquilaria crassna voucher FBL01012 internal transcribed spacer 1 partial sequence 5.8S ribosomal RNA gene complete sequence and internal transcribed spacer 2 partial sequence	0	0
KU244108.1 Aquilaria crassna voucher FBL01012 internal transcribed spacer 2 partial sequence	KU244082.1 Aquilaria crassna voucher FBL01012 internal transcribed spacer 1 partial sequence 5.8S ribosomal RNA gene complete sequence and internal transcribed spacer 2 partial sequence	0	0
KU238037.1 Aquilaria crassna voucher FBL G10 WC2 internal transcribed spacer 2 partial sequence	KU244082.1 Aquilaria crassna voucher FBL01012 internal transcribed spacer 1 partial sequence 5.8S ribosomal RNA gene complete sequence and internal transcribed spacer 2 partial sequence	0.0027248	0.00273681
KU238035.1 Aquilaria crassna voucher FBL G04 WC1 internal transcribed spacer 2 partial sequence	KU244082.1 Aquilaria crassna voucher FBL01012 internal transcribed spacer 1 partial sequence 5.8S ribosomal RNA gene complete sequence and internal transcribed spacer 2 partial sequence	0.0027248	0.00273681
KU244085.1 Aquilaria crassna voucher FBL01017 internal transcribed spacer 1 partial sequence 5.8S ribosomal RNA gene complete sequence and internal transcribed spacer 2 partial sequence	KU244082.1 Aquilaria crassna voucher FBL01012 internal transcribed spacer 1 partial sequence 5.8S ribosomal RNA gene complete sequence and internal transcribed spacer 2 partial sequence	0	0
KU244084.1 Aquilaria crassna voucher FBL01014 internal transcribed spacer 1 partial sequence 5.8S ribosomal RNA gene complete sequence and internal transcribed spacer 2 partial sequence	KU244082.1 Aquilaria crassna voucher FBL01012 internal transcribed spacer 1 partial sequence 5.8S ribosomal RNA gene complete sequence and internal transcribed spacer 2 partial sequence	0	0
KU244083.1 Aquilaria crassna voucher FBL01013 internal transcribed spacer 1 partial sequence 5.8S ribosomal RNA gene complete sequence and internal transcribed spacer 2 partial sequence_{cra}	KU244082.1 Aquilaria crassna voucher FBL01012 internal transcribed spacer 1 partial sequence 5.8S ribosomal RNA gene complete sequence and internal transcribed spacer 2 partial sequence	0	0
MH134137.1 Aquilaria agallochum internal transcribed spacer 1 partial sequence 5.8S ribosomal RNA gene complete sequence and internal transcribed spacer 2 partial sequence_{aga}	KT364478.1 Aquilaria crassna voucher FBL01012 internal transcribed spacer 1 partial sequence 5.8S ribosomal RNA gene complete sequence and internal transcribed spacer 2 partial sequence	0.0165072	0.0059524
KU879012.1 Aquilaria agallochum 18S ribosomal RNA gene partial sequence internal transcribed spacer 1 5.8S ribosomal RNA gene and internal transcribed spacer 2 complete sequence and 28S ribosomal RNA gene partial sequence_{aga}	KT364478.1 Aquilaria crassna voucher FBL01012 internal transcribed spacer 1 partial sequence 5.8S ribosomal RNA gene complete sequence and internal transcribed spacer 2 partial sequence	0.0221253	0.00719082
MH134138.1 Aquilaria beccariana internal transcribed spacer 1 partial sequence 5.8S ribosomal RNA gene complete sequence and internal transcribed spacer 2 partial sequence_{aga}	KT364478.1 Aquilaria crassna voucher FBL01012 internal transcribed spacer 1 partial sequence 5.8S ribosomal RNA gene complete sequence and internal transcribed spacer 2 partial sequence	0.0220708	0.00727399
KT779116.1 Aquilaria beccariana voucher FBL04001 internal transcribed spacer 1 partial sequence 5.8S ribosomal RNA gene complete sequence and internal transcribed spacer 2 partial sequence_{aga}	KT364478.1 Aquilaria crassna voucher FBL01012 internal transcribed spacer 1 partial sequence 5.8S ribosomal RNA gene complete sequence and internal transcribed spacer 2 partial sequence	0.0421308	0.0101917
KT364477.1 Aquilaria beccariana voucher SFN29381 internal transcribed spacer 1 partial sequence 5.8S ribosomal RNA gene complete sequence and internal transcribed spacer 2 partial sequence_{aga}	KT364478.1 Aquilaria crassna voucher FBL01012 internal transcribed spacer 1 partial sequence 5.8S ribosomal RNA gene complete sequence and internal transcribed spacer 2 partial sequence	0.0221534	0.00722737
KX351419.1 Aquilaria beccariana voucher S1 5.8S ribosomal RNA gene partial sequence internal transcribed spacer 2 complete sequence and large subunit ribosomal RNA gene partial sequence_{aga}	KT364478.1 Aquilaria crassna voucher FBL01012 internal transcribed spacer 1 partial sequence 5.8S ribosomal RNA gene complete sequence and internal transcribed spacer 2 partial sequence	0	0
KX424704.1 Aquilaria beccariana 5.8S ribosomal RNA gene partial sequence internal transcribed spacer 2 complete sequence and 28S ribosomal RNA gene partial sequence_{aga}	KT364478.1 Aquilaria crassna voucher FBL01012 internal transcribed spacer 1 partial sequence 5.8S ribosomal RNA gene complete sequence and internal transcribed spacer 2 partial sequence	0.0438711	0.011062
KU238038.1 Aquilaria crassna voucher FBL G11 WC3 internal transcribed spacer 2 partial sequence	KT364478.1 Aquilaria crassna voucher FBL01012 internal transcribed spacer 1 partial sequence 5.8S ribosomal RNA gene complete sequence and internal transcribed spacer 2 partial sequence	0	0
MH134139.1 Aquilaria crassna internal transcribed spacer 1 partial sequence 5.8S ribosomal RNA gene complete sequence and internal transcribed spacer 2 partial sequence	KT364478.1 Aquilaria crassna voucher FBL01012 internal transcribed spacer 1 partial sequence 5.8S ribosomal RNA gene complete sequence and internal transcribed spacer 2 partial sequence	0	0
KU244111.1 Aquilaria crassna voucher FBL01017 internal transcribed spacer 2 partial sequence	KT364478.1 Aquilaria crassna voucher FBL01012 internal transcribed spacer 1 partial sequence 5.8S ribosomal RNA gene complete sequence and internal transcribed spacer 2 partial sequence	0	0
KU244110.1 Aquilaria crassna voucher FBL01014 internal transcribed spacer 2 partial sequence	KT364478.1 Aquilaria crassna voucher FBL01012 internal transcribed spacer 1 partial sequence 5.8S ribosomal RNA gene complete sequence and internal transcribed spacer 2 partial sequence	0	0
KU244109.1 Aquilaria crassna voucher FBL01013 internal transcribed spacer 2 partial sequence	KT364478.1 Aquilaria crassna voucher FBL01012 internal transcribed spacer 1 partial sequence 5.8S ribosomal RNA gene complete sequence and internal transcribed spacer 2 partial sequence	0	0
KU244108.1 Aquilaria crassna voucher FBL01012 internal transcribed spacer 2 partial sequence	KT364478.1 Aquilaria crassna voucher FBL01012 internal transcribed spacer 1 partial sequence 5.8S ribosomal RNA gene complete sequence and internal transcribed spacer 2 partial sequence	0	0
KU238037.1 Aquilaria crassna voucher FBL G10 WC2 internal transcribed spacer 2 partial sequence	KT364478.1 Aquilaria crassna voucher FBL01012 internal transcribed spacer 1 partial sequence 5.8S ribosomal RNA gene complete sequence and internal transcribed spacer 2 partial sequence	0.0027248	0.00273681
KU238035.1 Aquilaria crassna voucher FBL G04 WC1 internal transcribed spacer 2 partial sequence	KT364478.1 Aquilaria crassna voucher FBL01012 internal transcribed spacer 1 partial sequence 5.8S ribosomal RNA gene complete sequence and internal transcribed spacer 2 partial sequence	0.0027248	0.00273681
KU244085.1 Aquilaria crassna voucher FBL01017 internal transcribed spacer 1 partial sequence 5.8S ribosomal RNA gene complete sequence and internal transcribed spacer 2 partial sequence	KT364478.1 Aquilaria crassna voucher FBL01012 internal transcribed spacer 1 partial sequence 5.8S ribosomal RNA gene complete sequence and internal transcribed spacer 2 partial sequence	0	0
KU244084.1 Aquilaria crassna voucher FBL01014 internal transcribed spacer 1 partial sequence 5.8S ribosomal RNA gene complete sequence and internal transcribed spacer 2 partial sequence	KT364478.1 Aquilaria crassna voucher FBL01012 internal transcribed spacer 1 partial sequence 5.8S ribosomal RNA gene complete sequence and internal transcribed spacer 2 partial sequence	0	0
KU244083.1 Aquilaria crassna voucher FBL01013 internal transcribed spacer 1 partial sequence 5.8S ribosomal RNA gene complete sequence and internal transcribed spacer 2 partial sequence_{cra}	KT364478.1 Aquilaria crassna voucher FBL01012 internal transcribed spacer 1 partial sequence 5.8S ribosomal RNA gene complete sequence and internal transcribed spacer 2 partial sequence	0	0
KU244082.1 Aquilaria crassna voucher FBL01012 internal transcribed spacer 1 partial sequence 5.8S ribosomal RNA gene complete sequence and internal transcribed spacer 2 partial sequence	KT364478.1 Aquilaria crassna voucher FBL01012 internal transcribed spacer 1 partial sequence 5.8S ribosomal RNA gene complete sequence and internal transcribed spacer 2 partial sequence	0	0
MH134137.1 Aquilaria agallochum internal transcribed spacer 1 partial sequence 5.8S ribosomal RNA gene complete sequence and internal transcribed spacer 2 partial sequence_{aga}	KY817982.1 Aquilaria crassna voucher S-9 small subunit ribosomal RNA gene partial sequence internal transcribed spacer 1 5.8S ribosomal RNA gene and internal transcribed spacer 2 complete sequence and large subunit ribosomal RNA gene partial sequence	0.0165072	0.0059524
KU879012.1 Aquilaria agallochum 18S ribosomal RNA gene partial sequence internal transcribed spacer 1 5.8S ribosomal RNA gene and internal transcribed spacer 2 complete sequence and 28S ribosomal RNA gene partial sequence_{aga}	KY817982.1 Aquilaria crassna voucher S-9 small subunit ribosomal RNA gene partial sequence internal transcribed spacer 1 5.8S ribosomal RNA gene and internal transcribed spacer 2 complete sequence and large subunit ribosomal RNA gene partial sequence	0.0221253	0.00719082
MH134138.1 Aquilaria beccariana internal transcribed spacer 1 partial sequence 5.8S ribosomal RNA gene complete sequence and internal transcribed spacer 2 partial sequence_{aga}	KY817982.1 Aquilaria crassna voucher S-9 small subunit ribosomal RNA gene partial sequence internal transcribed spacer 1 5.8S ribosomal RNA gene and internal transcribed spacer 2 complete sequence and large subunit ribosomal RNA gene partial sequence	0.0220708	0.00727399
KT779116.1 Aquilaria beccariana voucher FBL04001 internal transcribed spacer 1 partial sequence 5.8S ribosomal RNA gene complete sequence and internal transcribed spacer 2 partial sequence_{aga}	KY817982.1 Aquilaria crassna voucher S-9 small subunit ribosomal RNA gene partial sequence internal transcribed spacer 1 5.8S ribosomal RNA gene and internal transcribed spacer 2 complete sequence and large subunit ribosomal RNA gene partial sequence	0.0421308	0.0101917
KT364477.1 Aquilaria beccariana voucher SFN29381 internal transcribed spacer 1 partial sequence 5.8S ribosomal RNA gene complete sequence and internal transcribed spacer 2 partial sequence_{aga}	KY817982.1 Aquilaria crassna voucher S-9 small subunit ribosomal RNA gene partial sequence internal transcribed spacer 1 5.8S ribosomal RNA gene and internal transcribed spacer 2 complete sequence and large subunit ribosomal RNA gene partial sequence	0.0221534	0.00722737
KX351419.1 Aquilaria beccariana voucher S1 5.8S ribosomal RNA gene partial sequence internal transcribed spacer 2 complete sequence and large subunit ribosomal RNA gene partial sequence_{aga}	KY817982.1 Aquilaria crassna voucher S-9 small subunit ribosomal RNA gene partial sequence internal transcribed spacer 1 5.8S ribosomal RNA gene and internal transcribed spacer 2 complete sequence and large subunit ribosomal RNA gene partial sequence	0	0
KX424704.1 Aquilaria beccariana 5.8S ribosomal RNA gene partial sequence internal transcribed spacer 2 complete sequence and 28S ribosomal RNA gene partial sequence_{aga}	KY817982.1 Aquilaria crassna voucher S-9 small subunit ribosomal RNA gene partial sequence internal transcribed spacer 1 5.8S ribosomal RNA gene and internal transcribed spacer 2 complete sequence and large subunit ribosomal RNA gene partial sequence	0.0438711	0.011062
KU238038.1 Aquilaria crassna voucher FBL G11 WC3 internal transcribed spacer 2 partial sequence	KY817982.1 Aquilaria crassna voucher S-9 small subunit ribosomal RNA gene partial sequence internal transcribed spacer 1 5.8S ribosomal RNA gene and internal transcribed spacer 2 complete sequence and large subunit ribosomal RNA gene partial sequence	0	0
MH134139.1 Aquilaria crassna internal transcribed spacer 1 partial sequence 5.8S ribosomal RNA gene complete sequence and internal transcribed spacer 2 partial sequence	KY817982.1 Aquilaria crassna voucher S-9 small subunit ribosomal RNA gene partial sequence internal transcribed spacer 1 5.8S ribosomal RNA gene and internal transcribed spacer 2 complete sequence and large subunit ribosomal RNA gene partial sequence	0	0
KU244111.1 Aquilaria crassna voucher FBL01017 internal transcribed spacer 2 partial sequence	KY817982.1 Aquilaria crassna voucher S-9 small subunit ribosomal RNA gene partial sequence internal transcribed spacer 1 5.8S ribosomal RNA gene and internal transcribed spacer 2 complete sequence and large subunit ribosomal RNA gene partial sequence	0	0
KU244110.1 Aquilaria crassna voucher FBL01014 internal transcribed spacer 2 partial sequence	KY817982.1 Aquilaria crassna voucher S-9 small subunit ribosomal RNA gene partial sequence internal transcribed spacer 1 5.8S ribosomal RNA gene and internal transcribed spacer 2 complete sequence and large subunit ribosomal RNA gene partial sequence	0	0
KU244109.1 Aquilaria crassna voucher FBL01013 internal transcribed spacer 2 partial sequence	KY817982.1 Aquilaria crassna voucher S-9 small subunit ribosomal RNA gene partial sequence internal transcribed spacer 1 5.8S ribosomal RNA gene and internal transcribed spacer 2 complete sequence and large subunit ribosomal RNA gene partial sequence	0	0
KU244108.1 Aquilaria crassna voucher FBL01012 internal transcribed spacer 2 partial sequence	KY817982.1 Aquilaria crassna voucher S-9 small subunit ribosomal RNA gene partial sequence internal transcribed spacer 1 5.8S ribosomal RNA gene and internal transcribed spacer 2 complete sequence and large subunit ribosomal RNA gene partial sequence	0	0
KU238037.1 Aquilaria crassna voucher FBL G10 WC2 internal transcribed spacer 2 partial sequence	KY817982.1 Aquilaria crassna voucher S-9 small subunit ribosomal RNA gene partial sequence internal transcribed spacer 1 5.8S ribosomal RNA gene and internal transcribed spacer 2 complete sequence and large subunit ribosomal RNA gene partial sequence	0.0027248	0.00273681
KU238035.1 Aquilaria crassna voucher FBL G04 WC1 internal transcribed spacer 2 partial sequence	KY817982.1 Aquilaria crassna voucher S-9 small subunit ribosomal RNA gene partial sequence internal transcribed spacer 1 5.8S ribosomal RNA gene and internal transcribed spacer 2 complete sequence and large subunit ribosomal RNA gene partial sequence	0.0027248	0.00273681
KU244085.1 Aquilaria crassna voucher FBL01017 internal transcribed spacer 1 partial sequence 5.8S ribosomal RNA gene complete sequence and internal transcribed spacer 2 partial sequence	KY817982.1 Aquilaria crassna voucher S-9 small subunit ribosomal RNA gene partial sequence internal transcribed spacer 1 5.8S ribosomal RNA gene and internal transcribed spacer 2 complete sequence and large subunit ribosomal RNA gene partial sequence	0	0
KU244084.1 Aquilaria crassna voucher FBL01014 internal transcribed spacer 1 partial sequence 5.8S ribosomal RNA gene complete sequence and internal transcribed spacer 2 partial sequence	KY817982.1 Aquilaria crassna voucher S-9 small subunit ribosomal RNA gene partial sequence internal transcribed spacer 1 5.8S ribosomal RNA gene and internal transcribed spacer 2 complete sequence and large subunit ribosomal RNA gene partial sequence	0	0
KU244083.1 Aquilaria crassna voucher FBL01013 internal transcribed spacer 1 partial sequence 5.8S ribosomal RNA gene complete sequence and internal transcribed spacer 2 partial sequence_{cra}	KY817982.1 Aquilaria crassna voucher S-9 small subunit ribosomal RNA gene partial sequence internal transcribed spacer 1 5.8S ribosomal RNA gene and internal transcribed spacer 2 complete sequence and large subunit ribosomal RNA gene partial sequence	0	0
KU244082.1 Aquilaria crassna voucher FBL01012 internal transcribed spacer 1 partial sequence 5.8S ribosomal RNA gene complete sequence and internal transcribed spacer 2 partial sequence	KY817982.1 Aquilaria crassna voucher S-9 small subunit ribosomal RNA gene partial sequence internal transcribed spacer 1 5.8S ribosomal RNA gene and internal transcribed spacer 2 complete sequence and large subunit ribosomal RNA gene partial sequence	0	0
KT364478.1 Aquilaria crassna voucher FBL01012 internal transcribed spacer 1 partial sequence 5.8S ribosomal RNA gene complete sequence and internal transcribed spacer 2 partial sequence	KY817982.1 Aquilaria crassna voucher S-9 small subunit ribosomal RNA gene partial sequence internal transcribed spacer 1 5.8S ribosomal RNA gene and internal transcribed spacer 2 complete sequence and large subunit ribosomal RNA gene partial sequence	0	0
MH134137.1 Aquilaria agallochum internal transcribed spacer 1 partial sequence 5.8S ribosomal RNA gene complete sequence and internal transcribed spacer 2 partial sequence_{aga}	KY817979.1 Aquilaria crassna voucher S-1 small subunit ribosomal RNA gene partial sequence internal transcribed spacer 1 5.8S ribosomal RNA gene and internal transcribed spacer 2 complete sequence and large subunit ribosomal RNA gene partial sequence	0.0165072	0.0059524
KU879012.1 Aquilaria agallochum 18S ribosomal RNA gene partial sequence internal transcribed spacer 1 5.8S ribosomal RNA gene and internal transcribed spacer 2 complete sequence and 28S ribosomal RNA gene partial sequence_{aga}	KY817979.1 Aquilaria crassna voucher S-1 small subunit ribosomal RNA gene partial sequence internal transcribed spacer 1 5.8S ribosomal RNA gene and internal transcribed spacer 2 complete sequence and large subunit ribosomal RNA gene partial sequence	0.0221253	0.00719082
MH134138.1 Aquilaria beccariana internal transcribed spacer 1 partial sequence 5.8S ribosomal RNA gene complete sequence and internal transcribed spacer 2 partial sequence_{aga}	KY817979.1 Aquilaria crassna voucher S-1 small subunit ribosomal RNA gene partial sequence internal transcribed spacer 1 5.8S ribosomal RNA gene and internal transcribed spacer 2 complete sequence and large subunit ribosomal RNA gene partial sequence	0.0220708	0.00727399
KT779116.1 Aquilaria beccariana voucher FBL04001 internal transcribed spacer 1 partial sequence 5.8S ribosomal RNA gene complete sequence and internal transcribed spacer 2 partial sequence_{aga}	KY817979.1 Aquilaria crassna voucher S-1 small subunit ribosomal RNA gene partial sequence internal transcribed spacer 1 5.8S ribosomal RNA gene and internal transcribed spacer 2 complete sequence and large subunit ribosomal RNA gene partial sequence	0.0421308	0.0101917
KT364477.1 Aquilaria beccariana voucher SFN29381 internal transcribed spacer 1 partial sequence 5.8S ribosomal RNA gene complete sequence and internal transcribed spacer 2 partial sequence_{aga}	KY817979.1 Aquilaria crassna voucher S-1 small subunit ribosomal RNA gene partial sequence internal transcribed spacer 1 5.8S ribosomal RNA gene and internal transcribed spacer 2 complete sequence and large subunit ribosomal RNA gene partial sequence	0.0221534	0.00722737
KX351419.1 Aquilaria beccariana voucher S1 5.8S ribosomal RNA gene partial sequence internal transcribed spacer 2 complete sequence and large subunit ribosomal RNA gene partial sequence_{aga}	KY817979.1 Aquilaria crassna voucher S-1 small subunit ribosomal RNA gene partial sequence internal transcribed spacer 1 5.8S ribosomal RNA gene and internal transcribed spacer 2 complete sequence and large subunit ribosomal RNA gene partial sequence	0	0
KX424704.1 Aquilaria beccariana 5.8S ribosomal RNA gene partial sequence internal transcribed spacer 2 complete sequence and 28S ribosomal RNA gene partial sequence_{aga}	KY817979.1 Aquilaria crassna voucher S-1 small subunit ribosomal RNA gene partial sequence internal transcribed spacer 1 5.8S ribosomal RNA gene and internal transcribed spacer 2 complete sequence and large subunit ribosomal RNA gene partial sequence	0.0438711	0.011062
KU238038.1 Aquilaria crassna voucher FBL G11 WC3 internal transcribed spacer 2 partial sequence	KY817979.1 Aquilaria crassna voucher S-1 small subunit ribosomal RNA gene partial sequence internal transcribed spacer 1 5.8S ribosomal RNA gene and internal transcribed spacer 2 complete sequence and large subunit ribosomal RNA gene partial sequence	0	0
MH134139.1 Aquilaria crassna internal transcribed spacer 1 partial sequence 5.8S ribosomal RNA gene complete sequence and internal transcribed spacer 2 partial sequence	KY817979.1 Aquilaria crassna voucher S-1 small subunit ribosomal RNA gene partial sequence internal transcribed spacer 1 5.8S ribosomal RNA gene and internal transcribed spacer 2 complete sequence and large subunit ribosomal RNA gene partial sequence	0	0
KU244111.1 Aquilaria crassna voucher FBL01017 internal transcribed spacer 2 partial sequence	KY817979.1 Aquilaria crassna voucher S-1 small subunit ribosomal RNA gene partial sequence internal transcribed spacer 1 5.8S ribosomal RNA gene and internal transcribed spacer 2 complete sequence and large subunit ribosomal RNA gene partial sequence	0	0
KU244110.1 Aquilaria crassna voucher FBL01014 internal transcribed spacer 2 partial sequence	KY817979.1 Aquilaria crassna voucher S-1 small subunit ribosomal RNA gene partial sequence internal transcribed spacer 1 5.8S ribosomal RNA gene and internal transcribed spacer 2 complete sequence and large subunit ribosomal RNA gene partial sequence	0	0
KU244109.1 Aquilaria crassna voucher FBL01013 internal transcribed spacer 2 partial sequence	KY817979.1 Aquilaria crassna voucher S-1 small subunit ribosomal RNA gene partial sequence internal transcribed spacer 1 5.8S ribosomal RNA gene and internal transcribed spacer 2 complete sequence and large subunit ribosomal RNA gene partial sequence	0	0
KU244108.1 Aquilaria crassna voucher FBL01012 internal transcribed spacer 2 partial sequence	KY817979.1 Aquilaria crassna voucher S-1 small subunit ribosomal RNA gene partial sequence internal transcribed spacer 1 5.8S ribosomal RNA gene and internal transcribed spacer 2 complete sequence and large subunit ribosomal RNA gene partial sequence	0	0
KU238037.1 Aquilaria crassna voucher FBL G10 WC2 internal transcribed spacer 2 partial sequence	KY817979.1 Aquilaria crassna voucher S-1 small subunit ribosomal RNA gene partial sequence internal transcribed spacer 1 5.8S ribosomal RNA gene and internal transcribed spacer 2 complete sequence and large subunit ribosomal RNA gene partial sequence	0.0027248	0.00273681
KU238035.1 Aquilaria crassna voucher FBL G04 WC1 internal transcribed spacer 2 partial sequence	KY817979.1 Aquilaria crassna voucher S-1 small subunit ribosomal RNA gene partial sequence internal transcribed spacer 1 5.8S ribosomal RNA gene and internal transcribed spacer 2 complete sequence and large subunit ribosomal RNA gene partial sequence	0.0027248	0.00273681
KU244085.1 Aquilaria crassna voucher FBL01017 internal transcribed spacer 1 partial sequence 5.8S ribosomal RNA gene complete sequence and internal transcribed spacer 2 partial sequence	KY817979.1 Aquilaria crassna voucher S-1 small subunit ribosomal RNA gene partial sequence internal transcribed spacer 1 5.8S ribosomal RNA gene and internal transcribed spacer 2 complete sequence and large subunit ribosomal RNA gene partial sequence	0	0
KU244084.1 Aquilaria crassna voucher FBL01014 internal transcribed spacer 1 partial sequence 5.8S ribosomal RNA gene complete sequence and internal transcribed spacer 2 partial sequence	KY817979.1 Aquilaria crassna voucher S-1 small subunit ribosomal RNA gene partial sequence internal transcribed spacer 1 5.8S ribosomal RNA gene and internal transcribed spacer 2 complete sequence and large subunit ribosomal RNA gene partial sequence	0	0
KU244083.1 Aquilaria crassna voucher FBL01013 internal transcribed spacer 1 partial sequence 5.8S ribosomal RNA gene complete sequence and internal transcribed spacer 2 partial sequence_{cra}	KY817979.1 Aquilaria crassna voucher S-1 small subunit ribosomal RNA gene partial sequence internal transcribed spacer 1 5.8S ribosomal RNA gene and internal transcribed spacer 2 complete sequence and large subunit ribosomal RNA gene partial sequence	0	0
KU244082.1 Aquilaria crassna voucher FBL01012 internal transcribed spacer 1 partial sequence 5.8S ribosomal RNA gene complete sequence and internal transcribed spacer 2 partial sequence	KY817979.1 Aquilaria crassna voucher S-1 small subunit ribosomal RNA gene partial sequence internal transcribed spacer 1 5.8S ribosomal RNA gene and internal transcribed spacer 2 complete sequence and large subunit ribosomal RNA gene partial sequence	0	0
KT364478.1 Aquilaria crassna voucher FBL01012 internal transcribed spacer 1 partial sequence 5.8S ribosomal RNA gene complete sequence and internal transcribed spacer 2 partial sequence	KY817979.1 Aquilaria crassna voucher S-1 small subunit ribosomal RNA gene partial sequence internal transcribed spacer 1 5.8S ribosomal RNA gene and internal transcribed spacer 2 complete sequence and large subunit ribosomal RNA gene partial sequence	0	0
KY817982.1 Aquilaria crassna voucher S-9 small subunit ribosomal RNA gene partial sequence internal transcribed spacer 1 5.8S ribosomal RNA gene and internal transcribed spacer 2 complete sequence and large subunit ribosomal RNA gene partial sequence	KY817979.1 Aquilaria crassna voucher S-1 small subunit ribosomal RNA gene partial sequence internal transcribed spacer 1 5.8S ribosomal RNA gene and internal transcribed spacer 2 complete sequence and large subunit ribosomal RNA gene partial sequence	0	0
MH134137.1 Aquilaria agallochum internal transcribed spacer 1 partial sequence 5.8S ribosomal RNA gene complete sequence and internal transcribed spacer 2 partial sequence_{aga}	KY817973.1 Aquilaria crassna voucher ML-9 small subunit ribosomal RNA gene partial sequence internal transcribed spacer 1 5.8S ribosomal RNA gene and internal transcribed spacer 2 complete sequence and large subunit ribosomal RNA gene partial sequence	0.0165072	0.0059524
KU879012.1 Aquilaria agallochum 18S ribosomal RNA gene partial sequence internal transcribed spacer 1 5.8S ribosomal RNA gene and internal transcribed spacer 2 complete sequence and 28S ribosomal RNA gene partial sequence_{aga}	KY817973.1 Aquilaria crassna voucher ML-9 small subunit ribosomal RNA gene partial sequence internal transcribed spacer 1 5.8S ribosomal RNA gene and internal transcribed spacer 2 complete sequence and large subunit ribosomal RNA gene partial sequence	0.0221253	0.00719082
MH134138.1 Aquilaria beccariana internal transcribed spacer 1 partial sequence 5.8S ribosomal RNA gene complete sequence and internal transcribed spacer 2 partial sequence_{aga}	KY817973.1 Aquilaria crassna voucher ML-9 small subunit ribosomal RNA gene partial sequence internal transcribed spacer 1 5.8S ribosomal RNA gene and internal transcribed spacer 2 complete sequence and large subunit ribosomal RNA gene partial sequence	0.0220708	0.00727399
KT779116.1 Aquilaria beccariana voucher FBL04001 internal transcribed spacer 1 partial sequence 5.8S ribosomal RNA gene complete sequence and internal transcribed spacer 2 partial sequence_{aga}	KY817973.1 Aquilaria crassna voucher ML-9 small subunit ribosomal RNA gene partial sequence internal transcribed spacer 1 5.8S ribosomal RNA gene and internal transcribed spacer 2 complete sequence and large subunit ribosomal RNA gene partial sequence	0.0421308	0.0101917
KT364477.1 Aquilaria beccariana voucher SFN29381 internal transcribed spacer 1 partial sequence 5.8S ribosomal RNA gene complete sequence and internal transcribed spacer 2 partial sequence_{aga}	KY817973.1 Aquilaria crassna voucher ML-9 small subunit ribosomal RNA gene partial sequence internal transcribed spacer 1 5.8S ribosomal RNA gene and internal transcribed spacer 2 complete sequence and large subunit ribosomal RNA gene partial sequence	0.0221534	0.00722737
KX351419.1 Aquilaria beccariana voucher S1 5.8S ribosomal RNA gene partial sequence internal transcribed spacer 2 complete sequence and large subunit ribosomal RNA gene partial sequence_{aga}	KY817973.1 Aquilaria crassna voucher ML-9 small subunit ribosomal RNA gene partial sequence internal transcribed spacer 1 5.8S ribosomal RNA gene and internal transcribed spacer 2 complete sequence and large subunit ribosomal RNA gene partial sequence	0	0
KX424704.1 Aquilaria beccariana 5.8S ribosomal RNA gene partial sequence internal transcribed spacer 2 complete sequence and 28S ribosomal RNA gene partial sequence_{aga}	KY817973.1 Aquilaria crassna voucher ML-9 small subunit ribosomal RNA gene partial sequence internal transcribed spacer 1 5.8S ribosomal RNA gene and internal transcribed spacer 2 complete sequence and large subunit ribosomal RNA gene partial sequence	0.0438711	0.011062
KU238038.1 Aquilaria crassna voucher FBL G11 WC3 internal transcribed spacer 2 partial sequence	KY817973.1 Aquilaria crassna voucher ML-9 small subunit ribosomal RNA gene partial sequence internal transcribed spacer 1 5.8S ribosomal RNA gene and internal transcribed spacer 2 complete sequence and large subunit ribosomal RNA gene partial sequence	0	0
MH134139.1 Aquilaria crassna internal transcribed spacer 1 partial sequence 5.8S ribosomal RNA gene complete sequence and internal transcribed spacer 2 partial sequence	KY817973.1 Aquilaria crassna voucher ML-9 small subunit ribosomal RNA gene partial sequence internal transcribed spacer 1 5.8S ribosomal RNA gene and internal transcribed spacer 2 complete sequence and large subunit ribosomal RNA gene partial sequence	0	0
KU244111.1 Aquilaria crassna voucher FBL01017 internal transcribed spacer 2 partial sequence	KY817973.1 Aquilaria crassna voucher ML-9 small subunit ribosomal RNA gene partial sequence internal transcribed spacer 1 5.8S ribosomal RNA gene and internal transcribed spacer 2 complete sequence and large subunit ribosomal RNA gene partial sequence	0	0
KU244110.1 Aquilaria crassna voucher FBL01014 internal transcribed spacer 2 partial sequence	KY817973.1 Aquilaria crassna voucher ML-9 small subunit ribosomal RNA gene partial sequence internal transcribed spacer 1 5.8S ribosomal RNA gene and internal transcribed spacer 2 complete sequence and large subunit ribosomal RNA gene partial sequence	0	0
KU244109.1 Aquilaria crassna voucher FBL01013 internal transcribed spacer 2 partial sequence	KY817973.1 Aquilaria crassna voucher ML-9 small subunit ribosomal RNA gene partial sequence internal transcribed spacer 1 5.8S ribosomal RNA gene and internal transcribed spacer 2 complete sequence and large subunit ribosomal RNA gene partial sequence	0	0
KU244108.1 Aquilaria crassna voucher FBL01012 internal transcribed spacer 2 partial sequence	KY817973.1 Aquilaria crassna voucher ML-9 small subunit ribosomal RNA gene partial sequence internal transcribed spacer 1 5.8S ribosomal RNA gene and internal transcribed spacer 2 complete sequence and large subunit ribosomal RNA gene partial sequence	0	0
KU238037.1 Aquilaria crassna voucher FBL G10 WC2 internal transcribed spacer 2 partial sequence	KY817973.1 Aquilaria crassna voucher ML-9 small subunit ribosomal RNA gene partial sequence internal transcribed spacer 1 5.8S ribosomal RNA gene and internal transcribed spacer 2 complete sequence and large subunit ribosomal RNA gene partial sequence	0.0027248	0.00273681
KU238035.1 Aquilaria crassna voucher FBL G04 WC1 internal transcribed spacer 2 partial sequence	KY817973.1 Aquilaria crassna voucher ML-9 small subunit ribosomal RNA gene partial sequence internal transcribed spacer 1 5.8S ribosomal RNA gene and internal transcribed spacer 2 complete sequence and large subunit ribosomal RNA gene partial sequence	0.0027248	0.00273681
KU244085.1 Aquilaria crassna voucher FBL01017 internal transcribed spacer 1 partial sequence 5.8S ribosomal RNA gene complete sequence and internal transcribed spacer 2 partial sequence	KY817973.1 Aquilaria crassna voucher ML-9 small subunit ribosomal RNA gene partial sequence internal transcribed spacer 1 5.8S ribosomal RNA gene and internal transcribed spacer 2 complete sequence and large subunit ribosomal RNA gene partial sequence	0	0
KU244084.1 Aquilaria crassna voucher FBL01014 internal transcribed spacer 1 partial sequence 5.8S ribosomal RNA gene complete sequence and internal transcribed spacer 2 partial sequence	KY817973.1 Aquilaria crassna voucher ML-9 small subunit ribosomal RNA gene partial sequence internal transcribed spacer 1 5.8S ribosomal RNA gene and internal transcribed spacer 2 complete sequence and large subunit ribosomal RNA gene partial sequence	0	0
KU244083.1 Aquilaria crassna voucher FBL01013 internal transcribed spacer 1 partial sequence 5.8S ribosomal RNA gene complete sequence and internal transcribed spacer 2 partial sequence_{cra}	KY817973.1 Aquilaria crassna voucher ML-9 small subunit ribosomal RNA gene partial sequence internal transcribed spacer 1 5.8S ribosomal RNA gene and internal transcribed spacer 2 complete sequence and large subunit ribosomal RNA gene partial sequence	0	0
KU244082.1 Aquilaria crassna voucher FBL01012 internal transcribed spacer 1 partial sequence 5.8S ribosomal RNA gene complete sequence and internal transcribed spacer 2 partial sequence	KY817973.1 Aquilaria crassna voucher ML-9 small subunit ribosomal RNA gene partial sequence internal transcribed spacer 1 5.8S ribosomal RNA gene and internal transcribed spacer 2 complete sequence and large subunit ribosomal RNA gene partial sequence	0	0
KT364478.1 Aquilaria crassna voucher FBL01012 internal transcribed spacer 1 partial sequence 5.8S ribosomal RNA gene complete sequence and internal transcribed spacer 2 partial sequence	KY817973.1 Aquilaria crassna voucher ML-9 small subunit ribosomal RNA gene partial sequence internal transcribed spacer 1 5.8S ribosomal RNA gene and internal transcribed spacer 2 complete sequence and large subunit ribosomal RNA gene partial sequence	0	0
KY817982.1 Aquilaria crassna voucher S-9 small subunit ribosomal RNA gene partial sequence internal transcribed spacer 1 5.8S ribosomal RNA gene and internal transcribed spacer 2 complete sequence and large subunit ribosomal RNA gene partial sequence	KY817973.1 Aquilaria crassna voucher ML-9 small subunit ribosomal RNA gene partial sequence internal transcribed spacer 1 5.8S ribosomal RNA gene and internal transcribed spacer 2 complete sequence and large subunit ribosomal RNA gene partial sequence	0	0
KY817979.1 Aquilaria crassna voucher S-1 small subunit ribosomal RNA gene partial sequence internal transcribed spacer 1 5.8S ribosomal RNA gene and internal transcribed spacer 2 complete sequence and large subunit ribosomal RNA gene partial sequence	KY817973.1 Aquilaria crassna voucher ML-9 small subunit ribosomal RNA gene partial sequence internal transcribed spacer 1 5.8S ribosomal RNA gene and internal transcribed spacer 2 complete sequence and large subunit ribosomal RNA gene partial sequence	0	0
MH134137.1 Aquilaria agallochum internal transcribed spacer 1 partial sequence 5.8S ribosomal RNA gene complete sequence and internal transcribed spacer 2 partial sequence_{aga}	KY817972.1 Aquilaria crassna voucher ML-8 small subunit ribosomal RNA gene partial sequence internal transcribed spacer 1 5.8S ribosomal RNA gene and internal transcribed spacer 2 complete sequence and large subunit ribosomal RNA gene partial sequence	0.0165072	0.0059524
KU879012.1 Aquilaria agallochum 18S ribosomal RNA gene partial sequence internal transcribed spacer 1 5.8S ribosomal RNA gene and internal transcribed spacer 2 complete sequence and 28S ribosomal RNA gene partial sequence_{aga}	KY817972.1 Aquilaria crassna voucher ML-8 small subunit ribosomal RNA gene partial sequence internal transcribed spacer 1 5.8S ribosomal RNA gene and internal transcribed spacer 2 complete sequence and large subunit ribosomal RNA gene partial sequence	0.0221253	0.00719082
MH134138.1 Aquilaria beccariana internal transcribed spacer 1 partial sequence 5.8S ribosomal RNA gene complete sequence and internal transcribed spacer 2 partial sequence_{aga}	KY817972.1 Aquilaria crassna voucher ML-8 small subunit ribosomal RNA gene partial sequence internal transcribed spacer 1 5.8S ribosomal RNA gene and internal transcribed spacer 2 complete sequence and large subunit ribosomal RNA gene partial sequence	0.0220708	0.00727399
KT779116.1 Aquilaria beccariana voucher FBL04001 internal transcribed spacer 1 partial sequence 5.8S ribosomal RNA gene complete sequence and internal transcribed spacer 2 partial sequence_{aga}	KY817972.1 Aquilaria crassna voucher ML-8 small subunit ribosomal RNA gene partial sequence internal transcribed spacer 1 5.8S ribosomal RNA gene and internal transcribed spacer 2 complete sequence and large subunit ribosomal RNA gene partial sequence	0.0421308	0.0101917
KT364477.1 Aquilaria beccariana voucher SFN29381 internal transcribed spacer 1 partial sequence 5.8S ribosomal RNA gene complete sequence and internal transcribed spacer 2 partial sequence_{aga}	KY817972.1 Aquilaria crassna voucher ML-8 small subunit ribosomal RNA gene partial sequence internal transcribed spacer 1 5.8S ribosomal RNA gene and internal transcribed spacer 2 complete sequence and large subunit ribosomal RNA gene partial sequence	0.0221534	0.00722737
KX351419.1 Aquilaria beccariana voucher S1 5.8S ribosomal RNA gene partial sequence internal transcribed spacer 2 complete sequence and large subunit ribosomal RNA gene partial sequence_{aga}	KY817972.1 Aquilaria crassna voucher ML-8 small subunit ribosomal RNA gene partial sequence internal transcribed spacer 1 5.8S ribosomal RNA gene and internal transcribed spacer 2 complete sequence and large subunit ribosomal RNA gene partial sequence	0	0
KX424704.1 Aquilaria beccariana 5.8S ribosomal RNA gene partial sequence internal transcribed spacer 2 complete sequence and 28S ribosomal RNA gene partial sequence_{aga}	KY817972.1 Aquilaria crassna voucher ML-8 small subunit ribosomal RNA gene partial sequence internal transcribed spacer 1 5.8S ribosomal RNA gene and internal transcribed spacer 2 complete sequence and large subunit ribosomal RNA gene partial sequence	0.0438711	0.011062
KU238038.1 Aquilaria crassna voucher FBL G11 WC3 internal transcribed spacer 2 partial sequence	KY817972.1 Aquilaria crassna voucher ML-8 small subunit ribosomal RNA gene partial sequence internal transcribed spacer 1 5.8S ribosomal RNA gene and internal transcribed spacer 2 complete sequence and large subunit ribosomal RNA gene partial sequence	0	0
MH134139.1 Aquilaria crassna internal transcribed spacer 1 partial sequence 5.8S ribosomal RNA gene complete sequence and internal transcribed spacer 2 partial sequence	KY817972.1 Aquilaria crassna voucher ML-8 small subunit ribosomal RNA gene partial sequence internal transcribed spacer 1 5.8S ribosomal RNA gene and internal transcribed spacer 2 complete sequence and large subunit ribosomal RNA gene partial sequence	0	0
KU244111.1 Aquilaria crassna voucher FBL01017 internal transcribed spacer 2 partial sequence	KY817972.1 Aquilaria crassna voucher ML-8 small subunit ribosomal RNA gene partial sequence internal transcribed spacer 1 5.8S ribosomal RNA gene and internal transcribed spacer 2 complete sequence and large subunit ribosomal RNA gene partial sequence	0	0
KU244110.1 Aquilaria crassna voucher FBL01014 internal transcribed spacer 2 partial sequence	KY817972.1 Aquilaria crassna voucher ML-8 small subunit ribosomal RNA gene partial sequence internal transcribed spacer 1 5.8S ribosomal RNA gene and internal transcribed spacer 2 complete sequence and large subunit ribosomal RNA gene partial sequence	0	0
KU244109.1 Aquilaria crassna voucher FBL01013 internal transcribed spacer 2 partial sequence	KY817972.1 Aquilaria crassna voucher ML-8 small subunit ribosomal RNA gene partial sequence internal transcribed spacer 1 5.8S ribosomal RNA gene and internal transcribed spacer 2 complete sequence and large subunit ribosomal RNA gene partial sequence	0	0
KU244108.1 Aquilaria crassna voucher FBL01012 internal transcribed spacer 2 partial sequence	KY817972.1 Aquilaria crassna voucher ML-8 small subunit ribosomal RNA gene partial sequence internal transcribed spacer 1 5.8S ribosomal RNA gene and internal transcribed spacer 2 complete sequence and large subunit ribosomal RNA gene partial sequence	0	0
KU238037.1 Aquilaria crassna voucher FBL G10 WC2 internal transcribed spacer 2 partial sequence	KY817972.1 Aquilaria crassna voucher ML-8 small subunit ribosomal RNA gene partial sequence internal transcribed spacer 1 5.8S ribosomal RNA gene and internal transcribed spacer 2 complete sequence and large subunit ribosomal RNA gene partial sequence	0.0027248	0.00273681
KU238035.1 Aquilaria crassna voucher FBL G04 WC1 internal transcribed spacer 2 partial sequence	KY817972.1 Aquilaria crassna voucher ML-8 small subunit ribosomal RNA gene partial sequence internal transcribed spacer 1 5.8S ribosomal RNA gene and internal transcribed spacer 2 complete sequence and large subunit ribosomal RNA gene partial sequence	0.0027248	0.00273681
KU244085.1 Aquilaria crassna voucher FBL01017 internal transcribed spacer 1 partial sequence 5.8S ribosomal RNA gene complete sequence and internal transcribed spacer 2 partial sequence	KY817972.1 Aquilaria crassna voucher ML-8 small subunit ribosomal RNA gene partial sequence internal transcribed spacer 1 5.8S ribosomal RNA gene and internal transcribed spacer 2 complete sequence and large subunit ribosomal RNA gene partial sequence	0	0
KU244084.1 Aquilaria crassna voucher FBL01014 internal transcribed spacer 1 partial sequence 5.8S ribosomal RNA gene complete sequence and internal transcribed spacer 2 partial sequence	KY817972.1 Aquilaria crassna voucher ML-8 small subunit ribosomal RNA gene partial sequence internal transcribed spacer 1 5.8S ribosomal RNA gene and internal transcribed spacer 2 complete sequence and large subunit ribosomal RNA gene partial sequence	0	0
KU244083.1 Aquilaria crassna voucher FBL01013 internal transcribed spacer 1 partial sequence 5.8S ribosomal RNA gene complete sequence and internal transcribed spacer 2 partial sequence_{cra}	KY817972.1 Aquilaria crassna voucher ML-8 small subunit ribosomal RNA gene partial sequence internal transcribed spacer 1 5.8S ribosomal RNA gene and internal transcribed spacer 2 complete sequence and large subunit ribosomal RNA gene partial sequence	0	0
KU244082.1 Aquilaria crassna voucher FBL01012 internal transcribed spacer 1 partial sequence 5.8S ribosomal RNA gene complete sequence and internal transcribed spacer 2 partial sequence	KY817972.1 Aquilaria crassna voucher ML-8 small subunit ribosomal RNA gene partial sequence internal transcribed spacer 1 5.8S ribosomal RNA gene and internal transcribed spacer 2 complete sequence and large subunit ribosomal RNA gene partial sequence	0	0
KT364478.1 Aquilaria crassna voucher FBL01012 internal transcribed spacer 1 partial sequence 5.8S ribosomal RNA gene complete sequence and internal transcribed spacer 2 partial sequence	KY817972.1 Aquilaria crassna voucher ML-8 small subunit ribosomal RNA gene partial sequence internal transcribed spacer 1 5.8S ribosomal RNA gene and internal transcribed spacer 2 complete sequence and large subunit ribosomal RNA gene partial sequence	0	0
KY817982.1 Aquilaria crassna voucher S-9 small subunit ribosomal RNA gene partial sequence internal transcribed spacer 1 5.8S ribosomal RNA gene and internal transcribed spacer 2 complete sequence and large subunit ribosomal RNA gene partial sequence	KY817972.1 Aquilaria crassna voucher ML-8 small subunit ribosomal RNA gene partial sequence internal transcribed spacer 1 5.8S ribosomal RNA gene and internal transcribed spacer 2 complete sequence and large subunit ribosomal RNA gene partial sequence	0	0
KY817979.1 Aquilaria crassna voucher S-1 small subunit ribosomal RNA gene partial sequence internal transcribed spacer 1 5.8S ribosomal RNA gene and internal transcribed spacer 2 complete sequence and large subunit ribosomal RNA gene partial sequence	KY817972.1 Aquilaria crassna voucher ML-8 small subunit ribosomal RNA gene partial sequence internal transcribed spacer 1 5.8S ribosomal RNA gene and internal transcribed spacer 2 complete sequence and large subunit ribosomal RNA gene partial sequence	0	0
KY817973.1 Aquilaria crassna voucher ML-9 small subunit ribosomal RNA gene partial sequence internal transcribed spacer 1 5.8S ribosomal RNA gene and internal transcribed spacer 2 complete sequence and large subunit ribosomal RNA gene partial sequence	KY817972.1 Aquilaria crassna voucher ML-8 small subunit ribosomal RNA gene partial sequence internal transcribed spacer 1 5.8S ribosomal RNA gene and internal transcribed spacer 2 complete sequence and large subunit ribosomal RNA gene partial sequence	0	0
MH134137.1 Aquilaria agallochum internal transcribed spacer 1 partial sequence 5.8S ribosomal RNA gene complete sequence and internal transcribed spacer 2 partial sequence_{aga}	KY817971.1 Aquilaria crassna voucher ML-7 small subunit ribosomal RNA gene partial sequence internal transcribed spacer 1 5.8S ribosomal RNA gene and internal transcribed spacer 2 complete sequence and large subunit ribosomal RNA gene partial sequence	0.0165072	0.0059524
KU879012.1 Aquilaria agallochum 18S ribosomal RNA gene partial sequence internal transcribed spacer 1 5.8S ribosomal RNA gene and internal transcribed spacer 2 complete sequence and 28S ribosomal RNA gene partial sequence_{aga}	KY817971.1 Aquilaria crassna voucher ML-7 small subunit ribosomal RNA gene partial sequence internal transcribed spacer 1 5.8S ribosomal RNA gene and internal transcribed spacer 2 complete sequence and large subunit ribosomal RNA gene partial sequence	0.0221253	0.00719082
MH134138.1 Aquilaria beccariana internal transcribed spacer 1 partial sequence 5.8S ribosomal RNA gene complete sequence and internal transcribed spacer 2 partial sequence_{aga}	KY817971.1 Aquilaria crassna voucher ML-7 small subunit ribosomal RNA gene partial sequence internal transcribed spacer 1 5.8S ribosomal RNA gene and internal transcribed spacer 2 complete sequence and large subunit ribosomal RNA gene partial sequence	0.0220708	0.00727399
KT779116.1 Aquilaria beccariana voucher FBL04001 internal transcribed spacer 1 partial sequence 5.8S ribosomal RNA gene complete sequence and internal transcribed spacer 2 partial sequence_{aga}	KY817971.1 Aquilaria crassna voucher ML-7 small subunit ribosomal RNA gene partial sequence internal transcribed spacer 1 5.8S ribosomal RNA gene and internal transcribed spacer 2 complete sequence and large subunit ribosomal RNA gene partial sequence	0.0421308	0.0101917
KT364477.1 Aquilaria beccariana voucher SFN29381 internal transcribed spacer 1 partial sequence 5.8S ribosomal RNA gene complete sequence and internal transcribed spacer 2 partial sequence_{aga}	KY817971.1 Aquilaria crassna voucher ML-7 small subunit ribosomal RNA gene partial sequence internal transcribed spacer 1 5.8S ribosomal RNA gene and internal transcribed spacer 2 complete sequence and large subunit ribosomal RNA gene partial sequence	0.0221534	0.00722737
KX351419.1 Aquilaria beccariana voucher S1 5.8S ribosomal RNA gene partial sequence internal transcribed spacer 2 complete sequence and large subunit ribosomal RNA gene partial sequence_{aga}	KY817971.1 Aquilaria crassna voucher ML-7 small subunit ribosomal RNA gene partial sequence internal transcribed spacer 1 5.8S ribosomal RNA gene and internal transcribed spacer 2 complete sequence and large subunit ribosomal RNA gene partial sequence	0	0
KX424704.1 Aquilaria beccariana 5.8S ribosomal RNA gene partial sequence internal transcribed spacer 2 complete sequence and 28S ribosomal RNA gene partial sequence_{aga}	KY817971.1 Aquilaria crassna voucher ML-7 small subunit ribosomal RNA gene partial sequence internal transcribed spacer 1 5.8S ribosomal RNA gene and internal transcribed spacer 2 complete sequence and large subunit ribosomal RNA gene partial sequence	0.0438711	0.011062
KU238038.1 Aquilaria crassna voucher FBL G11 WC3 internal transcribed spacer 2 partial sequence	KY817971.1 Aquilaria crassna voucher ML-7 small subunit ribosomal RNA gene partial sequence internal transcribed spacer 1 5.8S ribosomal RNA gene and internal transcribed spacer 2 complete sequence and large subunit ribosomal RNA gene partial sequence	0	0
MH134139.1 Aquilaria crassna internal transcribed spacer 1 partial sequence 5.8S ribosomal RNA gene complete sequence and internal transcribed spacer 2 partial sequence	KY817971.1 Aquilaria crassna voucher ML-7 small subunit ribosomal RNA gene partial sequence internal transcribed spacer 1 5.8S ribosomal RNA gene and internal transcribed spacer 2 complete sequence and large subunit ribosomal RNA gene partial sequence	0	0
KU244111.1 Aquilaria crassna voucher FBL01017 internal transcribed spacer 2 partial sequence	KY817971.1 Aquilaria crassna voucher ML-7 small subunit ribosomal RNA gene partial sequence internal transcribed spacer 1 5.8S ribosomal RNA gene and internal transcribed spacer 2 complete sequence and large subunit ribosomal RNA gene partial sequence	0	0
KU244110.1 Aquilaria crassna voucher FBL01014 internal transcribed spacer 2 partial sequence	KY817971.1 Aquilaria crassna voucher ML-7 small subunit ribosomal RNA gene partial sequence internal transcribed spacer 1 5.8S ribosomal RNA gene and internal transcribed spacer 2 complete sequence and large subunit ribosomal RNA gene partial sequence	0	0
KU244109.1 Aquilaria crassna voucher FBL01013 internal transcribed spacer 2 partial sequence	KY817971.1 Aquilaria crassna voucher ML-7 small subunit ribosomal RNA gene partial sequence internal transcribed spacer 1 5.8S ribosomal RNA gene and internal transcribed spacer 2 complete sequence and large subunit ribosomal RNA gene partial sequence	0	0
KU244108.1 Aquilaria crassna voucher FBL01012 internal transcribed spacer 2 partial sequence	KY817971.1 Aquilaria crassna voucher ML-7 small subunit ribosomal RNA gene partial sequence internal transcribed spacer 1 5.8S ribosomal RNA gene and internal transcribed spacer 2 complete sequence and large subunit ribosomal RNA gene partial sequence	0	0
KU238037.1 Aquilaria crassna voucher FBL G10 WC2 internal transcribed spacer 2 partial sequence	KY817971.1 Aquilaria crassna voucher ML-7 small subunit ribosomal RNA gene partial sequence internal transcribed spacer 1 5.8S ribosomal RNA gene and internal transcribed spacer 2 complete sequence and large subunit ribosomal RNA gene partial sequence	0.0027248	0.00273681
KU238035.1 Aquilaria crassna voucher FBL G04 WC1 internal transcribed spacer 2 partial sequence	KY817971.1 Aquilaria crassna voucher ML-7 small subunit ribosomal RNA gene partial sequence internal transcribed spacer 1 5.8S ribosomal RNA gene and internal transcribed spacer 2 complete sequence and large subunit ribosomal RNA gene partial sequence	0.0027248	0.00273681
KU244085.1 Aquilaria crassna voucher FBL01017 internal transcribed spacer 1 partial sequence 5.8S ribosomal RNA gene complete sequence and internal transcribed spacer 2 partial sequence	KY817971.1 Aquilaria crassna voucher ML-7 small subunit ribosomal RNA gene partial sequence internal transcribed spacer 1 5.8S ribosomal RNA gene and internal transcribed spacer 2 complete sequence and large subunit ribosomal RNA gene partial sequence	0	0
KU244084.1 Aquilaria crassna voucher FBL01014 internal transcribed spacer 1 partial sequence 5.8S ribosomal RNA gene complete sequence and internal transcribed spacer 2 partial sequence	KY817971.1 Aquilaria crassna voucher ML-7 small subunit ribosomal RNA gene partial sequence internal transcribed spacer 1 5.8S ribosomal RNA gene and internal transcribed spacer 2 complete sequence and large subunit ribosomal RNA gene partial sequence	0	0
KU244083.1 Aquilaria crassna voucher FBL01013 internal transcribed spacer 1 partial sequence 5.8S ribosomal RNA gene complete sequence and internal transcribed spacer 2 partial sequence_{cra}	KY817971.1 Aquilaria crassna voucher ML-7 small subunit ribosomal RNA gene partial sequence internal transcribed spacer 1 5.8S ribosomal RNA gene and internal transcribed spacer 2 complete sequence and large subunit ribosomal RNA gene partial sequence	0	0
KU244082.1 Aquilaria crassna voucher FBL01012 internal transcribed spacer 1 partial sequence 5.8S ribosomal RNA gene complete sequence and internal transcribed spacer 2 partial sequence	KY817971.1 Aquilaria crassna voucher ML-7 small subunit ribosomal RNA gene partial sequence internal transcribed spacer 1 5.8S ribosomal RNA gene and internal transcribed spacer 2 complete sequence and large subunit ribosomal RNA gene partial sequence	0	0
KT364478.1 Aquilaria crassna voucher FBL01012 internal transcribed spacer 1 partial sequence 5.8S ribosomal RNA gene complete sequence and internal transcribed spacer 2 partial sequence	KY817971.1 Aquilaria crassna voucher ML-7 small subunit ribosomal RNA gene partial sequence internal transcribed spacer 1 5.8S ribosomal RNA gene and internal transcribed spacer 2 complete sequence and large subunit ribosomal RNA gene partial sequence	0	0
KY817982.1 Aquilaria crassna voucher S-9 small subunit ribosomal RNA gene partial sequence internal transcribed spacer 1 5.8S ribosomal RNA gene and internal transcribed spacer 2 complete sequence and large subunit ribosomal RNA gene partial sequence	KY817971.1 Aquilaria crassna voucher ML-7 small subunit ribosomal RNA gene partial sequence internal transcribed spacer 1 5.8S ribosomal RNA gene and internal transcribed spacer 2 complete sequence and large subunit ribosomal RNA gene partial sequence	0	0
KY817979.1 Aquilaria crassna voucher S-1 small subunit ribosomal RNA gene partial sequence internal transcribed spacer 1 5.8S ribosomal RNA gene and internal transcribed spacer 2 complete sequence and large subunit ribosomal RNA gene partial sequence	KY817971.1 Aquilaria crassna voucher ML-7 small subunit ribosomal RNA gene partial sequence internal transcribed spacer 1 5.8S ribosomal RNA gene and internal transcribed spacer 2 complete sequence and large subunit ribosomal RNA gene partial sequence	0	0
KY817973.1 Aquilaria crassna voucher ML-9 small subunit ribosomal RNA gene partial sequence internal transcribed spacer 1 5.8S ribosomal RNA gene and internal transcribed spacer 2 complete sequence and large subunit ribosomal RNA gene partial sequence	KY817971.1 Aquilaria crassna voucher ML-7 small subunit ribosomal RNA gene partial sequence internal transcribed spacer 1 5.8S ribosomal RNA gene and internal transcribed spacer 2 complete sequence and large subunit ribosomal RNA gene partial sequence	0	0
KY817972.1 Aquilaria crassna voucher ML-8 small subunit ribosomal RNA gene partial sequence internal transcribed spacer 1 5.8S ribosomal RNA gene and internal transcribed spacer 2 complete sequence and large subunit ribosomal RNA gene partial sequence	KY817971.1 Aquilaria crassna voucher ML-7 small subunit ribosomal RNA gene partial sequence internal transcribed spacer 1 5.8S ribosomal RNA gene and internal transcribed spacer 2 complete sequence and large subunit ribosomal RNA gene partial sequence	0	0
MH134137.1 Aquilaria agallochum internal transcribed spacer 1 partial sequence 5.8S ribosomal RNA gene complete sequence and internal transcribed spacer 2 partial sequence_{aga}	KY817970.1 Aquilaria crassna voucher ML-6 small subunit ribosomal RNA gene partial sequence internal transcribed spacer 1 5.8S ribosomal RNA gene and internal transcribed spacer 2 complete sequence and large subunit ribosomal RNA gene partial sequence	0.0165072	0.0059524
KU879012.1 Aquilaria agallochum 18S ribosomal RNA gene partial sequence internal transcribed spacer 1 5.8S ribosomal RNA gene and internal transcribed spacer 2 complete sequence and 28S ribosomal RNA gene partial sequence_{aga}	KY817970.1 Aquilaria crassna voucher ML-6 small subunit ribosomal RNA gene partial sequence internal transcribed spacer 1 5.8S ribosomal RNA gene and internal transcribed spacer 2 complete sequence and large subunit ribosomal RNA gene partial sequence	0.0221253	0.00719082
MH134138.1 Aquilaria beccariana internal transcribed spacer 1 partial sequence 5.8S ribosomal RNA gene complete sequence and internal transcribed spacer 2 partial sequence_{aga}	KY817970.1 Aquilaria crassna voucher ML-6 small subunit ribosomal RNA gene partial sequence internal transcribed spacer 1 5.8S ribosomal RNA gene and internal transcribed spacer 2 complete sequence and large subunit ribosomal RNA gene partial sequence	0.0220708	0.00727399
KT779116.1 Aquilaria beccariana voucher FBL04001 internal transcribed spacer 1 partial sequence 5.8S ribosomal RNA gene complete sequence and internal transcribed spacer 2 partial sequence_{aga}	KY817970.1 Aquilaria crassna voucher ML-6 small subunit ribosomal RNA gene partial sequence internal transcribed spacer 1 5.8S ribosomal RNA gene and internal transcribed spacer 2 complete sequence and large subunit ribosomal RNA gene partial sequence	0.0421308	0.0101917
KT364477.1 Aquilaria beccariana voucher SFN29381 internal transcribed spacer 1 partial sequence 5.8S ribosomal RNA gene complete sequence and internal transcribed spacer 2 partial sequence_{aga}	KY817970.1 Aquilaria crassna voucher ML-6 small subunit ribosomal RNA gene partial sequence internal transcribed spacer 1 5.8S ribosomal RNA gene and internal transcribed spacer 2 complete sequence and large subunit ribosomal RNA gene partial sequence	0.0221534	0.00722737
KX351419.1 Aquilaria beccariana voucher S1 5.8S ribosomal RNA gene partial sequence internal transcribed spacer 2 complete sequence and large subunit ribosomal RNA gene partial sequence_{aga}	KY817970.1 Aquilaria crassna voucher ML-6 small subunit ribosomal RNA gene partial sequence internal transcribed spacer 1 5.8S ribosomal RNA gene and internal transcribed spacer 2 complete sequence and large subunit ribosomal RNA gene partial sequence	0	0
KX424704.1 Aquilaria beccariana 5.8S ribosomal RNA gene partial sequence internal transcribed spacer 2 complete sequence and 28S ribosomal RNA gene partial sequence_{aga}	KY817970.1 Aquilaria crassna voucher ML-6 small subunit ribosomal RNA gene partial sequence internal transcribed spacer 1 5.8S ribosomal RNA gene and internal transcribed spacer 2 complete sequence and large subunit ribosomal RNA gene partial sequence	0.0438711	0.011062
KU238038.1 Aquilaria crassna voucher FBL G11 WC3 internal transcribed spacer 2 partial sequence	KY817970.1 Aquilaria crassna voucher ML-6 small subunit ribosomal RNA gene partial sequence internal transcribed spacer 1 5.8S ribosomal RNA gene and internal transcribed spacer 2 complete sequence and large subunit ribosomal RNA gene partial sequence	0	0
MH134139.1 Aquilaria crassna internal transcribed spacer 1 partial sequence 5.8S ribosomal RNA gene complete sequence and internal transcribed spacer 2 partial sequence	KY817970.1 Aquilaria crassna voucher ML-6 small subunit ribosomal RNA gene partial sequence internal transcribed spacer 1 5.8S ribosomal RNA gene and internal transcribed spacer 2 complete sequence and large subunit ribosomal RNA gene partial sequence	0	0
KU244111.1 Aquilaria crassna voucher FBL01017 internal transcribed spacer 2 partial sequence	KY817970.1 Aquilaria crassna voucher ML-6 small subunit ribosomal RNA gene partial sequence internal transcribed spacer 1 5.8S ribosomal RNA gene and internal transcribed spacer 2 complete sequence and large subunit ribosomal RNA gene partial sequence	0	0
KU244110.1 Aquilaria crassna voucher FBL01014 internal transcribed spacer 2 partial sequence	KY817970.1 Aquilaria crassna voucher ML-6 small subunit ribosomal RNA gene partial sequence internal transcribed spacer 1 5.8S ribosomal RNA gene and internal transcribed spacer 2 complete sequence and large subunit ribosomal RNA gene partial sequence	0	0
KU244109.1 Aquilaria crassna voucher FBL01013 internal transcribed spacer 2 partial sequence	KY817970.1 Aquilaria crassna voucher ML-6 small subunit ribosomal RNA gene partial sequence internal transcribed spacer 1 5.8S ribosomal RNA gene and internal transcribed spacer 2 complete sequence and large subunit ribosomal RNA gene partial sequence	0	0
KU244108.1 Aquilaria crassna voucher FBL01012 internal transcribed spacer 2 partial sequence	KY817970.1 Aquilaria crassna voucher ML-6 small subunit ribosomal RNA gene partial sequence internal transcribed spacer 1 5.8S ribosomal RNA gene and internal transcribed spacer 2 complete sequence and large subunit ribosomal RNA gene partial sequence	0	0
KU238037.1 Aquilaria crassna voucher FBL G10 WC2 internal transcribed spacer 2 partial sequence	KY817970.1 Aquilaria crassna voucher ML-6 small subunit ribosomal RNA gene partial sequence internal transcribed spacer 1 5.8S ribosomal RNA gene and internal transcribed spacer 2 complete sequence and large subunit ribosomal RNA gene partial sequence	0.0027248	0.00273681
KU238035.1 Aquilaria crassna voucher FBL G04 WC1 internal transcribed spacer 2 partial sequence	KY817970.1 Aquilaria crassna voucher ML-6 small subunit ribosomal RNA gene partial sequence internal transcribed spacer 1 5.8S ribosomal RNA gene and internal transcribed spacer 2 complete sequence and large subunit ribosomal RNA gene partial sequence	0.0027248	0.00273681
KU244085.1 Aquilaria crassna voucher FBL01017 internal transcribed spacer 1 partial sequence 5.8S ribosomal RNA gene complete sequence and internal transcribed spacer 2 partial sequence	KY817970.1 Aquilaria crassna voucher ML-6 small subunit ribosomal RNA gene partial sequence internal transcribed spacer 1 5.8S ribosomal RNA gene and internal transcribed spacer 2 complete sequence and large subunit ribosomal RNA gene partial sequence	0	0
KU244084.1 Aquilaria crassna voucher FBL01014 internal transcribed spacer 1 partial sequence 5.8S ribosomal RNA gene complete sequence and internal transcribed spacer 2 partial sequence	KY817970.1 Aquilaria crassna voucher ML-6 small subunit ribosomal RNA gene partial sequence internal transcribed spacer 1 5.8S ribosomal RNA gene and internal transcribed spacer 2 complete sequence and large subunit ribosomal RNA gene partial sequence	0	0
KU244083.1 Aquilaria crassna voucher FBL01013 internal transcribed spacer 1 partial sequence 5.8S ribosomal RNA gene complete sequence and internal transcribed spacer 2 partial sequence_{cra}	KY817970.1 Aquilaria crassna voucher ML-6 small subunit ribosomal RNA gene partial sequence internal transcribed spacer 1 5.8S ribosomal RNA gene and internal transcribed spacer 2 complete sequence and large subunit ribosomal RNA gene partial sequence	0	0
KU244082.1 Aquilaria crassna voucher FBL01012 internal transcribed spacer 1 partial sequence 5.8S ribosomal RNA gene complete sequence and internal transcribed spacer 2 partial sequence	KY817970.1 Aquilaria crassna voucher ML-6 small subunit ribosomal RNA gene partial sequence internal transcribed spacer 1 5.8S ribosomal RNA gene and internal transcribed spacer 2 complete sequence and large subunit ribosomal RNA gene partial sequence	0	0
KT364478.1 Aquilaria crassna voucher FBL01012 internal transcribed spacer 1 partial sequence 5.8S ribosomal RNA gene complete sequence and internal transcribed spacer 2 partial sequence	KY817970.1 Aquilaria crassna voucher ML-6 small subunit ribosomal RNA gene partial sequence internal transcribed spacer 1 5.8S ribosomal RNA gene and internal transcribed spacer 2 complete sequence and large subunit ribosomal RNA gene partial sequence	0	0
KY817982.1 Aquilaria crassna voucher S-9 small subunit ribosomal RNA gene partial sequence internal transcribed spacer 1 5.8S ribosomal RNA gene and internal transcribed spacer 2 complete sequence and large subunit ribosomal RNA gene partial sequence	KY817970.1 Aquilaria crassna voucher ML-6 small subunit ribosomal RNA gene partial sequence internal transcribed spacer 1 5.8S ribosomal RNA gene and internal transcribed spacer 2 complete sequence and large subunit ribosomal RNA gene partial sequence	0	0
KY817979.1 Aquilaria crassna voucher S-1 small subunit ribosomal RNA gene partial sequence internal transcribed spacer 1 5.8S ribosomal RNA gene and internal transcribed spacer 2 complete sequence and large subunit ribosomal RNA gene partial sequence	KY817970.1 Aquilaria crassna voucher ML-6 small subunit ribosomal RNA gene partial sequence internal transcribed spacer 1 5.8S ribosomal RNA gene and internal transcribed spacer 2 complete sequence and large subunit ribosomal RNA gene partial sequence	0	0
KY817973.1 Aquilaria crassna voucher ML-9 small subunit ribosomal RNA gene partial sequence internal transcribed spacer 1 5.8S ribosomal RNA gene and internal transcribed spacer 2 complete sequence and large subunit ribosomal RNA gene partial sequence	KY817970.1 Aquilaria crassna voucher ML-6 small subunit ribosomal RNA gene partial sequence internal transcribed spacer 1 5.8S ribosomal RNA gene and internal transcribed spacer 2 complete sequence and large subunit ribosomal RNA gene partial sequence	0	0
KY817972.1 Aquilaria crassna voucher ML-8 small subunit ribosomal RNA gene partial sequence internal transcribed spacer 1 5.8S ribosomal RNA gene and internal transcribed spacer 2 complete sequence and large subunit ribosomal RNA gene partial sequence	KY817970.1 Aquilaria crassna voucher ML-6 small subunit ribosomal RNA gene partial sequence internal transcribed spacer 1 5.8S ribosomal RNA gene and internal transcribed spacer 2 complete sequence and large subunit ribosomal RNA gene partial sequence	0	0
KY817971.1 Aquilaria crassna voucher ML-7 small subunit ribosomal RNA gene partial sequence internal transcribed spacer 1 5.8S ribosomal RNA gene and internal transcribed spacer 2 complete sequence and large subunit ribosomal RNA gene partial sequence	KY817970.1 Aquilaria crassna voucher ML-6 small subunit ribosomal RNA gene partial sequence internal transcribed spacer 1 5.8S ribosomal RNA gene and internal transcribed spacer 2 complete sequence and large subunit ribosomal RNA gene partial sequence	0	0
MH134137.1 Aquilaria agallochum internal transcribed spacer 1 partial sequence 5.8S ribosomal RNA gene complete sequence and internal transcribed spacer 2 partial sequence_{aga}	KY817969.1 Aquilaria crassna voucher ML-5 small subunit ribosomal RNA gene partial sequence internal transcribed spacer 1 5.8S ribosomal RNA gene and internal transcribed spacer 2 complete sequence and large subunit ribosomal RNA gene partial sequence	0.0165072	0.0059524
KU879012.1 Aquilaria agallochum 18S ribosomal RNA gene partial sequence internal transcribed spacer 1 5.8S ribosomal RNA gene and internal transcribed spacer 2 complete sequence and 28S ribosomal RNA gene partial sequence_{aga}	KY817969.1 Aquilaria crassna voucher ML-5 small subunit ribosomal RNA gene partial sequence internal transcribed spacer 1 5.8S ribosomal RNA gene and internal transcribed spacer 2 complete sequence and large subunit ribosomal RNA gene partial sequence	0.0221253	0.00719082
MH134138.1 Aquilaria beccariana internal transcribed spacer 1 partial sequence 5.8S ribosomal RNA gene complete sequence and internal transcribed spacer 2 partial sequence_{aga}	KY817969.1 Aquilaria crassna voucher ML-5 small subunit ribosomal RNA gene partial sequence internal transcribed spacer 1 5.8S ribosomal RNA gene and internal transcribed spacer 2 complete sequence and large subunit ribosomal RNA gene partial sequence	0.0220708	0.00727399
KT779116.1 Aquilaria beccariana voucher FBL04001 internal transcribed spacer 1 partial sequence 5.8S ribosomal RNA gene complete sequence and internal transcribed spacer 2 partial sequence_{aga}	KY817969.1 Aquilaria crassna voucher ML-5 small subunit ribosomal RNA gene partial sequence internal transcribed spacer 1 5.8S ribosomal RNA gene and internal transcribed spacer 2 complete sequence and large subunit ribosomal RNA gene partial sequence	0.0421308	0.0101917
KT364477.1 Aquilaria beccariana voucher SFN29381 internal transcribed spacer 1 partial sequence 5.8S ribosomal RNA gene complete sequence and internal transcribed spacer 2 partial sequence_{aga}	KY817969.1 Aquilaria crassna voucher ML-5 small subunit ribosomal RNA gene partial sequence internal transcribed spacer 1 5.8S ribosomal RNA gene and internal transcribed spacer 2 complete sequence and large subunit ribosomal RNA gene partial sequence	0.0221534	0.00722737
KX351419.1 Aquilaria beccariana voucher S1 5.8S ribosomal RNA gene partial sequence internal transcribed spacer 2 complete sequence and large subunit ribosomal RNA gene partial sequence_{aga}	KY817969.1 Aquilaria crassna voucher ML-5 small subunit ribosomal RNA gene partial sequence internal transcribed spacer 1 5.8S ribosomal RNA gene and internal transcribed spacer 2 complete sequence and large subunit ribosomal RNA gene partial sequence	0	0
KX424704.1 Aquilaria beccariana 5.8S ribosomal RNA gene partial sequence internal transcribed spacer 2 complete sequence and 28S ribosomal RNA gene partial sequence_{aga}	KY817969.1 Aquilaria crassna voucher ML-5 small subunit ribosomal RNA gene partial sequence internal transcribed spacer 1 5.8S ribosomal RNA gene and internal transcribed spacer 2 complete sequence and large subunit ribosomal RNA gene partial sequence	0.0438711	0.011062
KU238038.1 Aquilaria crassna voucher FBL G11 WC3 internal transcribed spacer 2 partial sequence	KY817969.1 Aquilaria crassna voucher ML-5 small subunit ribosomal RNA gene partial sequence internal transcribed spacer 1 5.8S ribosomal RNA gene and internal transcribed spacer 2 complete sequence and large subunit ribosomal RNA gene partial sequence	0	0
MH134139.1 Aquilaria crassna internal transcribed spacer 1 partial sequence 5.8S ribosomal RNA gene complete sequence and internal transcribed spacer 2 partial sequence	KY817969.1 Aquilaria crassna voucher ML-5 small subunit ribosomal RNA gene partial sequence internal transcribed spacer 1 5.8S ribosomal RNA gene and internal transcribed spacer 2 complete sequence and large subunit ribosomal RNA gene partial sequence	0	0
KU244111.1 Aquilaria crassna voucher FBL01017 internal transcribed spacer 2 partial sequence	KY817969.1 Aquilaria crassna voucher ML-5 small subunit ribosomal RNA gene partial sequence internal transcribed spacer 1 5.8S ribosomal RNA gene and internal transcribed spacer 2 complete sequence and large subunit ribosomal RNA gene partial sequence	0	0
KU244110.1 Aquilaria crassna voucher FBL01014 internal transcribed spacer 2 partial sequence	KY817969.1 Aquilaria crassna voucher ML-5 small subunit ribosomal RNA gene partial sequence internal transcribed spacer 1 5.8S ribosomal RNA gene and internal transcribed spacer 2 complete sequence and large subunit ribosomal RNA gene partial sequence	0	0
KU244109.1 Aquilaria crassna voucher FBL01013 internal transcribed spacer 2 partial sequence	KY817969.1 Aquilaria crassna voucher ML-5 small subunit ribosomal RNA gene partial sequence internal transcribed spacer 1 5.8S ribosomal RNA gene and internal transcribed spacer 2 complete sequence and large subunit ribosomal RNA gene partial sequence	0	0
KU244108.1 Aquilaria crassna voucher FBL01012 internal transcribed spacer 2 partial sequence	KY817969.1 Aquilaria crassna voucher ML-5 small subunit ribosomal RNA gene partial sequence internal transcribed spacer 1 5.8S ribosomal RNA gene and internal transcribed spacer 2 complete sequence and large subunit ribosomal RNA gene partial sequence	0	0
KU238037.1 Aquilaria crassna voucher FBL G10 WC2 internal transcribed spacer 2 partial sequence	KY817969.1 Aquilaria crassna voucher ML-5 small subunit ribosomal RNA gene partial sequence internal transcribed spacer 1 5.8S ribosomal RNA gene and internal transcribed spacer 2 complete sequence and large subunit ribosomal RNA gene partial sequence	0.0027248	0.00273681
KU238035.1 Aquilaria crassna voucher FBL G04 WC1 internal transcribed spacer 2 partial sequence	KY817969.1 Aquilaria crassna voucher ML-5 small subunit ribosomal RNA gene partial sequence internal transcribed spacer 1 5.8S ribosomal RNA gene and internal transcribed spacer 2 complete sequence and large subunit ribosomal RNA gene partial sequence	0.0027248	0.00273681
KU244085.1 Aquilaria crassna voucher FBL01017 internal transcribed spacer 1 partial sequence 5.8S ribosomal RNA gene complete sequence and internal transcribed spacer 2 partial sequence	KY817969.1 Aquilaria crassna voucher ML-5 small subunit ribosomal RNA gene partial sequence internal transcribed spacer 1 5.8S ribosomal RNA gene and internal transcribed spacer 2 complete sequence and large subunit ribosomal RNA gene partial sequence	0	0
KU244084.1 Aquilaria crassna voucher FBL01014 internal transcribed spacer 1 partial sequence 5.8S ribosomal RNA gene complete sequence and internal transcribed spacer 2 partial sequence	KY817969.1 Aquilaria crassna voucher ML-5 small subunit ribosomal RNA gene partial sequence internal transcribed spacer 1 5.8S ribosomal RNA gene and internal transcribed spacer 2 complete sequence and large subunit ribosomal RNA gene partial sequence	0	0
KU244083.1 Aquilaria crassna voucher FBL01013 internal transcribed spacer 1 partial sequence 5.8S ribosomal RNA gene complete sequence and internal transcribed spacer 2 partial sequence_{cra}	KY817969.1 Aquilaria crassna voucher ML-5 small subunit ribosomal RNA gene partial sequence internal transcribed spacer 1 5.8S ribosomal RNA gene and internal transcribed spacer 2 complete sequence and large subunit ribosomal RNA gene partial sequence	0	0
KU244082.1 Aquilaria crassna voucher FBL01012 internal transcribed spacer 1 partial sequence 5.8S ribosomal RNA gene complete sequence and internal transcribed spacer 2 partial sequence	KY817969.1 Aquilaria crassna voucher ML-5 small subunit ribosomal RNA gene partial sequence internal transcribed spacer 1 5.8S ribosomal RNA gene and internal transcribed spacer 2 complete sequence and large subunit ribosomal RNA gene partial sequence	0	0
KT364478.1 Aquilaria crassna voucher FBL01012 internal transcribed spacer 1 partial sequence 5.8S ribosomal RNA gene complete sequence and internal transcribed spacer 2 partial sequence	KY817969.1 Aquilaria crassna voucher ML-5 small subunit ribosomal RNA gene partial sequence internal transcribed spacer 1 5.8S ribosomal RNA gene and internal transcribed spacer 2 complete sequence and large subunit ribosomal RNA gene partial sequence	0	0
KY817982.1 Aquilaria crassna voucher S-9 small subunit ribosomal RNA gene partial sequence internal transcribed spacer 1 5.8S ribosomal RNA gene and internal transcribed spacer 2 complete sequence and large subunit ribosomal RNA gene partial sequence	KY817969.1 Aquilaria crassna voucher ML-5 small subunit ribosomal RNA gene partial sequence internal transcribed spacer 1 5.8S ribosomal RNA gene and internal transcribed spacer 2 complete sequence and large subunit ribosomal RNA gene partial sequence	0	0
KY817979.1 Aquilaria crassna voucher S-1 small subunit ribosomal RNA gene partial sequence internal transcribed spacer 1 5.8S ribosomal RNA gene and internal transcribed spacer 2 complete sequence and large subunit ribosomal RNA gene partial sequence	KY817969.1 Aquilaria crassna voucher ML-5 small subunit ribosomal RNA gene partial sequence internal transcribed spacer 1 5.8S ribosomal RNA gene and internal transcribed spacer 2 complete sequence and large subunit ribosomal RNA gene partial sequence	0	0
KY817973.1 Aquilaria crassna voucher ML-9 small subunit ribosomal RNA gene partial sequence internal transcribed spacer 1 5.8S ribosomal RNA gene and internal transcribed spacer 2 complete sequence and large subunit ribosomal RNA gene partial sequence	KY817969.1 Aquilaria crassna voucher ML-5 small subunit ribosomal RNA gene partial sequence internal transcribed spacer 1 5.8S ribosomal RNA gene and internal transcribed spacer 2 complete sequence and large subunit ribosomal RNA gene partial sequence	0	0
KY817972.1 Aquilaria crassna voucher ML-8 small subunit ribosomal RNA gene partial sequence internal transcribed spacer 1 5.8S ribosomal RNA gene and internal transcribed spacer 2 complete sequence and large subunit ribosomal RNA gene partial sequence	KY817969.1 Aquilaria crassna voucher ML-5 small subunit ribosomal RNA gene partial sequence internal transcribed spacer 1 5.8S ribosomal RNA gene and internal transcribed spacer 2 complete sequence and large subunit ribosomal RNA gene partial sequence	0	0
KY817971.1 Aquilaria crassna voucher ML-7 small subunit ribosomal RNA gene partial sequence internal transcribed spacer 1 5.8S ribosomal RNA gene and internal transcribed spacer 2 complete sequence and large subunit ribosomal RNA gene partial sequence	KY817969.1 Aquilaria crassna voucher ML-5 small subunit ribosomal RNA gene partial sequence internal transcribed spacer 1 5.8S ribosomal RNA gene and internal transcribed spacer 2 complete sequence and large subunit ribosomal RNA gene partial sequence	0	0
KY817970.1 Aquilaria crassna voucher ML-6 small subunit ribosomal RNA gene partial sequence internal transcribed spacer 1 5.8S ribosomal RNA gene and internal transcribed spacer 2 complete sequence and large subunit ribosomal RNA gene partial sequence	KY817969.1 Aquilaria crassna voucher ML-5 small subunit ribosomal RNA gene partial sequence internal transcribed spacer 1 5.8S ribosomal RNA gene and internal transcribed spacer 2 complete sequence and large subunit ribosomal RNA gene partial sequence	0	0
MH134137.1 Aquilaria agallochum internal transcribed spacer 1 partial sequence 5.8S ribosomal RNA gene complete sequence and internal transcribed spacer 2 partial sequence_{aga}	KY817968.1 Aquilaria crassna voucher ML-4 small subunit ribosomal RNA gene partial sequence internal transcribed spacer 1 5.8S ribosomal RNA gene and internal transcribed spacer 2 complete sequence and large subunit ribosomal RNA gene partial sequence	0.0165072	0.0059524
KU879012.1 Aquilaria agallochum 18S ribosomal RNA gene partial sequence internal transcribed spacer 1 5.8S ribosomal RNA gene and internal transcribed spacer 2 complete sequence and 28S ribosomal RNA gene partial sequence_{aga}	KY817968.1 Aquilaria crassna voucher ML-4 small subunit ribosomal RNA gene partial sequence internal transcribed spacer 1 5.8S ribosomal RNA gene and internal transcribed spacer 2 complete sequence and large subunit ribosomal RNA gene partial sequence	0.0221253	0.00719082
MH134138.1 Aquilaria beccariana internal transcribed spacer 1 partial sequence 5.8S ribosomal RNA gene complete sequence and internal transcribed spacer 2 partial sequence_{aga}	KY817968.1 Aquilaria crassna voucher ML-4 small subunit ribosomal RNA gene partial sequence internal transcribed spacer 1 5.8S ribosomal RNA gene and internal transcribed spacer 2 complete sequence and large subunit ribosomal RNA gene partial sequence	0.0220708	0.00727399
KT779116.1 Aquilaria beccariana voucher FBL04001 internal transcribed spacer 1 partial sequence 5.8S ribosomal RNA gene complete sequence and internal transcribed spacer 2 partial sequence_{aga}	KY817968.1 Aquilaria crassna voucher ML-4 small subunit ribosomal RNA gene partial sequence internal transcribed spacer 1 5.8S ribosomal RNA gene and internal transcribed spacer 2 complete sequence and large subunit ribosomal RNA gene partial sequence	0.0421308	0.0101917
KT364477.1 Aquilaria beccariana voucher SFN29381 internal transcribed spacer 1 partial sequence 5.8S ribosomal RNA gene complete sequence and internal transcribed spacer 2 partial sequence_{aga}	KY817968.1 Aquilaria crassna voucher ML-4 small subunit ribosomal RNA gene partial sequence internal transcribed spacer 1 5.8S ribosomal RNA gene and internal transcribed spacer 2 complete sequence and large subunit ribosomal RNA gene partial sequence	0.0221534	0.00722737
KX351419.1 Aquilaria beccariana voucher S1 5.8S ribosomal RNA gene partial sequence internal transcribed spacer 2 complete sequence and large subunit ribosomal RNA gene partial sequence_{aga}	KY817968.1 Aquilaria crassna voucher ML-4 small subunit ribosomal RNA gene partial sequence internal transcribed spacer 1 5.8S ribosomal RNA gene and internal transcribed spacer 2 complete sequence and large subunit ribosomal RNA gene partial sequence	0	0
KX424704.1 Aquilaria beccariana 5.8S ribosomal RNA gene partial sequence internal transcribed spacer 2 complete sequence and 28S ribosomal RNA gene partial sequence_{aga}	KY817968.1 Aquilaria crassna voucher ML-4 small subunit ribosomal RNA gene partial sequence internal transcribed spacer 1 5.8S ribosomal RNA gene and internal transcribed spacer 2 complete sequence and large subunit ribosomal RNA gene partial sequence	0.0438711	0.011062
KU238038.1 Aquilaria crassna voucher FBL G11 WC3 internal transcribed spacer 2 partial sequence	KY817968.1 Aquilaria crassna voucher ML-4 small subunit ribosomal RNA gene partial sequence internal transcribed spacer 1 5.8S ribosomal RNA gene and internal transcribed spacer 2 complete sequence and large subunit ribosomal RNA gene partial sequence	0	0
MH134139.1 Aquilaria crassna internal transcribed spacer 1 partial sequence 5.8S ribosomal RNA gene complete sequence and internal transcribed spacer 2 partial sequence	KY817968.1 Aquilaria crassna voucher ML-4 small subunit ribosomal RNA gene partial sequence internal transcribed spacer 1 5.8S ribosomal RNA gene and internal transcribed spacer 2 complete sequence and large subunit ribosomal RNA gene partial sequence	0	0
KU244111.1 Aquilaria crassna voucher FBL01017 internal transcribed spacer 2 partial sequence	KY817968.1 Aquilaria crassna voucher ML-4 small subunit ribosomal RNA gene partial sequence internal transcribed spacer 1 5.8S ribosomal RNA gene and internal transcribed spacer 2 complete sequence and large subunit ribosomal RNA gene partial sequence	0	0
KU244110.1 Aquilaria crassna voucher FBL01014 internal transcribed spacer 2 partial sequence	KY817968.1 Aquilaria crassna voucher ML-4 small subunit ribosomal RNA gene partial sequence internal transcribed spacer 1 5.8S ribosomal RNA gene and internal transcribed spacer 2 complete sequence and large subunit ribosomal RNA gene partial sequence	0	0
KU244109.1 Aquilaria crassna voucher FBL01013 internal transcribed spacer 2 partial sequence	KY817968.1 Aquilaria crassna voucher ML-4 small subunit ribosomal RNA gene partial sequence internal transcribed spacer 1 5.8S ribosomal RNA gene and internal transcribed spacer 2 complete sequence and large subunit ribosomal RNA gene partial sequence	0	0
KU244108.1 Aquilaria crassna voucher FBL01012 internal transcribed spacer 2 partial sequence	KY817968.1 Aquilaria crassna voucher ML-4 small subunit ribosomal RNA gene partial sequence internal transcribed spacer 1 5.8S ribosomal RNA gene and internal transcribed spacer 2 complete sequence and large subunit ribosomal RNA gene partial sequence	0	0
KU238037.1 Aquilaria crassna voucher FBL G10 WC2 internal transcribed spacer 2 partial sequence	KY817968.1 Aquilaria crassna voucher ML-4 small subunit ribosomal RNA gene partial sequence internal transcribed spacer 1 5.8S ribosomal RNA gene and internal transcribed spacer 2 complete sequence and large subunit ribosomal RNA gene partial sequence	0.0027248	0.00273681
KU238035.1 Aquilaria crassna voucher FBL G04 WC1 internal transcribed spacer 2 partial sequence	KY817968.1 Aquilaria crassna voucher ML-4 small subunit ribosomal RNA gene partial sequence internal transcribed spacer 1 5.8S ribosomal RNA gene and internal transcribed spacer 2 complete sequence and large subunit ribosomal RNA gene partial sequence	0.0027248	0.00273681
KU244085.1 Aquilaria crassna voucher FBL01017 internal transcribed spacer 1 partial sequence 5.8S ribosomal RNA gene complete sequence and internal transcribed spacer 2 partial sequence	KY817968.1 Aquilaria crassna voucher ML-4 small subunit ribosomal RNA gene partial sequence internal transcribed spacer 1 5.8S ribosomal RNA gene and internal transcribed spacer 2 complete sequence and large subunit ribosomal RNA gene partial sequence	0	0
KU244084.1 Aquilaria crassna voucher FBL01014 internal transcribed spacer 1 partial sequence 5.8S ribosomal RNA gene complete sequence and internal transcribed spacer 2 partial sequence	KY817968.1 Aquilaria crassna voucher ML-4 small subunit ribosomal RNA gene partial sequence internal transcribed spacer 1 5.8S ribosomal RNA gene and internal transcribed spacer 2 complete sequence and large subunit ribosomal RNA gene partial sequence	0	0
KU244083.1 Aquilaria crassna voucher FBL01013 internal transcribed spacer 1 partial sequence 5.8S ribosomal RNA gene complete sequence and internal transcribed spacer 2 partial sequence_{cra}	KY817968.1 Aquilaria crassna voucher ML-4 small subunit ribosomal RNA gene partial sequence internal transcribed spacer 1 5.8S ribosomal RNA gene and internal transcribed spacer 2 complete sequence and large subunit ribosomal RNA gene partial sequence	0	0
KU244082.1 Aquilaria crassna voucher FBL01012 internal transcribed spacer 1 partial sequence 5.8S ribosomal RNA gene complete sequence and internal transcribed spacer 2 partial sequence	KY817968.1 Aquilaria crassna voucher ML-4 small subunit ribosomal RNA gene partial sequence internal transcribed spacer 1 5.8S ribosomal RNA gene and internal transcribed spacer 2 complete sequence and large subunit ribosomal RNA gene partial sequence	0	0
KT364478.1 Aquilaria crassna voucher FBL01012 internal transcribed spacer 1 partial sequence 5.8S ribosomal RNA gene complete sequence and internal transcribed spacer 2 partial sequence	KY817968.1 Aquilaria crassna voucher ML-4 small subunit ribosomal RNA gene partial sequence internal transcribed spacer 1 5.8S ribosomal RNA gene and internal transcribed spacer 2 complete sequence and large subunit ribosomal RNA gene partial sequence	0	0
KY817982.1 Aquilaria crassna voucher S-9 small subunit ribosomal RNA gene partial sequence internal transcribed spacer 1 5.8S ribosomal RNA gene and internal transcribed spacer 2 complete sequence and large subunit ribosomal RNA gene partial sequence	KY817968.1 Aquilaria crassna voucher ML-4 small subunit ribosomal RNA gene partial sequence internal transcribed spacer 1 5.8S ribosomal RNA gene and internal transcribed spacer 2 complete sequence and large subunit ribosomal RNA gene partial sequence	0	0
KY817979.1 Aquilaria crassna voucher S-1 small subunit ribosomal RNA gene partial sequence internal transcribed spacer 1 5.8S ribosomal RNA gene and internal transcribed spacer 2 complete sequence and large subunit ribosomal RNA gene partial sequence	KY817968.1 Aquilaria crassna voucher ML-4 small subunit ribosomal RNA gene partial sequence internal transcribed spacer 1 5.8S ribosomal RNA gene and internal transcribed spacer 2 complete sequence and large subunit ribosomal RNA gene partial sequence	0	0
KY817973.1 Aquilaria crassna voucher ML-9 small subunit ribosomal RNA gene partial sequence internal transcribed spacer 1 5.8S ribosomal RNA gene and internal transcribed spacer 2 complete sequence and large subunit ribosomal RNA gene partial sequence	KY817968.1 Aquilaria crassna voucher ML-4 small subunit ribosomal RNA gene partial sequence internal transcribed spacer 1 5.8S ribosomal RNA gene and internal transcribed spacer 2 complete sequence and large subunit ribosomal RNA gene partial sequence	0	0
KY817972.1 Aquilaria crassna voucher ML-8 small subunit ribosomal RNA gene partial sequence internal transcribed spacer 1 5.8S ribosomal RNA gene and internal transcribed spacer 2 complete sequence and large subunit ribosomal RNA gene partial sequence	KY817968.1 Aquilaria crassna voucher ML-4 small subunit ribosomal RNA gene partial sequence internal transcribed spacer 1 5.8S ribosomal RNA gene and internal transcribed spacer 2 complete sequence and large subunit ribosomal RNA gene partial sequence	0	0
KY817971.1 Aquilaria crassna voucher ML-7 small subunit ribosomal RNA gene partial sequence internal transcribed spacer 1 5.8S ribosomal RNA gene and internal transcribed spacer 2 complete sequence and large subunit ribosomal RNA gene partial sequence	KY817968.1 Aquilaria crassna voucher ML-4 small subunit ribosomal RNA gene partial sequence internal transcribed spacer 1 5.8S ribosomal RNA gene and internal transcribed spacer 2 complete sequence and large subunit ribosomal RNA gene partial sequence	0	0
KY817970.1 Aquilaria crassna voucher ML-6 small subunit ribosomal RNA gene partial sequence internal transcribed spacer 1 5.8S ribosomal RNA gene and internal transcribed spacer 2 complete sequence and large subunit ribosomal RNA gene partial sequence	KY817968.1 Aquilaria crassna voucher ML-4 small subunit ribosomal RNA gene partial sequence internal transcribed spacer 1 5.8S ribosomal RNA gene and internal transcribed spacer 2 complete sequence and large subunit ribosomal RNA gene partial sequence	0	0
KY817969.1 Aquilaria crassna voucher ML-5 small subunit ribosomal RNA gene partial sequence internal transcribed spacer 1 5.8S ribosomal RNA gene and internal transcribed spacer 2 complete sequence and large subunit ribosomal RNA gene partial sequence	KY817968.1 Aquilaria crassna voucher ML-4 small subunit ribosomal RNA gene partial sequence internal transcribed spacer 1 5.8S ribosomal RNA gene and internal transcribed spacer 2 complete sequence and large subunit ribosomal RNA gene partial sequence	0	0
MH134137.1 Aquilaria agallochum internal transcribed spacer 1 partial sequence 5.8S ribosomal RNA gene complete sequence and internal transcribed spacer 2 partial sequence_{aga}	KY817967.1 Aquilaria crassna voucher ML-3 small subunit ribosomal RNA gene partial sequence internal transcribed spacer 1 5.8S ribosomal RNA gene and internal transcribed spacer 2 complete sequence and large subunit ribosomal RNA gene partial sequence	0.0165072	0.0059524
KU879012.1 Aquilaria agallochum 18S ribosomal RNA gene partial sequence internal transcribed spacer 1 5.8S ribosomal RNA gene and internal transcribed spacer 2 complete sequence and 28S ribosomal RNA gene partial sequence_{aga}	KY817967.1 Aquilaria crassna voucher ML-3 small subunit ribosomal RNA gene partial sequence internal transcribed spacer 1 5.8S ribosomal RNA gene and internal transcribed spacer 2 complete sequence and large subunit ribosomal RNA gene partial sequence	0.0221253	0.00719082
MH134138.1 Aquilaria beccariana internal transcribed spacer 1 partial sequence 5.8S ribosomal RNA gene complete sequence and internal transcribed spacer 2 partial sequence_{aga}	KY817967.1 Aquilaria crassna voucher ML-3 small subunit ribosomal RNA gene partial sequence internal transcribed spacer 1 5.8S ribosomal RNA gene and internal transcribed spacer 2 complete sequence and large subunit ribosomal RNA gene partial sequence	0.0220708	0.00727399
KT779116.1 Aquilaria beccariana voucher FBL04001 internal transcribed spacer 1 partial sequence 5.8S ribosomal RNA gene complete sequence and internal transcribed spacer 2 partial sequence_{aga}	KY817967.1 Aquilaria crassna voucher ML-3 small subunit ribosomal RNA gene partial sequence internal transcribed spacer 1 5.8S ribosomal RNA gene and internal transcribed spacer 2 complete sequence and large subunit ribosomal RNA gene partial sequence	0.0421308	0.0101917
KT364477.1 Aquilaria beccariana voucher SFN29381 internal transcribed spacer 1 partial sequence 5.8S ribosomal RNA gene complete sequence and internal transcribed spacer 2 partial sequence_{aga}	KY817967.1 Aquilaria crassna voucher ML-3 small subunit ribosomal RNA gene partial sequence internal transcribed spacer 1 5.8S ribosomal RNA gene and internal transcribed spacer 2 complete sequence and large subunit ribosomal RNA gene partial sequence	0.0221534	0.00722737
KX351419.1 Aquilaria beccariana voucher S1 5.8S ribosomal RNA gene partial sequence internal transcribed spacer 2 complete sequence and large subunit ribosomal RNA gene partial sequence_{aga}	KY817967.1 Aquilaria crassna voucher ML-3 small subunit ribosomal RNA gene partial sequence internal transcribed spacer 1 5.8S ribosomal RNA gene and internal transcribed spacer 2 complete sequence and large subunit ribosomal RNA gene partial sequence	0	0
KX424704.1 Aquilaria beccariana 5.8S ribosomal RNA gene partial sequence internal transcribed spacer 2 complete sequence and 28S ribosomal RNA gene partial sequence_{aga}	KY817967.1 Aquilaria crassna voucher ML-3 small subunit ribosomal RNA gene partial sequence internal transcribed spacer 1 5.8S ribosomal RNA gene and internal transcribed spacer 2 complete sequence and large subunit ribosomal RNA gene partial sequence	0.0438711	0.011062
KU238038.1 Aquilaria crassna voucher FBL G11 WC3 internal transcribed spacer 2 partial sequence	KY817967.1 Aquilaria crassna voucher ML-3 small subunit ribosomal RNA gene partial sequence internal transcribed spacer 1 5.8S ribosomal RNA gene and internal transcribed spacer 2 complete sequence and large subunit ribosomal RNA gene partial sequence	0	0
MH134139.1 Aquilaria crassna internal transcribed spacer 1 partial sequence 5.8S ribosomal RNA gene complete sequence and internal transcribed spacer 2 partial sequence	KY817967.1 Aquilaria crassna voucher ML-3 small subunit ribosomal RNA gene partial sequence internal transcribed spacer 1 5.8S ribosomal RNA gene and internal transcribed spacer 2 complete sequence and large subunit ribosomal RNA gene partial sequence	0	0
KU244111.1 Aquilaria crassna voucher FBL01017 internal transcribed spacer 2 partial sequence	KY817967.1 Aquilaria crassna voucher ML-3 small subunit ribosomal RNA gene partial sequence internal transcribed spacer 1 5.8S ribosomal RNA gene and internal transcribed spacer 2 complete sequence and large subunit ribosomal RNA gene partial sequence	0	0
KU244110.1 Aquilaria crassna voucher FBL01014 internal transcribed spacer 2 partial sequence	KY817967.1 Aquilaria crassna voucher ML-3 small subunit ribosomal RNA gene partial sequence internal transcribed spacer 1 5.8S ribosomal RNA gene and internal transcribed spacer 2 complete sequence and large subunit ribosomal RNA gene partial sequence	0	0
KU244109.1 Aquilaria crassna voucher FBL01013 internal transcribed spacer 2 partial sequence	KY817967.1 Aquilaria crassna voucher ML-3 small subunit ribosomal RNA gene partial sequence internal transcribed spacer 1 5.8S ribosomal RNA gene and internal transcribed spacer 2 complete sequence and large subunit ribosomal RNA gene partial sequence	0	0
KU244108.1 Aquilaria crassna voucher FBL01012 internal transcribed spacer 2 partial sequence	KY817967.1 Aquilaria crassna voucher ML-3 small subunit ribosomal RNA gene partial sequence internal transcribed spacer 1 5.8S ribosomal RNA gene and internal transcribed spacer 2 complete sequence and large subunit ribosomal RNA gene partial sequence	0	0
KU238037.1 Aquilaria crassna voucher FBL G10 WC2 internal transcribed spacer 2 partial sequence	KY817967.1 Aquilaria crassna voucher ML-3 small subunit ribosomal RNA gene partial sequence internal transcribed spacer 1 5.8S ribosomal RNA gene and internal transcribed spacer 2 complete sequence and large subunit ribosomal RNA gene partial sequence	0.0027248	0.00273681
KU238035.1 Aquilaria crassna voucher FBL G04 WC1 internal transcribed spacer 2 partial sequence	KY817967.1 Aquilaria crassna voucher ML-3 small subunit ribosomal RNA gene partial sequence internal transcribed spacer 1 5.8S ribosomal RNA gene and internal transcribed spacer 2 complete sequence and large subunit ribosomal RNA gene partial sequence	0.0027248	0.00273681
KU244085.1 Aquilaria crassna voucher FBL01017 internal transcribed spacer 1 partial sequence 5.8S ribosomal RNA gene complete sequence and internal transcribed spacer 2 partial sequence	KY817967.1 Aquilaria crassna voucher ML-3 small subunit ribosomal RNA gene partial sequence internal transcribed spacer 1 5.8S ribosomal RNA gene and internal transcribed spacer 2 complete sequence and large subunit ribosomal RNA gene partial sequence	0	0
KU244084.1 Aquilaria crassna voucher FBL01014 internal transcribed spacer 1 partial sequence 5.8S ribosomal RNA gene complete sequence and internal transcribed spacer 2 partial sequence	KY817967.1 Aquilaria crassna voucher ML-3 small subunit ribosomal RNA gene partial sequence internal transcribed spacer 1 5.8S ribosomal RNA gene and internal transcribed spacer 2 complete sequence and large subunit ribosomal RNA gene partial sequence	0	0
KU244083.1 Aquilaria crassna voucher FBL01013 internal transcribed spacer 1 partial sequence 5.8S ribosomal RNA gene complete sequence and internal transcribed spacer 2 partial sequence_{cra}	KY817967.1 Aquilaria crassna voucher ML-3 small subunit ribosomal RNA gene partial sequence internal transcribed spacer 1 5.8S ribosomal RNA gene and internal transcribed spacer 2 complete sequence and large subunit ribosomal RNA gene partial sequence	0	0
KU244082.1 Aquilaria crassna voucher FBL01012 internal transcribed spacer 1 partial sequence 5.8S ribosomal RNA gene complete sequence and internal transcribed spacer 2 partial sequence	KY817967.1 Aquilaria crassna voucher ML-3 small subunit ribosomal RNA gene partial sequence internal transcribed spacer 1 5.8S ribosomal RNA gene and internal transcribed spacer 2 complete sequence and large subunit ribosomal RNA gene partial sequence	0	0
KT364478.1 Aquilaria crassna voucher FBL01012 internal transcribed spacer 1 partial sequence 5.8S ribosomal RNA gene complete sequence and internal transcribed spacer 2 partial sequence	KY817967.1 Aquilaria crassna voucher ML-3 small subunit ribosomal RNA gene partial sequence internal transcribed spacer 1 5.8S ribosomal RNA gene and internal transcribed spacer 2 complete sequence and large subunit ribosomal RNA gene partial sequence	0	0
KY817982.1 Aquilaria crassna voucher S-9 small subunit ribosomal RNA gene partial sequence internal transcribed spacer 1 5.8S ribosomal RNA gene and internal transcribed spacer 2 complete sequence and large subunit ribosomal RNA gene partial sequence	KY817967.1 Aquilaria crassna voucher ML-3 small subunit ribosomal RNA gene partial sequence internal transcribed spacer 1 5.8S ribosomal RNA gene and internal transcribed spacer 2 complete sequence and large subunit ribosomal RNA gene partial sequence	0	0
KY817979.1 Aquilaria crassna voucher S-1 small subunit ribosomal RNA gene partial sequence internal transcribed spacer 1 5.8S ribosomal RNA gene and internal transcribed spacer 2 complete sequence and large subunit ribosomal RNA gene partial sequence	KY817967.1 Aquilaria crassna voucher ML-3 small subunit ribosomal RNA gene partial sequence internal transcribed spacer 1 5.8S ribosomal RNA gene and internal transcribed spacer 2 complete sequence and large subunit ribosomal RNA gene partial sequence	0	0
KY817973.1 Aquilaria crassna voucher ML-9 small subunit ribosomal RNA gene partial sequence internal transcribed spacer 1 5.8S ribosomal RNA gene and internal transcribed spacer 2 complete sequence and large subunit ribosomal RNA gene partial sequence	KY817967.1 Aquilaria crassna voucher ML-3 small subunit ribosomal RNA gene partial sequence internal transcribed spacer 1 5.8S ribosomal RNA gene and internal transcribed spacer 2 complete sequence and large subunit ribosomal RNA gene partial sequence	0	0
KY817972.1 Aquilaria crassna voucher ML-8 small subunit ribosomal RNA gene partial sequence internal transcribed spacer 1 5.8S ribosomal RNA gene and internal transcribed spacer 2 complete sequence and large subunit ribosomal RNA gene partial sequence	KY817967.1 Aquilaria crassna voucher ML-3 small subunit ribosomal RNA gene partial sequence internal transcribed spacer 1 5.8S ribosomal RNA gene and internal transcribed spacer 2 complete sequence and large subunit ribosomal RNA gene partial sequence	0	0
KY817971.1 Aquilaria crassna voucher ML-7 small subunit ribosomal RNA gene partial sequence internal transcribed spacer 1 5.8S ribosomal RNA gene and internal transcribed spacer 2 complete sequence and large subunit ribosomal RNA gene partial sequence	KY817967.1 Aquilaria crassna voucher ML-3 small subunit ribosomal RNA gene partial sequence internal transcribed spacer 1 5.8S ribosomal RNA gene and internal transcribed spacer 2 complete sequence and large subunit ribosomal RNA gene partial sequence	0	0
KY817970.1 Aquilaria crassna voucher ML-6 small subunit ribosomal RNA gene partial sequence internal transcribed spacer 1 5.8S ribosomal RNA gene and internal transcribed spacer 2 complete sequence and large subunit ribosomal RNA gene partial sequence	KY817967.1 Aquilaria crassna voucher ML-3 small subunit ribosomal RNA gene partial sequence internal transcribed spacer 1 5.8S ribosomal RNA gene and internal transcribed spacer 2 complete sequence and large subunit ribosomal RNA gene partial sequence	0	0
KY817969.1 Aquilaria crassna voucher ML-5 small subunit ribosomal RNA gene partial sequence internal transcribed spacer 1 5.8S ribosomal RNA gene and internal transcribed spacer 2 complete sequence and large subunit ribosomal RNA gene partial sequence	KY817967.1 Aquilaria crassna voucher ML-3 small subunit ribosomal RNA gene partial sequence internal transcribed spacer 1 5.8S ribosomal RNA gene and internal transcribed spacer 2 complete sequence and large subunit ribosomal RNA gene partial sequence	0	0
KY817968.1 Aquilaria crassna voucher ML-4 small subunit ribosomal RNA gene partial sequence internal transcribed spacer 1 5.8S ribosomal RNA gene and internal transcribed spacer 2 complete sequence and large subunit ribosomal RNA gene partial sequence	KY817967.1 Aquilaria crassna voucher ML-3 small subunit ribosomal RNA gene partial sequence internal transcribed spacer 1 5.8S ribosomal RNA gene and internal transcribed spacer 2 complete sequence and large subunit ribosomal RNA gene partial sequence	0	0
MH134137.1 Aquilaria agallochum internal transcribed spacer 1 partial sequence 5.8S ribosomal RNA gene complete sequence and internal transcribed spacer 2 partial sequence_{aga}	KY817964.1 Aquilaria crassna voucher CS-13 small subunit ribosomal RNA gene partial sequence internal transcribed spacer 1 5.8S ribosomal RNA gene and internal transcribed spacer 2 complete sequence and large subunit ribosomal RNA gene partial sequence	0.0165072	0.0059524
KU879012.1 Aquilaria agallochum 18S ribosomal RNA gene partial sequence internal transcribed spacer 1 5.8S ribosomal RNA gene and internal transcribed spacer 2 complete sequence and 28S ribosomal RNA gene partial sequence_{aga}	KY817964.1 Aquilaria crassna voucher CS-13 small subunit ribosomal RNA gene partial sequence internal transcribed spacer 1 5.8S ribosomal RNA gene and internal transcribed spacer 2 complete sequence and large subunit ribosomal RNA gene partial sequence	0.0221253	0.00719082
MH134138.1 Aquilaria beccariana internal transcribed spacer 1 partial sequence 5.8S ribosomal RNA gene complete sequence and internal transcribed spacer 2 partial sequence_{aga}	KY817964.1 Aquilaria crassna voucher CS-13 small subunit ribosomal RNA gene partial sequence internal transcribed spacer 1 5.8S ribosomal RNA gene and internal transcribed spacer 2 complete sequence and large subunit ribosomal RNA gene partial sequence	0.0220708	0.00727399
KT779116.1 Aquilaria beccariana voucher FBL04001 internal transcribed spacer 1 partial sequence 5.8S ribosomal RNA gene complete sequence and internal transcribed spacer 2 partial sequence_{aga}	KY817964.1 Aquilaria crassna voucher CS-13 small subunit ribosomal RNA gene partial sequence internal transcribed spacer 1 5.8S ribosomal RNA gene and internal transcribed spacer 2 complete sequence and large subunit ribosomal RNA gene partial sequence	0.0421308	0.0101917
KT364477.1 Aquilaria beccariana voucher SFN29381 internal transcribed spacer 1 partial sequence 5.8S ribosomal RNA gene complete sequence and internal transcribed spacer 2 partial sequence_{aga}	KY817964.1 Aquilaria crassna voucher CS-13 small subunit ribosomal RNA gene partial sequence internal transcribed spacer 1 5.8S ribosomal RNA gene and internal transcribed spacer 2 complete sequence and large subunit ribosomal RNA gene partial sequence	0.0221534	0.00722737
KX351419.1 Aquilaria beccariana voucher S1 5.8S ribosomal RNA gene partial sequence internal transcribed spacer 2 complete sequence and large subunit ribosomal RNA gene partial sequence_{aga}	KY817964.1 Aquilaria crassna voucher CS-13 small subunit ribosomal RNA gene partial sequence internal transcribed spacer 1 5.8S ribosomal RNA gene and internal transcribed spacer 2 complete sequence and large subunit ribosomal RNA gene partial sequence	0	0
KX424704.1 Aquilaria beccariana 5.8S ribosomal RNA gene partial sequence internal transcribed spacer 2 complete sequence and 28S ribosomal RNA gene partial sequence_{aga}	KY817964.1 Aquilaria crassna voucher CS-13 small subunit ribosomal RNA gene partial sequence internal transcribed spacer 1 5.8S ribosomal RNA gene and internal transcribed spacer 2 complete sequence and large subunit ribosomal RNA gene partial sequence	0.0438711	0.011062
KU238038.1 Aquilaria crassna voucher FBL G11 WC3 internal transcribed spacer 2 partial sequence	KY817964.1 Aquilaria crassna voucher CS-13 small subunit ribosomal RNA gene partial sequence internal transcribed spacer 1 5.8S ribosomal RNA gene and internal transcribed spacer 2 complete sequence and large subunit ribosomal RNA gene partial sequence	0	0
MH134139.1 Aquilaria crassna internal transcribed spacer 1 partial sequence 5.8S ribosomal RNA gene complete sequence and internal transcribed spacer 2 partial sequence	KY817964.1 Aquilaria crassna voucher CS-13 small subunit ribosomal RNA gene partial sequence internal transcribed spacer 1 5.8S ribosomal RNA gene and internal transcribed spacer 2 complete sequence and large subunit ribosomal RNA gene partial sequence	0	0
KU244111.1 Aquilaria crassna voucher FBL01017 internal transcribed spacer 2 partial sequence	KY817964.1 Aquilaria crassna voucher CS-13 small subunit ribosomal RNA gene partial sequence internal transcribed spacer 1 5.8S ribosomal RNA gene and internal transcribed spacer 2 complete sequence and large subunit ribosomal RNA gene partial sequence	0	0
KU244110.1 Aquilaria crassna voucher FBL01014 internal transcribed spacer 2 partial sequence	KY817964.1 Aquilaria crassna voucher CS-13 small subunit ribosomal RNA gene partial sequence internal transcribed spacer 1 5.8S ribosomal RNA gene and internal transcribed spacer 2 complete sequence and large subunit ribosomal RNA gene partial sequence	0	0
KU244109.1 Aquilaria crassna voucher FBL01013 internal transcribed spacer 2 partial sequence	KY817964.1 Aquilaria crassna voucher CS-13 small subunit ribosomal RNA gene partial sequence internal transcribed spacer 1 5.8S ribosomal RNA gene and internal transcribed spacer 2 complete sequence and large subunit ribosomal RNA gene partial sequence	0	0
KU244108.1 Aquilaria crassna voucher FBL01012 internal transcribed spacer 2 partial sequence	KY817964.1 Aquilaria crassna voucher CS-13 small subunit ribosomal RNA gene partial sequence internal transcribed spacer 1 5.8S ribosomal RNA gene and internal transcribed spacer 2 complete sequence and large subunit ribosomal RNA gene partial sequence	0	0
KU238037.1 Aquilaria crassna voucher FBL G10 WC2 internal transcribed spacer 2 partial sequence	KY817964.1 Aquilaria crassna voucher CS-13 small subunit ribosomal RNA gene partial sequence internal transcribed spacer 1 5.8S ribosomal RNA gene and internal transcribed spacer 2 complete sequence and large subunit ribosomal RNA gene partial sequence	0.0027248	0.00273681
KU238035.1 Aquilaria crassna voucher FBL G04 WC1 internal transcribed spacer 2 partial sequence	KY817964.1 Aquilaria crassna voucher CS-13 small subunit ribosomal RNA gene partial sequence internal transcribed spacer 1 5.8S ribosomal RNA gene and internal transcribed spacer 2 complete sequence and large subunit ribosomal RNA gene partial sequence	0.0027248	0.00273681
KU244085.1 Aquilaria crassna voucher FBL01017 internal transcribed spacer 1 partial sequence 5.8S ribosomal RNA gene complete sequence and internal transcribed spacer 2 partial sequence	KY817964.1 Aquilaria crassna voucher CS-13 small subunit ribosomal RNA gene partial sequence internal transcribed spacer 1 5.8S ribosomal RNA gene and internal transcribed spacer 2 complete sequence and large subunit ribosomal RNA gene partial sequence	0	0
KU244084.1 Aquilaria crassna voucher FBL01014 internal transcribed spacer 1 partial sequence 5.8S ribosomal RNA gene complete sequence and internal transcribed spacer 2 partial sequence	KY817964.1 Aquilaria crassna voucher CS-13 small subunit ribosomal RNA gene partial sequence internal transcribed spacer 1 5.8S ribosomal RNA gene and internal transcribed spacer 2 complete sequence and large subunit ribosomal RNA gene partial sequence	0	0
KU244083.1 Aquilaria crassna voucher FBL01013 internal transcribed spacer 1 partial sequence 5.8S ribosomal RNA gene complete sequence and internal transcribed spacer 2 partial sequence_{cra}	KY817964.1 Aquilaria crassna voucher CS-13 small subunit ribosomal RNA gene partial sequence internal transcribed spacer 1 5.8S ribosomal RNA gene and internal transcribed spacer 2 complete sequence and large subunit ribosomal RNA gene partial sequence	0	0
KU244082.1 Aquilaria crassna voucher FBL01012 internal transcribed spacer 1 partial sequence 5.8S ribosomal RNA gene complete sequence and internal transcribed spacer 2 partial sequence	KY817964.1 Aquilaria crassna voucher CS-13 small subunit ribosomal RNA gene partial sequence internal transcribed spacer 1 5.8S ribosomal RNA gene and internal transcribed spacer 2 complete sequence and large subunit ribosomal RNA gene partial sequence	0	0
KT364478.1 Aquilaria crassna voucher FBL01012 internal transcribed spacer 1 partial sequence 5.8S ribosomal RNA gene complete sequence and internal transcribed spacer 2 partial sequence	KY817964.1 Aquilaria crassna voucher CS-13 small subunit ribosomal RNA gene partial sequence internal transcribed spacer 1 5.8S ribosomal RNA gene and internal transcribed spacer 2 complete sequence and large subunit ribosomal RNA gene partial sequence	0	0
KY817982.1 Aquilaria crassna voucher S-9 small subunit ribosomal RNA gene partial sequence internal transcribed spacer 1 5.8S ribosomal RNA gene and internal transcribed spacer 2 complete sequence and large subunit ribosomal RNA gene partial sequence	KY817964.1 Aquilaria crassna voucher CS-13 small subunit ribosomal RNA gene partial sequence internal transcribed spacer 1 5.8S ribosomal RNA gene and internal transcribed spacer 2 complete sequence and large subunit ribosomal RNA gene partial sequence	0	0
KY817979.1 Aquilaria crassna voucher S-1 small subunit ribosomal RNA gene partial sequence internal transcribed spacer 1 5.8S ribosomal RNA gene and internal transcribed spacer 2 complete sequence and large subunit ribosomal RNA gene partial sequence	KY817964.1 Aquilaria crassna voucher CS-13 small subunit ribosomal RNA gene partial sequence internal transcribed spacer 1 5.8S ribosomal RNA gene and internal transcribed spacer 2 complete sequence and large subunit ribosomal RNA gene partial sequence	0	0
KY817973.1 Aquilaria crassna voucher ML-9 small subunit ribosomal RNA gene partial sequence internal transcribed spacer 1 5.8S ribosomal RNA gene and internal transcribed spacer 2 complete sequence and large subunit ribosomal RNA gene partial sequence	KY817964.1 Aquilaria crassna voucher CS-13 small subunit ribosomal RNA gene partial sequence internal transcribed spacer 1 5.8S ribosomal RNA gene and internal transcribed spacer 2 complete sequence and large subunit ribosomal RNA gene partial sequence	0	0
KY817972.1 Aquilaria crassna voucher ML-8 small subunit ribosomal RNA gene partial sequence internal transcribed spacer 1 5.8S ribosomal RNA gene and internal transcribed spacer 2 complete sequence and large subunit ribosomal RNA gene partial sequence	KY817964.1 Aquilaria crassna voucher CS-13 small subunit ribosomal RNA gene partial sequence internal transcribed spacer 1 5.8S ribosomal RNA gene and internal transcribed spacer 2 complete sequence and large subunit ribosomal RNA gene partial sequence	0	0
KY817971.1 Aquilaria crassna voucher ML-7 small subunit ribosomal RNA gene partial sequence internal transcribed spacer 1 5.8S ribosomal RNA gene and internal transcribed spacer 2 complete sequence and large subunit ribosomal RNA gene partial sequence	KY817964.1 Aquilaria crassna voucher CS-13 small subunit ribosomal RNA gene partial sequence internal transcribed spacer 1 5.8S ribosomal RNA gene and internal transcribed spacer 2 complete sequence and large subunit ribosomal RNA gene partial sequence	0	0
KY817970.1 Aquilaria crassna voucher ML-6 small subunit ribosomal RNA gene partial sequence internal transcribed spacer 1 5.8S ribosomal RNA gene and internal transcribed spacer 2 complete sequence and large subunit ribosomal RNA gene partial sequence	KY817964.1 Aquilaria crassna voucher CS-13 small subunit ribosomal RNA gene partial sequence internal transcribed spacer 1 5.8S ribosomal RNA gene and internal transcribed spacer 2 complete sequence and large subunit ribosomal RNA gene partial sequence	0	0
KY817969.1 Aquilaria crassna voucher ML-5 small subunit ribosomal RNA gene partial sequence internal transcribed spacer 1 5.8S ribosomal RNA gene and internal transcribed spacer 2 complete sequence and large subunit ribosomal RNA gene partial sequence	KY817964.1 Aquilaria crassna voucher CS-13 small subunit ribosomal RNA gene partial sequence internal transcribed spacer 1 5.8S ribosomal RNA gene and internal transcribed spacer 2 complete sequence and large subunit ribosomal RNA gene partial sequence	0	0
KY817968.1 Aquilaria crassna voucher ML-4 small subunit ribosomal RNA gene partial sequence internal transcribed spacer 1 5.8S ribosomal RNA gene and internal transcribed spacer 2 complete sequence and large subunit ribosomal RNA gene partial sequence	KY817964.1 Aquilaria crassna voucher CS-13 small subunit ribosomal RNA gene partial sequence internal transcribed spacer 1 5.8S ribosomal RNA gene and internal transcribed spacer 2 complete sequence and large subunit ribosomal RNA gene partial sequence	0	0
KY817967.1 Aquilaria crassna voucher ML-3 small subunit ribosomal RNA gene partial sequence internal transcribed spacer 1 5.8S ribosomal RNA gene and internal transcribed spacer 2 complete sequence and large subunit ribosomal RNA gene partial sequence	KY817964.1 Aquilaria crassna voucher CS-13 small subunit ribosomal RNA gene partial sequence internal transcribed spacer 1 5.8S ribosomal RNA gene and internal transcribed spacer 2 complete sequence and large subunit ribosomal RNA gene partial sequence	0	0
MH134137.1 Aquilaria agallochum internal transcribed spacer 1 partial sequence 5.8S ribosomal RNA gene complete sequence and internal transcribed spacer 2 partial sequence_{aga}	KY817963.1 Aquilaria crassna voucher CS-12 small subunit ribosomal RNA gene partial sequence internal transcribed spacer 1 5.8S ribosomal RNA gene and internal transcribed spacer 2 complete sequence and large subunit ribosomal RNA gene partial sequence	0.0165072	0.0059524
KU879012.1 Aquilaria agallochum 18S ribosomal RNA gene partial sequence internal transcribed spacer 1 5.8S ribosomal RNA gene and internal transcribed spacer 2 complete sequence and 28S ribosomal RNA gene partial sequence_{aga}	KY817963.1 Aquilaria crassna voucher CS-12 small subunit ribosomal RNA gene partial sequence internal transcribed spacer 1 5.8S ribosomal RNA gene and internal transcribed spacer 2 complete sequence and large subunit ribosomal RNA gene partial sequence	0.0221253	0.00719082
MH134138.1 Aquilaria beccariana internal transcribed spacer 1 partial sequence 5.8S ribosomal RNA gene complete sequence and internal transcribed spacer 2 partial sequence_{aga}	KY817963.1 Aquilaria crassna voucher CS-12 small subunit ribosomal RNA gene partial sequence internal transcribed spacer 1 5.8S ribosomal RNA gene and internal transcribed spacer 2 complete sequence and large subunit ribosomal RNA gene partial sequence	0.0220708	0.00727399
KT779116.1 Aquilaria beccariana voucher FBL04001 internal transcribed spacer 1 partial sequence 5.8S ribosomal RNA gene complete sequence and internal transcribed spacer 2 partial sequence_{aga}	KY817963.1 Aquilaria crassna voucher CS-12 small subunit ribosomal RNA gene partial sequence internal transcribed spacer 1 5.8S ribosomal RNA gene and internal transcribed spacer 2 complete sequence and large subunit ribosomal RNA gene partial sequence	0.0421308	0.0101917
KT364477.1 Aquilaria beccariana voucher SFN29381 internal transcribed spacer 1 partial sequence 5.8S ribosomal RNA gene complete sequence and internal transcribed spacer 2 partial sequence_{aga}	KY817963.1 Aquilaria crassna voucher CS-12 small subunit ribosomal RNA gene partial sequence internal transcribed spacer 1 5.8S ribosomal RNA gene and internal transcribed spacer 2 complete sequence and large subunit ribosomal RNA gene partial sequence	0.0221534	0.00722737
KX351419.1 Aquilaria beccariana voucher S1 5.8S ribosomal RNA gene partial sequence internal transcribed spacer 2 complete sequence and large subunit ribosomal RNA gene partial sequence_{aga}	KY817963.1 Aquilaria crassna voucher CS-12 small subunit ribosomal RNA gene partial sequence internal transcribed spacer 1 5.8S ribosomal RNA gene and internal transcribed spacer 2 complete sequence and large subunit ribosomal RNA gene partial sequence	0	0
KX424704.1 Aquilaria beccariana 5.8S ribosomal RNA gene partial sequence internal transcribed spacer 2 complete sequence and 28S ribosomal RNA gene partial sequence_{aga}	KY817963.1 Aquilaria crassna voucher CS-12 small subunit ribosomal RNA gene partial sequence internal transcribed spacer 1 5.8S ribosomal RNA gene and internal transcribed spacer 2 complete sequence and large subunit ribosomal RNA gene partial sequence	0.0438711	0.011062
KU238038.1 Aquilaria crassna voucher FBL G11 WC3 internal transcribed spacer 2 partial sequence	KY817963.1 Aquilaria crassna voucher CS-12 small subunit ribosomal RNA gene partial sequence internal transcribed spacer 1 5.8S ribosomal RNA gene and internal transcribed spacer 2 complete sequence and large subunit ribosomal RNA gene partial sequence	0	0
MH134139.1 Aquilaria crassna internal transcribed spacer 1 partial sequence 5.8S ribosomal RNA gene complete sequence and internal transcribed spacer 2 partial sequence	KY817963.1 Aquilaria crassna voucher CS-12 small subunit ribosomal RNA gene partial sequence internal transcribed spacer 1 5.8S ribosomal RNA gene and internal transcribed spacer 2 complete sequence and large subunit ribosomal RNA gene partial sequence	0	0
KU244111.1 Aquilaria crassna voucher FBL01017 internal transcribed spacer 2 partial sequence	KY817963.1 Aquilaria crassna voucher CS-12 small subunit ribosomal RNA gene partial sequence internal transcribed spacer 1 5.8S ribosomal RNA gene and internal transcribed spacer 2 complete sequence and large subunit ribosomal RNA gene partial sequence	0	0
KU244110.1 Aquilaria crassna voucher FBL01014 internal transcribed spacer 2 partial sequence	KY817963.1 Aquilaria crassna voucher CS-12 small subunit ribosomal RNA gene partial sequence internal transcribed spacer 1 5.8S ribosomal RNA gene and internal transcribed spacer 2 complete sequence and large subunit ribosomal RNA gene partial sequence	0	0
KU244109.1 Aquilaria crassna voucher FBL01013 internal transcribed spacer 2 partial sequence	KY817963.1 Aquilaria crassna voucher CS-12 small subunit ribosomal RNA gene partial sequence internal transcribed spacer 1 5.8S ribosomal RNA gene and internal transcribed spacer 2 complete sequence and large subunit ribosomal RNA gene partial sequence	0	0
KU244108.1 Aquilaria crassna voucher FBL01012 internal transcribed spacer 2 partial sequence	KY817963.1 Aquilaria crassna voucher CS-12 small subunit ribosomal RNA gene partial sequence internal transcribed spacer 1 5.8S ribosomal RNA gene and internal transcribed spacer 2 complete sequence and large subunit ribosomal RNA gene partial sequence	0	0
KU238037.1 Aquilaria crassna voucher FBL G10 WC2 internal transcribed spacer 2 partial sequence	KY817963.1 Aquilaria crassna voucher CS-12 small subunit ribosomal RNA gene partial sequence internal transcribed spacer 1 5.8S ribosomal RNA gene and internal transcribed spacer 2 complete sequence and large subunit ribosomal RNA gene partial sequence	0.0027248	0.00273681
KU238035.1 Aquilaria crassna voucher FBL G04 WC1 internal transcribed spacer 2 partial sequence	KY817963.1 Aquilaria crassna voucher CS-12 small subunit ribosomal RNA gene partial sequence internal transcribed spacer 1 5.8S ribosomal RNA gene and internal transcribed spacer 2 complete sequence and large subunit ribosomal RNA gene partial sequence	0.0027248	0.00273681
KU244085.1 Aquilaria crassna voucher FBL01017 internal transcribed spacer 1 partial sequence 5.8S ribosomal RNA gene complete sequence and internal transcribed spacer 2 partial sequence	KY817963.1 Aquilaria crassna voucher CS-12 small subunit ribosomal RNA gene partial sequence internal transcribed spacer 1 5.8S ribosomal RNA gene and internal transcribed spacer 2 complete sequence and large subunit ribosomal RNA gene partial sequence	0	0
KU244084.1 Aquilaria crassna voucher FBL01014 internal transcribed spacer 1 partial sequence 5.8S ribosomal RNA gene complete sequence and internal transcribed spacer 2 partial sequence	KY817963.1 Aquilaria crassna voucher CS-12 small subunit ribosomal RNA gene partial sequence internal transcribed spacer 1 5.8S ribosomal RNA gene and internal transcribed spacer 2 complete sequence and large subunit ribosomal RNA gene partial sequence	0	0
KU244083.1 Aquilaria crassna voucher FBL01013 internal transcribed spacer 1 partial sequence 5.8S ribosomal RNA gene complete sequence and internal transcribed spacer 2 partial sequence_{cra}	KY817963.1 Aquilaria crassna voucher CS-12 small subunit ribosomal RNA gene partial sequence internal transcribed spacer 1 5.8S ribosomal RNA gene and internal transcribed spacer 2 complete sequence and large subunit ribosomal RNA gene partial sequence	0	0
KU244082.1 Aquilaria crassna voucher FBL01012 internal transcribed spacer 1 partial sequence 5.8S ribosomal RNA gene complete sequence and internal transcribed spacer 2 partial sequence	KY817963.1 Aquilaria crassna voucher CS-12 small subunit ribosomal RNA gene partial sequence internal transcribed spacer 1 5.8S ribosomal RNA gene and internal transcribed spacer 2 complete sequence and large subunit ribosomal RNA gene partial sequence	0	0
KT364478.1 Aquilaria crassna voucher FBL01012 internal transcribed spacer 1 partial sequence 5.8S ribosomal RNA gene complete sequence and internal transcribed spacer 2 partial sequence	KY817963.1 Aquilaria crassna voucher CS-12 small subunit ribosomal RNA gene partial sequence internal transcribed spacer 1 5.8S ribosomal RNA gene and internal transcribed spacer 2 complete sequence and large subunit ribosomal RNA gene partial sequence	0	0
KY817982.1 Aquilaria crassna voucher S-9 small subunit ribosomal RNA gene partial sequence internal transcribed spacer 1 5.8S ribosomal RNA gene and internal transcribed spacer 2 complete sequence and large subunit ribosomal RNA gene partial sequence	KY817963.1 Aquilaria crassna voucher CS-12 small subunit ribosomal RNA gene partial sequence internal transcribed spacer 1 5.8S ribosomal RNA gene and internal transcribed spacer 2 complete sequence and large subunit ribosomal RNA gene partial sequence	0	0
KY817979.1 Aquilaria crassna voucher S-1 small subunit ribosomal RNA gene partial sequence internal transcribed spacer 1 5.8S ribosomal RNA gene and internal transcribed spacer 2 complete sequence and large subunit ribosomal RNA gene partial sequence	KY817963.1 Aquilaria crassna voucher CS-12 small subunit ribosomal RNA gene partial sequence internal transcribed spacer 1 5.8S ribosomal RNA gene and internal transcribed spacer 2 complete sequence and large subunit ribosomal RNA gene partial sequence	0	0
KY817973.1 Aquilaria crassna voucher ML-9 small subunit ribosomal RNA gene partial sequence internal transcribed spacer 1 5.8S ribosomal RNA gene and internal transcribed spacer 2 complete sequence and large subunit ribosomal RNA gene partial sequence	KY817963.1 Aquilaria crassna voucher CS-12 small subunit ribosomal RNA gene partial sequence internal transcribed spacer 1 5.8S ribosomal RNA gene and internal transcribed spacer 2 complete sequence and large subunit ribosomal RNA gene partial sequence	0	0
KY817972.1 Aquilaria crassna voucher ML-8 small subunit ribosomal RNA gene partial sequence internal transcribed spacer 1 5.8S ribosomal RNA gene and internal transcribed spacer 2 complete sequence and large subunit ribosomal RNA gene partial sequence	KY817963.1 Aquilaria crassna voucher CS-12 small subunit ribosomal RNA gene partial sequence internal transcribed spacer 1 5.8S ribosomal RNA gene and internal transcribed spacer 2 complete sequence and large subunit ribosomal RNA gene partial sequence	0	0
KY817971.1 Aquilaria crassna voucher ML-7 small subunit ribosomal RNA gene partial sequence internal transcribed spacer 1 5.8S ribosomal RNA gene and internal transcribed spacer 2 complete sequence and large subunit ribosomal RNA gene partial sequence	KY817963.1 Aquilaria crassna voucher CS-12 small subunit ribosomal RNA gene partial sequence internal transcribed spacer 1 5.8S ribosomal RNA gene and internal transcribed spacer 2 complete sequence and large subunit ribosomal RNA gene partial sequence	0	0
KY817970.1 Aquilaria crassna voucher ML-6 small subunit ribosomal RNA gene partial sequence internal transcribed spacer 1 5.8S ribosomal RNA gene and internal transcribed spacer 2 complete sequence and large subunit ribosomal RNA gene partial sequence	KY817963.1 Aquilaria crassna voucher CS-12 small subunit ribosomal RNA gene partial sequence internal transcribed spacer 1 5.8S ribosomal RNA gene and internal transcribed spacer 2 complete sequence and large subunit ribosomal RNA gene partial sequence	0	0
KY817969.1 Aquilaria crassna voucher ML-5 small subunit ribosomal RNA gene partial sequence internal transcribed spacer 1 5.8S ribosomal RNA gene and internal transcribed spacer 2 complete sequence and large subunit ribosomal RNA gene partial sequence	KY817963.1 Aquilaria crassna voucher CS-12 small subunit ribosomal RNA gene partial sequence internal transcribed spacer 1 5.8S ribosomal RNA gene and internal transcribed spacer 2 complete sequence and large subunit ribosomal RNA gene partial sequence	0	0
KY817968.1 Aquilaria crassna voucher ML-4 small subunit ribosomal RNA gene partial sequence internal transcribed spacer 1 5.8S ribosomal RNA gene and internal transcribed spacer 2 complete sequence and large subunit ribosomal RNA gene partial sequence	KY817963.1 Aquilaria crassna voucher CS-12 small subunit ribosomal RNA gene partial sequence internal transcribed spacer 1 5.8S ribosomal RNA gene and internal transcribed spacer 2 complete sequence and large subunit ribosomal RNA gene partial sequence	0	0
KY817967.1 Aquilaria crassna voucher ML-3 small subunit ribosomal RNA gene partial sequence internal transcribed spacer 1 5.8S ribosomal RNA gene and internal transcribed spacer 2 complete sequence and large subunit ribosomal RNA gene partial sequence	KY817963.1 Aquilaria crassna voucher CS-12 small subunit ribosomal RNA gene partial sequence internal transcribed spacer 1 5.8S ribosomal RNA gene and internal transcribed spacer 2 complete sequence and large subunit ribosomal RNA gene partial sequence	0	0
KY817964.1 Aquilaria crassna voucher CS-13 small subunit ribosomal RNA gene partial sequence internal transcribed spacer 1 5.8S ribosomal RNA gene and internal transcribed spacer 2 complete sequence and large subunit ribosomal RNA gene partial sequence	KY817963.1 Aquilaria crassna voucher CS-12 small subunit ribosomal RNA gene partial sequence internal transcribed spacer 1 5.8S ribosomal RNA gene and internal transcribed spacer 2 complete sequence and large subunit ribosomal RNA gene partial sequence	0	0
MH134137.1 Aquilaria agallochum internal transcribed spacer 1 partial sequence 5.8S ribosomal RNA gene complete sequence and internal transcribed spacer 2 partial sequence_{aga}	KY817962.1 Aquilaria crassna voucher CS-11 small subunit ribosomal RNA gene partial sequence internal transcribed spacer 1 5.8S ribosomal RNA gene and internal transcribed spacer 2 complete sequence and large subunit ribosomal RNA gene partial sequence	0.0165072	0.0059524
KU879012.1 Aquilaria agallochum 18S ribosomal RNA gene partial sequence internal transcribed spacer 1 5.8S ribosomal RNA gene and internal transcribed spacer 2 complete sequence and 28S ribosomal RNA gene partial sequence_{aga}	KY817962.1 Aquilaria crassna voucher CS-11 small subunit ribosomal RNA gene partial sequence internal transcribed spacer 1 5.8S ribosomal RNA gene and internal transcribed spacer 2 complete sequence and large subunit ribosomal RNA gene partial sequence	0.0221253	0.00719082
MH134138.1 Aquilaria beccariana internal transcribed spacer 1 partial sequence 5.8S ribosomal RNA gene complete sequence and internal transcribed spacer 2 partial sequence_{aga}	KY817962.1 Aquilaria crassna voucher CS-11 small subunit ribosomal RNA gene partial sequence internal transcribed spacer 1 5.8S ribosomal RNA gene and internal transcribed spacer 2 complete sequence and large subunit ribosomal RNA gene partial sequence	0.0220708	0.00727399
KT779116.1 Aquilaria beccariana voucher FBL04001 internal transcribed spacer 1 partial sequence 5.8S ribosomal RNA gene complete sequence and internal transcribed spacer 2 partial sequence_{aga}	KY817962.1 Aquilaria crassna voucher CS-11 small subunit ribosomal RNA gene partial sequence internal transcribed spacer 1 5.8S ribosomal RNA gene and internal transcribed spacer 2 complete sequence and large subunit ribosomal RNA gene partial sequence	0.0421308	0.0101917
KT364477.1 Aquilaria beccariana voucher SFN29381 internal transcribed spacer 1 partial sequence 5.8S ribosomal RNA gene complete sequence and internal transcribed spacer 2 partial sequence_{aga}	KY817962.1 Aquilaria crassna voucher CS-11 small subunit ribosomal RNA gene partial sequence internal transcribed spacer 1 5.8S ribosomal RNA gene and internal transcribed spacer 2 complete sequence and large subunit ribosomal RNA gene partial sequence	0.0221534	0.00722737
KX351419.1 Aquilaria beccariana voucher S1 5.8S ribosomal RNA gene partial sequence internal transcribed spacer 2 complete sequence and large subunit ribosomal RNA gene partial sequence_{aga}	KY817962.1 Aquilaria crassna voucher CS-11 small subunit ribosomal RNA gene partial sequence internal transcribed spacer 1 5.8S ribosomal RNA gene and internal transcribed spacer 2 complete sequence and large subunit ribosomal RNA gene partial sequence	0	0
KX424704.1 Aquilaria beccariana 5.8S ribosomal RNA gene partial sequence internal transcribed spacer 2 complete sequence and 28S ribosomal RNA gene partial sequence_{aga}	KY817962.1 Aquilaria crassna voucher CS-11 small subunit ribosomal RNA gene partial sequence internal transcribed spacer 1 5.8S ribosomal RNA gene and internal transcribed spacer 2 complete sequence and large subunit ribosomal RNA gene partial sequence	0.0438711	0.011062
KU238038.1 Aquilaria crassna voucher FBL G11 WC3 internal transcribed spacer 2 partial sequence	KY817962.1 Aquilaria crassna voucher CS-11 small subunit ribosomal RNA gene partial sequence internal transcribed spacer 1 5.8S ribosomal RNA gene and internal transcribed spacer 2 complete sequence and large subunit ribosomal RNA gene partial sequence	0	0
MH134139.1 Aquilaria crassna internal transcribed spacer 1 partial sequence 5.8S ribosomal RNA gene complete sequence and internal transcribed spacer 2 partial sequence	KY817962.1 Aquilaria crassna voucher CS-11 small subunit ribosomal RNA gene partial sequence internal transcribed spacer 1 5.8S ribosomal RNA gene and internal transcribed spacer 2 complete sequence and large subunit ribosomal RNA gene partial sequence	0	0
KU244111.1 Aquilaria crassna voucher FBL01017 internal transcribed spacer 2 partial sequence	KY817962.1 Aquilaria crassna voucher CS-11 small subunit ribosomal RNA gene partial sequence internal transcribed spacer 1 5.8S ribosomal RNA gene and internal transcribed spacer 2 complete sequence and large subunit ribosomal RNA gene partial sequence	0	0
KU244110.1 Aquilaria crassna voucher FBL01014 internal transcribed spacer 2 partial sequence	KY817962.1 Aquilaria crassna voucher CS-11 small subunit ribosomal RNA gene partial sequence internal transcribed spacer 1 5.8S ribosomal RNA gene and internal transcribed spacer 2 complete sequence and large subunit ribosomal RNA gene partial sequence	0	0
KU244109.1 Aquilaria crassna voucher FBL01013 internal transcribed spacer 2 partial sequence	KY817962.1 Aquilaria crassna voucher CS-11 small subunit ribosomal RNA gene partial sequence internal transcribed spacer 1 5.8S ribosomal RNA gene and internal transcribed spacer 2 complete sequence and large subunit ribosomal RNA gene partial sequence	0	0
KU244108.1 Aquilaria crassna voucher FBL01012 internal transcribed spacer 2 partial sequence	KY817962.1 Aquilaria crassna voucher CS-11 small subunit ribosomal RNA gene partial sequence internal transcribed spacer 1 5.8S ribosomal RNA gene and internal transcribed spacer 2 complete sequence and large subunit ribosomal RNA gene partial sequence	0	0
KU238037.1 Aquilaria crassna voucher FBL G10 WC2 internal transcribed spacer 2 partial sequence	KY817962.1 Aquilaria crassna voucher CS-11 small subunit ribosomal RNA gene partial sequence internal transcribed spacer 1 5.8S ribosomal RNA gene and internal transcribed spacer 2 complete sequence and large subunit ribosomal RNA gene partial sequence	0.0027248	0.00273681
KU238035.1 Aquilaria crassna voucher FBL G04 WC1 internal transcribed spacer 2 partial sequence	KY817962.1 Aquilaria crassna voucher CS-11 small subunit ribosomal RNA gene partial sequence internal transcribed spacer 1 5.8S ribosomal RNA gene and internal transcribed spacer 2 complete sequence and large subunit ribosomal RNA gene partial sequence	0.0027248	0.00273681
KU244085.1 Aquilaria crassna voucher FBL01017 internal transcribed spacer 1 partial sequence 5.8S ribosomal RNA gene complete sequence and internal transcribed spacer 2 partial sequence	KY817962.1 Aquilaria crassna voucher CS-11 small subunit ribosomal RNA gene partial sequence internal transcribed spacer 1 5.8S ribosomal RNA gene and internal transcribed spacer 2 complete sequence and large subunit ribosomal RNA gene partial sequence	0	0
KU244084.1 Aquilaria crassna voucher FBL01014 internal transcribed spacer 1 partial sequence 5.8S ribosomal RNA gene complete sequence and internal transcribed spacer 2 partial sequence	KY817962.1 Aquilaria crassna voucher CS-11 small subunit ribosomal RNA gene partial sequence internal transcribed spacer 1 5.8S ribosomal RNA gene and internal transcribed spacer 2 complete sequence and large subunit ribosomal RNA gene partial sequence	0	0
KU244083.1 Aquilaria crassna voucher FBL01013 internal transcribed spacer 1 partial sequence 5.8S ribosomal RNA gene complete sequence and internal transcribed spacer 2 partial sequence_{cra}	KY817962.1 Aquilaria crassna voucher CS-11 small subunit ribosomal RNA gene partial sequence internal transcribed spacer 1 5.8S ribosomal RNA gene and internal transcribed spacer 2 complete sequence and large subunit ribosomal RNA gene partial sequence	0	0
KU244082.1 Aquilaria crassna voucher FBL01012 internal transcribed spacer 1 partial sequence 5.8S ribosomal RNA gene complete sequence and internal transcribed spacer 2 partial sequence	KY817962.1 Aquilaria crassna voucher CS-11 small subunit ribosomal RNA gene partial sequence internal transcribed spacer 1 5.8S ribosomal RNA gene and internal transcribed spacer 2 complete sequence and large subunit ribosomal RNA gene partial sequence	0	0
KT364478.1 Aquilaria crassna voucher FBL01012 internal transcribed spacer 1 partial sequence 5.8S ribosomal RNA gene complete sequence and internal transcribed spacer 2 partial sequence	KY817962.1 Aquilaria crassna voucher CS-11 small subunit ribosomal RNA gene partial sequence internal transcribed spacer 1 5.8S ribosomal RNA gene and internal transcribed spacer 2 complete sequence and large subunit ribosomal RNA gene partial sequence	0	0
KY817982.1 Aquilaria crassna voucher S-9 small subunit ribosomal RNA gene partial sequence internal transcribed spacer 1 5.8S ribosomal RNA gene and internal transcribed spacer 2 complete sequence and large subunit ribosomal RNA gene partial sequence	KY817962.1 Aquilaria crassna voucher CS-11 small subunit ribosomal RNA gene partial sequence internal transcribed spacer 1 5.8S ribosomal RNA gene and internal transcribed spacer 2 complete sequence and large subunit ribosomal RNA gene partial sequence	0	0
KY817979.1 Aquilaria crassna voucher S-1 small subunit ribosomal RNA gene partial sequence internal transcribed spacer 1 5.8S ribosomal RNA gene and internal transcribed spacer 2 complete sequence and large subunit ribosomal RNA gene partial sequence	KY817962.1 Aquilaria crassna voucher CS-11 small subunit ribosomal RNA gene partial sequence internal transcribed spacer 1 5.8S ribosomal RNA gene and internal transcribed spacer 2 complete sequence and large subunit ribosomal RNA gene partial sequence	0	0
KY817973.1 Aquilaria crassna voucher ML-9 small subunit ribosomal RNA gene partial sequence internal transcribed spacer 1 5.8S ribosomal RNA gene and internal transcribed spacer 2 complete sequence and large subunit ribosomal RNA gene partial sequence	KY817962.1 Aquilaria crassna voucher CS-11 small subunit ribosomal RNA gene partial sequence internal transcribed spacer 1 5.8S ribosomal RNA gene and internal transcribed spacer 2 complete sequence and large subunit ribosomal RNA gene partial sequence	0	0
KY817972.1 Aquilaria crassna voucher ML-8 small subunit ribosomal RNA gene partial sequence internal transcribed spacer 1 5.8S ribosomal RNA gene and internal transcribed spacer 2 complete sequence and large subunit ribosomal RNA gene partial sequence	KY817962.1 Aquilaria crassna voucher CS-11 small subunit ribosomal RNA gene partial sequence internal transcribed spacer 1 5.8S ribosomal RNA gene and internal transcribed spacer 2 complete sequence and large subunit ribosomal RNA gene partial sequence	0	0
KY817971.1 Aquilaria crassna voucher ML-7 small subunit ribosomal RNA gene partial sequence internal transcribed spacer 1 5.8S ribosomal RNA gene and internal transcribed spacer 2 complete sequence and large subunit ribosomal RNA gene partial sequence	KY817962.1 Aquilaria crassna voucher CS-11 small subunit ribosomal RNA gene partial sequence internal transcribed spacer 1 5.8S ribosomal RNA gene and internal transcribed spacer 2 complete sequence and large subunit ribosomal RNA gene partial sequence	0	0
KY817970.1 Aquilaria crassna voucher ML-6 small subunit ribosomal RNA gene partial sequence internal transcribed spacer 1 5.8S ribosomal RNA gene and internal transcribed spacer 2 complete sequence and large subunit ribosomal RNA gene partial sequence	KY817962.1 Aquilaria crassna voucher CS-11 small subunit ribosomal RNA gene partial sequence internal transcribed spacer 1 5.8S ribosomal RNA gene and internal transcribed spacer 2 complete sequence and large subunit ribosomal RNA gene partial sequence	0	0
KY817969.1 Aquilaria crassna voucher ML-5 small subunit ribosomal RNA gene partial sequence internal transcribed spacer 1 5.8S ribosomal RNA gene and internal transcribed spacer 2 complete sequence and large subunit ribosomal RNA gene partial sequence	KY817962.1 Aquilaria crassna voucher CS-11 small subunit ribosomal RNA gene partial sequence internal transcribed spacer 1 5.8S ribosomal RNA gene and internal transcribed spacer 2 complete sequence and large subunit ribosomal RNA gene partial sequence	0	0
KY817968.1 Aquilaria crassna voucher ML-4 small subunit ribosomal RNA gene partial sequence internal transcribed spacer 1 5.8S ribosomal RNA gene and internal transcribed spacer 2 complete sequence and large subunit ribosomal RNA gene partial sequence	KY817962.1 Aquilaria crassna voucher CS-11 small subunit ribosomal RNA gene partial sequence internal transcribed spacer 1 5.8S ribosomal RNA gene and internal transcribed spacer 2 complete sequence and large subunit ribosomal RNA gene partial sequence	0	0
KY817967.1 Aquilaria crassna voucher ML-3 small subunit ribosomal RNA gene partial sequence internal transcribed spacer 1 5.8S ribosomal RNA gene and internal transcribed spacer 2 complete sequence and large subunit ribosomal RNA gene partial sequence	KY817962.1 Aquilaria crassna voucher CS-11 small subunit ribosomal RNA gene partial sequence internal transcribed spacer 1 5.8S ribosomal RNA gene and internal transcribed spacer 2 complete sequence and large subunit ribosomal RNA gene partial sequence	0	0
KY817964.1 Aquilaria crassna voucher CS-13 small subunit ribosomal RNA gene partial sequence internal transcribed spacer 1 5.8S ribosomal RNA gene and internal transcribed spacer 2 complete sequence and large subunit ribosomal RNA gene partial sequence	KY817962.1 Aquilaria crassna voucher CS-11 small subunit ribosomal RNA gene partial sequence internal transcribed spacer 1 5.8S ribosomal RNA gene and internal transcribed spacer 2 complete sequence and large subunit ribosomal RNA gene partial sequence	0	0
KY817963.1 Aquilaria crassna voucher CS-12 small subunit ribosomal RNA gene partial sequence internal transcribed spacer 1 5.8S ribosomal RNA gene and internal transcribed spacer 2 complete sequence and large subunit ribosomal RNA gene partial sequence	KY817962.1 Aquilaria crassna voucher CS-11 small subunit ribosomal RNA gene partial sequence internal transcribed spacer 1 5.8S ribosomal RNA gene and internal transcribed spacer 2 complete sequence and large subunit ribosomal RNA gene partial sequence	0	0
MH134137.1 Aquilaria agallochum internal transcribed spacer 1 partial sequence 5.8S ribosomal RNA gene complete sequence and internal transcribed spacer 2 partial sequence_{aga}	KY817961.1 Aquilaria crassna voucher CS-10 small subunit ribosomal RNA gene partial sequence internal transcribed spacer 1 5.8S ribosomal RNA gene and internal transcribed spacer 2 complete sequence and large subunit ribosomal RNA gene partial sequence	0.0165072	0.0059524
KU879012.1 Aquilaria agallochum 18S ribosomal RNA gene partial sequence internal transcribed spacer 1 5.8S ribosomal RNA gene and internal transcribed spacer 2 complete sequence and 28S ribosomal RNA gene partial sequence_{aga}	KY817961.1 Aquilaria crassna voucher CS-10 small subunit ribosomal RNA gene partial sequence internal transcribed spacer 1 5.8S ribosomal RNA gene and internal transcribed spacer 2 complete sequence and large subunit ribosomal RNA gene partial sequence	0.0221253	0.00719082
MH134138.1 Aquilaria beccariana internal transcribed spacer 1 partial sequence 5.8S ribosomal RNA gene complete sequence and internal transcribed spacer 2 partial sequence_{aga}	KY817961.1 Aquilaria crassna voucher CS-10 small subunit ribosomal RNA gene partial sequence internal transcribed spacer 1 5.8S ribosomal RNA gene and internal transcribed spacer 2 complete sequence and large subunit ribosomal RNA gene partial sequence	0.0220708	0.00727399
KT779116.1 Aquilaria beccariana voucher FBL04001 internal transcribed spacer 1 partial sequence 5.8S ribosomal RNA gene complete sequence and internal transcribed spacer 2 partial sequence_{aga}	KY817961.1 Aquilaria crassna voucher CS-10 small subunit ribosomal RNA gene partial sequence internal transcribed spacer 1 5.8S ribosomal RNA gene and internal transcribed spacer 2 complete sequence and large subunit ribosomal RNA gene partial sequence	0.0421308	0.0101917
KT364477.1 Aquilaria beccariana voucher SFN29381 internal transcribed spacer 1 partial sequence 5.8S ribosomal RNA gene complete sequence and internal transcribed spacer 2 partial sequence_{aga}	KY817961.1 Aquilaria crassna voucher CS-10 small subunit ribosomal RNA gene partial sequence internal transcribed spacer 1 5.8S ribosomal RNA gene and internal transcribed spacer 2 complete sequence and large subunit ribosomal RNA gene partial sequence	0.0221534	0.00722737
KX351419.1 Aquilaria beccariana voucher S1 5.8S ribosomal RNA gene partial sequence internal transcribed spacer 2 complete sequence and large subunit ribosomal RNA gene partial sequence_{aga}	KY817961.1 Aquilaria crassna voucher CS-10 small subunit ribosomal RNA gene partial sequence internal transcribed spacer 1 5.8S ribosomal RNA gene and internal transcribed spacer 2 complete sequence and large subunit ribosomal RNA gene partial sequence	0	0
KX424704.1 Aquilaria beccariana 5.8S ribosomal RNA gene partial sequence internal transcribed spacer 2 complete sequence and 28S ribosomal RNA gene partial sequence_{aga}	KY817961.1 Aquilaria crassna voucher CS-10 small subunit ribosomal RNA gene partial sequence internal transcribed spacer 1 5.8S ribosomal RNA gene and internal transcribed spacer 2 complete sequence and large subunit ribosomal RNA gene partial sequence	0.0438711	0.011062
KU238038.1 Aquilaria crassna voucher FBL G11 WC3 internal transcribed spacer 2 partial sequence	KY817961.1 Aquilaria crassna voucher CS-10 small subunit ribosomal RNA gene partial sequence internal transcribed spacer 1 5.8S ribosomal RNA gene and internal transcribed spacer 2 complete sequence and large subunit ribosomal RNA gene partial sequence	0	0
MH134139.1 Aquilaria crassna internal transcribed spacer 1 partial sequence 5.8S ribosomal RNA gene complete sequence and internal transcribed spacer 2 partial sequence	KY817961.1 Aquilaria crassna voucher CS-10 small subunit ribosomal RNA gene partial sequence internal transcribed spacer 1 5.8S ribosomal RNA gene and internal transcribed spacer 2 complete sequence and large subunit ribosomal RNA gene partial sequence	0	0
KU244111.1 Aquilaria crassna voucher FBL01017 internal transcribed spacer 2 partial sequence	KY817961.1 Aquilaria crassna voucher CS-10 small subunit ribosomal RNA gene partial sequence internal transcribed spacer 1 5.8S ribosomal RNA gene and internal transcribed spacer 2 complete sequence and large subunit ribosomal RNA gene partial sequence	0	0
KU244110.1 Aquilaria crassna voucher FBL01014 internal transcribed spacer 2 partial sequence	KY817961.1 Aquilaria crassna voucher CS-10 small subunit ribosomal RNA gene partial sequence internal transcribed spacer 1 5.8S ribosomal RNA gene and internal transcribed spacer 2 complete sequence and large subunit ribosomal RNA gene partial sequence	0	0
KU244109.1 Aquilaria crassna voucher FBL01013 internal transcribed spacer 2 partial sequence	KY817961.1 Aquilaria crassna voucher CS-10 small subunit ribosomal RNA gene partial sequence internal transcribed spacer 1 5.8S ribosomal RNA gene and internal transcribed spacer 2 complete sequence and large subunit ribosomal RNA gene partial sequence	0	0
KU244108.1 Aquilaria crassna voucher FBL01012 internal transcribed spacer 2 partial sequence	KY817961.1 Aquilaria crassna voucher CS-10 small subunit ribosomal RNA gene partial sequence internal transcribed spacer 1 5.8S ribosomal RNA gene and internal transcribed spacer 2 complete sequence and large subunit ribosomal RNA gene partial sequence	0	0
KU238037.1 Aquilaria crassna voucher FBL G10 WC2 internal transcribed spacer 2 partial sequence	KY817961.1 Aquilaria crassna voucher CS-10 small subunit ribosomal RNA gene partial sequence internal transcribed spacer 1 5.8S ribosomal RNA gene and internal transcribed spacer 2 complete sequence and large subunit ribosomal RNA gene partial sequence	0.0027248	0.00273681
KU238035.1 Aquilaria crassna voucher FBL G04 WC1 internal transcribed spacer 2 partial sequence	KY817961.1 Aquilaria crassna voucher CS-10 small subunit ribosomal RNA gene partial sequence internal transcribed spacer 1 5.8S ribosomal RNA gene and internal transcribed spacer 2 complete sequence and large subunit ribosomal RNA gene partial sequence	0.0027248	0.00273681
KU244085.1 Aquilaria crassna voucher FBL01017 internal transcribed spacer 1 partial sequence 5.8S ribosomal RNA gene complete sequence and internal transcribed spacer 2 partial sequence	KY817961.1 Aquilaria crassna voucher CS-10 small subunit ribosomal RNA gene partial sequence internal transcribed spacer 1 5.8S ribosomal RNA gene and internal transcribed spacer 2 complete sequence and large subunit ribosomal RNA gene partial sequence	0	0
KU244084.1 Aquilaria crassna voucher FBL01014 internal transcribed spacer 1 partial sequence 5.8S ribosomal RNA gene complete sequence and internal transcribed spacer 2 partial sequence	KY817961.1 Aquilaria crassna voucher CS-10 small subunit ribosomal RNA gene partial sequence internal transcribed spacer 1 5.8S ribosomal RNA gene and internal transcribed spacer 2 complete sequence and large subunit ribosomal RNA gene partial sequence	0	0
KU244083.1 Aquilaria crassna voucher FBL01013 internal transcribed spacer 1 partial sequence 5.8S ribosomal RNA gene complete sequence and internal transcribed spacer 2 partial sequence_{cra}	KY817961.1 Aquilaria crassna voucher CS-10 small subunit ribosomal RNA gene partial sequence internal transcribed spacer 1 5.8S ribosomal RNA gene and internal transcribed spacer 2 complete sequence and large subunit ribosomal RNA gene partial sequence	0	0
KU244082.1 Aquilaria crassna voucher FBL01012 internal transcribed spacer 1 partial sequence 5.8S ribosomal RNA gene complete sequence and internal transcribed spacer 2 partial sequence	KY817961.1 Aquilaria crassna voucher CS-10 small subunit ribosomal RNA gene partial sequence internal transcribed spacer 1 5.8S ribosomal RNA gene and internal transcribed spacer 2 complete sequence and large subunit ribosomal RNA gene partial sequence	0	0
KT364478.1 Aquilaria crassna voucher FBL01012 internal transcribed spacer 1 partial sequence 5.8S ribosomal RNA gene complete sequence and internal transcribed spacer 2 partial sequence	KY817961.1 Aquilaria crassna voucher CS-10 small subunit ribosomal RNA gene partial sequence internal transcribed spacer 1 5.8S ribosomal RNA gene and internal transcribed spacer 2 complete sequence and large subunit ribosomal RNA gene partial sequence	0	0
KY817982.1 Aquilaria crassna voucher S-9 small subunit ribosomal RNA gene partial sequence internal transcribed spacer 1 5.8S ribosomal RNA gene and internal transcribed spacer 2 complete sequence and large subunit ribosomal RNA gene partial sequence	KY817961.1 Aquilaria crassna voucher CS-10 small subunit ribosomal RNA gene partial sequence internal transcribed spacer 1 5.8S ribosomal RNA gene and internal transcribed spacer 2 complete sequence and large subunit ribosomal RNA gene partial sequence	0	0
KY817979.1 Aquilaria crassna voucher S-1 small subunit ribosomal RNA gene partial sequence internal transcribed spacer 1 5.8S ribosomal RNA gene and internal transcribed spacer 2 complete sequence and large subunit ribosomal RNA gene partial sequence	KY817961.1 Aquilaria crassna voucher CS-10 small subunit ribosomal RNA gene partial sequence internal transcribed spacer 1 5.8S ribosomal RNA gene and internal transcribed spacer 2 complete sequence and large subunit ribosomal RNA gene partial sequence	0	0
KY817973.1 Aquilaria crassna voucher ML-9 small subunit ribosomal RNA gene partial sequence internal transcribed spacer 1 5.8S ribosomal RNA gene and internal transcribed spacer 2 complete sequence and large subunit ribosomal RNA gene partial sequence	KY817961.1 Aquilaria crassna voucher CS-10 small subunit ribosomal RNA gene partial sequence internal transcribed spacer 1 5.8S ribosomal RNA gene and internal transcribed spacer 2 complete sequence and large subunit ribosomal RNA gene partial sequence	0	0
KY817972.1 Aquilaria crassna voucher ML-8 small subunit ribosomal RNA gene partial sequence internal transcribed spacer 1 5.8S ribosomal RNA gene and internal transcribed spacer 2 complete sequence and large subunit ribosomal RNA gene partial sequence	KY817961.1 Aquilaria crassna voucher CS-10 small subunit ribosomal RNA gene partial sequence internal transcribed spacer 1 5.8S ribosomal RNA gene and internal transcribed spacer 2 complete sequence and large subunit ribosomal RNA gene partial sequence	0	0
KY817971.1 Aquilaria crassna voucher ML-7 small subunit ribosomal RNA gene partial sequence internal transcribed spacer 1 5.8S ribosomal RNA gene and internal transcribed spacer 2 complete sequence and large subunit ribosomal RNA gene partial sequence	KY817961.1 Aquilaria crassna voucher CS-10 small subunit ribosomal RNA gene partial sequence internal transcribed spacer 1 5.8S ribosomal RNA gene and internal transcribed spacer 2 complete sequence and large subunit ribosomal RNA gene partial sequence	0	0
KY817970.1 Aquilaria crassna voucher ML-6 small subunit ribosomal RNA gene partial sequence internal transcribed spacer 1 5.8S ribosomal RNA gene and internal transcribed spacer 2 complete sequence and large subunit ribosomal RNA gene partial sequence	KY817961.1 Aquilaria crassna voucher CS-10 small subunit ribosomal RNA gene partial sequence internal transcribed spacer 1 5.8S ribosomal RNA gene and internal transcribed spacer 2 complete sequence and large subunit ribosomal RNA gene partial sequence	0	0
KY817969.1 Aquilaria crassna voucher ML-5 small subunit ribosomal RNA gene partial sequence internal transcribed spacer 1 5.8S ribosomal RNA gene and internal transcribed spacer 2 complete sequence and large subunit ribosomal RNA gene partial sequence	KY817961.1 Aquilaria crassna voucher CS-10 small subunit ribosomal RNA gene partial sequence internal transcribed spacer 1 5.8S ribosomal RNA gene and internal transcribed spacer 2 complete sequence and large subunit ribosomal RNA gene partial sequence	0	0
KY817968.1 Aquilaria crassna voucher ML-4 small subunit ribosomal RNA gene partial sequence internal transcribed spacer 1 5.8S ribosomal RNA gene and internal transcribed spacer 2 complete sequence and large subunit ribosomal RNA gene partial sequence	KY817961.1 Aquilaria crassna voucher CS-10 small subunit ribosomal RNA gene partial sequence internal transcribed spacer 1 5.8S ribosomal RNA gene and internal transcribed spacer 2 complete sequence and large subunit ribosomal RNA gene partial sequence	0	0
KY817967.1 Aquilaria crassna voucher ML-3 small subunit ribosomal RNA gene partial sequence internal transcribed spacer 1 5.8S ribosomal RNA gene and internal transcribed spacer 2 complete sequence and large subunit ribosomal RNA gene partial sequence	KY817961.1 Aquilaria crassna voucher CS-10 small subunit ribosomal RNA gene partial sequence internal transcribed spacer 1 5.8S ribosomal RNA gene and internal transcribed spacer 2 complete sequence and large subunit ribosomal RNA gene partial sequence	0	0
KY817964.1 Aquilaria crassna voucher CS-13 small subunit ribosomal RNA gene partial sequence internal transcribed spacer 1 5.8S ribosomal RNA gene and internal transcribed spacer 2 complete sequence and large subunit ribosomal RNA gene partial sequence	KY817961.1 Aquilaria crassna voucher CS-10 small subunit ribosomal RNA gene partial sequence internal transcribed spacer 1 5.8S ribosomal RNA gene and internal transcribed spacer 2 complete sequence and large subunit ribosomal RNA gene partial sequence	0	0
KY817963.1 Aquilaria crassna voucher CS-12 small subunit ribosomal RNA gene partial sequence internal transcribed spacer 1 5.8S ribosomal RNA gene and internal transcribed spacer 2 complete sequence and large subunit ribosomal RNA gene partial sequence	KY817961.1 Aquilaria crassna voucher CS-10 small subunit ribosomal RNA gene partial sequence internal transcribed spacer 1 5.8S ribosomal RNA gene and internal transcribed spacer 2 complete sequence and large subunit ribosomal RNA gene partial sequence	0	0
KY817962.1 Aquilaria crassna voucher CS-11 small subunit ribosomal RNA gene partial sequence internal transcribed spacer 1 5.8S ribosomal RNA gene and internal transcribed spacer 2 complete sequence and large subunit ribosomal RNA gene partial sequence	KY817961.1 Aquilaria crassna voucher CS-10 small subunit ribosomal RNA gene partial sequence internal transcribed spacer 1 5.8S ribosomal RNA gene and internal transcribed spacer 2 complete sequence and large subunit ribosomal RNA gene partial sequence	0	0
MH134137.1 Aquilaria agallochum internal transcribed spacer 1 partial sequence 5.8S ribosomal RNA gene complete sequence and internal transcribed spacer 2 partial sequence_{aga}	KY817959.1 Aquilaria crassna voucher CS-8 small subunit ribosomal RNA gene partial sequence internal transcribed spacer 1 5.8S ribosomal RNA gene and internal transcribed spacer 2 complete sequence and large subunit ribosomal RNA gene partial sequence	0.0165072	0.0059524
KU879012.1 Aquilaria agallochum 18S ribosomal RNA gene partial sequence internal transcribed spacer 1 5.8S ribosomal RNA gene and internal transcribed spacer 2 complete sequence and 28S ribosomal RNA gene partial sequence_{aga}	KY817959.1 Aquilaria crassna voucher CS-8 small subunit ribosomal RNA gene partial sequence internal transcribed spacer 1 5.8S ribosomal RNA gene and internal transcribed spacer 2 complete sequence and large subunit ribosomal RNA gene partial sequence	0.0221253	0.00719082
MH134138.1 Aquilaria beccariana internal transcribed spacer 1 partial sequence 5.8S ribosomal RNA gene complete sequence and internal transcribed spacer 2 partial sequence_{aga}	KY817959.1 Aquilaria crassna voucher CS-8 small subunit ribosomal RNA gene partial sequence internal transcribed spacer 1 5.8S ribosomal RNA gene and internal transcribed spacer 2 complete sequence and large subunit ribosomal RNA gene partial sequence	0.0220708	0.00727399
KT779116.1 Aquilaria beccariana voucher FBL04001 internal transcribed spacer 1 partial sequence 5.8S ribosomal RNA gene complete sequence and internal transcribed spacer 2 partial sequence_{aga}	KY817959.1 Aquilaria crassna voucher CS-8 small subunit ribosomal RNA gene partial sequence internal transcribed spacer 1 5.8S ribosomal RNA gene and internal transcribed spacer 2 complete sequence and large subunit ribosomal RNA gene partial sequence	0.0421308	0.0101917
KT364477.1 Aquilaria beccariana voucher SFN29381 internal transcribed spacer 1 partial sequence 5.8S ribosomal RNA gene complete sequence and internal transcribed spacer 2 partial sequence_{aga}	KY817959.1 Aquilaria crassna voucher CS-8 small subunit ribosomal RNA gene partial sequence internal transcribed spacer 1 5.8S ribosomal RNA gene and internal transcribed spacer 2 complete sequence and large subunit ribosomal RNA gene partial sequence	0.0221534	0.00722737
KX351419.1 Aquilaria beccariana voucher S1 5.8S ribosomal RNA gene partial sequence internal transcribed spacer 2 complete sequence and large subunit ribosomal RNA gene partial sequence_{aga}	KY817959.1 Aquilaria crassna voucher CS-8 small subunit ribosomal RNA gene partial sequence internal transcribed spacer 1 5.8S ribosomal RNA gene and internal transcribed spacer 2 complete sequence and large subunit ribosomal RNA gene partial sequence	0	0
KX424704.1 Aquilaria beccariana 5.8S ribosomal RNA gene partial sequence internal transcribed spacer 2 complete sequence and 28S ribosomal RNA gene partial sequence_{aga}	KY817959.1 Aquilaria crassna voucher CS-8 small subunit ribosomal RNA gene partial sequence internal transcribed spacer 1 5.8S ribosomal RNA gene and internal transcribed spacer 2 complete sequence and large subunit ribosomal RNA gene partial sequence	0.0438711	0.011062
KU238038.1 Aquilaria crassna voucher FBL G11 WC3 internal transcribed spacer 2 partial sequence	KY817959.1 Aquilaria crassna voucher CS-8 small subunit ribosomal RNA gene partial sequence internal transcribed spacer 1 5.8S ribosomal RNA gene and internal transcribed spacer 2 complete sequence and large subunit ribosomal RNA gene partial sequence	0	0
MH134139.1 Aquilaria crassna internal transcribed spacer 1 partial sequence 5.8S ribosomal RNA gene complete sequence and internal transcribed spacer 2 partial sequence	KY817959.1 Aquilaria crassna voucher CS-8 small subunit ribosomal RNA gene partial sequence internal transcribed spacer 1 5.8S ribosomal RNA gene and internal transcribed spacer 2 complete sequence and large subunit ribosomal RNA gene partial sequence	0	0
KU244111.1 Aquilaria crassna voucher FBL01017 internal transcribed spacer 2 partial sequence	KY817959.1 Aquilaria crassna voucher CS-8 small subunit ribosomal RNA gene partial sequence internal transcribed spacer 1 5.8S ribosomal RNA gene and internal transcribed spacer 2 complete sequence and large subunit ribosomal RNA gene partial sequence	0	0
KU244110.1 Aquilaria crassna voucher FBL01014 internal transcribed spacer 2 partial sequence	KY817959.1 Aquilaria crassna voucher CS-8 small subunit ribosomal RNA gene partial sequence internal transcribed spacer 1 5.8S ribosomal RNA gene and internal transcribed spacer 2 complete sequence and large subunit ribosomal RNA gene partial sequence	0	0
KU244109.1 Aquilaria crassna voucher FBL01013 internal transcribed spacer 2 partial sequence	KY817959.1 Aquilaria crassna voucher CS-8 small subunit ribosomal RNA gene partial sequence internal transcribed spacer 1 5.8S ribosomal RNA gene and internal transcribed spacer 2 complete sequence and large subunit ribosomal RNA gene partial sequence	0	0
KU244108.1 Aquilaria crassna voucher FBL01012 internal transcribed spacer 2 partial sequence	KY817959.1 Aquilaria crassna voucher CS-8 small subunit ribosomal RNA gene partial sequence internal transcribed spacer 1 5.8S ribosomal RNA gene and internal transcribed spacer 2 complete sequence and large subunit ribosomal RNA gene partial sequence	0	0
KU238037.1 Aquilaria crassna voucher FBL G10 WC2 internal transcribed spacer 2 partial sequence	KY817959.1 Aquilaria crassna voucher CS-8 small subunit ribosomal RNA gene partial sequence internal transcribed spacer 1 5.8S ribosomal RNA gene and internal transcribed spacer 2 complete sequence and large subunit ribosomal RNA gene partial sequence	0.0027248	0.00273681
KU238035.1 Aquilaria crassna voucher FBL G04 WC1 internal transcribed spacer 2 partial sequence	KY817959.1 Aquilaria crassna voucher CS-8 small subunit ribosomal RNA gene partial sequence internal transcribed spacer 1 5.8S ribosomal RNA gene and internal transcribed spacer 2 complete sequence and large subunit ribosomal RNA gene partial sequence	0.0027248	0.00273681
KU244085.1 Aquilaria crassna voucher FBL01017 internal transcribed spacer 1 partial sequence 5.8S ribosomal RNA gene complete sequence and internal transcribed spacer 2 partial sequence	KY817959.1 Aquilaria crassna voucher CS-8 small subunit ribosomal RNA gene partial sequence internal transcribed spacer 1 5.8S ribosomal RNA gene and internal transcribed spacer 2 complete sequence and large subunit ribosomal RNA gene partial sequence	0	0
KU244084.1 Aquilaria crassna voucher FBL01014 internal transcribed spacer 1 partial sequence 5.8S ribosomal RNA gene complete sequence and internal transcribed spacer 2 partial sequence	KY817959.1 Aquilaria crassna voucher CS-8 small subunit ribosomal RNA gene partial sequence internal transcribed spacer 1 5.8S ribosomal RNA gene and internal transcribed spacer 2 complete sequence and large subunit ribosomal RNA gene partial sequence	0	0
KU244083.1 Aquilaria crassna voucher FBL01013 internal transcribed spacer 1 partial sequence 5.8S ribosomal RNA gene complete sequence and internal transcribed spacer 2 partial sequence_{cra}	KY817959.1 Aquilaria crassna voucher CS-8 small subunit ribosomal RNA gene partial sequence internal transcribed spacer 1 5.8S ribosomal RNA gene and internal transcribed spacer 2 complete sequence and large subunit ribosomal RNA gene partial sequence	0	0
KU244082.1 Aquilaria crassna voucher FBL01012 internal transcribed spacer 1 partial sequence 5.8S ribosomal RNA gene complete sequence and internal transcribed spacer 2 partial sequence	KY817959.1 Aquilaria crassna voucher CS-8 small subunit ribosomal RNA gene partial sequence internal transcribed spacer 1 5.8S ribosomal RNA gene and internal transcribed spacer 2 complete sequence and large subunit ribosomal RNA gene partial sequence	0	0
KT364478.1 Aquilaria crassna voucher FBL01012 internal transcribed spacer 1 partial sequence 5.8S ribosomal RNA gene complete sequence and internal transcribed spacer 2 partial sequence	KY817959.1 Aquilaria crassna voucher CS-8 small subunit ribosomal RNA gene partial sequence internal transcribed spacer 1 5.8S ribosomal RNA gene and internal transcribed spacer 2 complete sequence and large subunit ribosomal RNA gene partial sequence	0	0
KY817982.1 Aquilaria crassna voucher S-9 small subunit ribosomal RNA gene partial sequence internal transcribed spacer 1 5.8S ribosomal RNA gene and internal transcribed spacer 2 complete sequence and large subunit ribosomal RNA gene partial sequence	KY817959.1 Aquilaria crassna voucher CS-8 small subunit ribosomal RNA gene partial sequence internal transcribed spacer 1 5.8S ribosomal RNA gene and internal transcribed spacer 2 complete sequence and large subunit ribosomal RNA gene partial sequence	0	0
KY817979.1 Aquilaria crassna voucher S-1 small subunit ribosomal RNA gene partial sequence internal transcribed spacer 1 5.8S ribosomal RNA gene and internal transcribed spacer 2 complete sequence and large subunit ribosomal RNA gene partial sequence	KY817959.1 Aquilaria crassna voucher CS-8 small subunit ribosomal RNA gene partial sequence internal transcribed spacer 1 5.8S ribosomal RNA gene and internal transcribed spacer 2 complete sequence and large subunit ribosomal RNA gene partial sequence	0	0
KY817973.1 Aquilaria crassna voucher ML-9 small subunit ribosomal RNA gene partial sequence internal transcribed spacer 1 5.8S ribosomal RNA gene and internal transcribed spacer 2 complete sequence and large subunit ribosomal RNA gene partial sequence	KY817959.1 Aquilaria crassna voucher CS-8 small subunit ribosomal RNA gene partial sequence internal transcribed spacer 1 5.8S ribosomal RNA gene and internal transcribed spacer 2 complete sequence and large subunit ribosomal RNA gene partial sequence	0	0
KY817972.1 Aquilaria crassna voucher ML-8 small subunit ribosomal RNA gene partial sequence internal transcribed spacer 1 5.8S ribosomal RNA gene and internal transcribed spacer 2 complete sequence and large subunit ribosomal RNA gene partial sequence	KY817959.1 Aquilaria crassna voucher CS-8 small subunit ribosomal RNA gene partial sequence internal transcribed spacer 1 5.8S ribosomal RNA gene and internal transcribed spacer 2 complete sequence and large subunit ribosomal RNA gene partial sequence	0	0
KY817971.1 Aquilaria crassna voucher ML-7 small subunit ribosomal RNA gene partial sequence internal transcribed spacer 1 5.8S ribosomal RNA gene and internal transcribed spacer 2 complete sequence and large subunit ribosomal RNA gene partial sequence	KY817959.1 Aquilaria crassna voucher CS-8 small subunit ribosomal RNA gene partial sequence internal transcribed spacer 1 5.8S ribosomal RNA gene and internal transcribed spacer 2 complete sequence and large subunit ribosomal RNA gene partial sequence	0	0
KY817970.1 Aquilaria crassna voucher ML-6 small subunit ribosomal RNA gene partial sequence internal transcribed spacer 1 5.8S ribosomal RNA gene and internal transcribed spacer 2 complete sequence and large subunit ribosomal RNA gene partial sequence	KY817959.1 Aquilaria crassna voucher CS-8 small subunit ribosomal RNA gene partial sequence internal transcribed spacer 1 5.8S ribosomal RNA gene and internal transcribed spacer 2 complete sequence and large subunit ribosomal RNA gene partial sequence	0	0
KY817969.1 Aquilaria crassna voucher ML-5 small subunit ribosomal RNA gene partial sequence internal transcribed spacer 1 5.8S ribosomal RNA gene and internal transcribed spacer 2 complete sequence and large subunit ribosomal RNA gene partial sequence	KY817959.1 Aquilaria crassna voucher CS-8 small subunit ribosomal RNA gene partial sequence internal transcribed spacer 1 5.8S ribosomal RNA gene and internal transcribed spacer 2 complete sequence and large subunit ribosomal RNA gene partial sequence	0	0
KY817968.1 Aquilaria crassna voucher ML-4 small subunit ribosomal RNA gene partial sequence internal transcribed spacer 1 5.8S ribosomal RNA gene and internal transcribed spacer 2 complete sequence and large subunit ribosomal RNA gene partial sequence	KY817959.1 Aquilaria crassna voucher CS-8 small subunit ribosomal RNA gene partial sequence internal transcribed spacer 1 5.8S ribosomal RNA gene and internal transcribed spacer 2 complete sequence and large subunit ribosomal RNA gene partial sequence	0	0
KY817967.1 Aquilaria crassna voucher ML-3 small subunit ribosomal RNA gene partial sequence internal transcribed spacer 1 5.8S ribosomal RNA gene and internal transcribed spacer 2 complete sequence and large subunit ribosomal RNA gene partial sequence	KY817959.1 Aquilaria crassna voucher CS-8 small subunit ribosomal RNA gene partial sequence internal transcribed spacer 1 5.8S ribosomal RNA gene and internal transcribed spacer 2 complete sequence and large subunit ribosomal RNA gene partial sequence	0	0
KY817964.1 Aquilaria crassna voucher CS-13 small subunit ribosomal RNA gene partial sequence internal transcribed spacer 1 5.8S ribosomal RNA gene and internal transcribed spacer 2 complete sequence and large subunit ribosomal RNA gene partial sequence	KY817959.1 Aquilaria crassna voucher CS-8 small subunit ribosomal RNA gene partial sequence internal transcribed spacer 1 5.8S ribosomal RNA gene and internal transcribed spacer 2 complete sequence and large subunit ribosomal RNA gene partial sequence	0	0
KY817963.1 Aquilaria crassna voucher CS-12 small subunit ribosomal RNA gene partial sequence internal transcribed spacer 1 5.8S ribosomal RNA gene and internal transcribed spacer 2 complete sequence and large subunit ribosomal RNA gene partial sequence	KY817959.1 Aquilaria crassna voucher CS-8 small subunit ribosomal RNA gene partial sequence internal transcribed spacer 1 5.8S ribosomal RNA gene and internal transcribed spacer 2 complete sequence and large subunit ribosomal RNA gene partial sequence	0	0
KY817962.1 Aquilaria crassna voucher CS-11 small subunit ribosomal RNA gene partial sequence internal transcribed spacer 1 5.8S ribosomal RNA gene and internal transcribed spacer 2 complete sequence and large subunit ribosomal RNA gene partial sequence	KY817959.1 Aquilaria crassna voucher CS-8 small subunit ribosomal RNA gene partial sequence internal transcribed spacer 1 5.8S ribosomal RNA gene and internal transcribed spacer 2 complete sequence and large subunit ribosomal RNA gene partial sequence	0	0
KY817961.1 Aquilaria crassna voucher CS-10 small subunit ribosomal RNA gene partial sequence internal transcribed spacer 1 5.8S ribosomal RNA gene and internal transcribed spacer 2 complete sequence and large subunit ribosomal RNA gene partial sequence	KY817959.1 Aquilaria crassna voucher CS-8 small subunit ribosomal RNA gene partial sequence internal transcribed spacer 1 5.8S ribosomal RNA gene and internal transcribed spacer 2 complete sequence and large subunit ribosomal RNA gene partial sequence	0	0
MH134137.1 Aquilaria agallochum internal transcribed spacer 1 partial sequence 5.8S ribosomal RNA gene complete sequence and internal transcribed spacer 2 partial sequence_{aga}	KY817958.1 Aquilaria crassna voucher CS-7 small subunit ribosomal RNA gene partial sequence internal transcribed spacer 1 5.8S ribosomal RNA gene and internal transcribed spacer 2 complete sequence and large subunit ribosomal RNA gene partial sequence	0.0165072	0.0059524
KU879012.1 Aquilaria agallochum 18S ribosomal RNA gene partial sequence internal transcribed spacer 1 5.8S ribosomal RNA gene and internal transcribed spacer 2 complete sequence and 28S ribosomal RNA gene partial sequence_{aga}	KY817958.1 Aquilaria crassna voucher CS-7 small subunit ribosomal RNA gene partial sequence internal transcribed spacer 1 5.8S ribosomal RNA gene and internal transcribed spacer 2 complete sequence and large subunit ribosomal RNA gene partial sequence	0.0221253	0.00719082
MH134138.1 Aquilaria beccariana internal transcribed spacer 1 partial sequence 5.8S ribosomal RNA gene complete sequence and internal transcribed spacer 2 partial sequence_{aga}	KY817958.1 Aquilaria crassna voucher CS-7 small subunit ribosomal RNA gene partial sequence internal transcribed spacer 1 5.8S ribosomal RNA gene and internal transcribed spacer 2 complete sequence and large subunit ribosomal RNA gene partial sequence	0.0220708	0.00727399
KT779116.1 Aquilaria beccariana voucher FBL04001 internal transcribed spacer 1 partial sequence 5.8S ribosomal RNA gene complete sequence and internal transcribed spacer 2 partial sequence_{aga}	KY817958.1 Aquilaria crassna voucher CS-7 small subunit ribosomal RNA gene partial sequence internal transcribed spacer 1 5.8S ribosomal RNA gene and internal transcribed spacer 2 complete sequence and large subunit ribosomal RNA gene partial sequence	0.0421308	0.0101917
KT364477.1 Aquilaria beccariana voucher SFN29381 internal transcribed spacer 1 partial sequence 5.8S ribosomal RNA gene complete sequence and internal transcribed spacer 2 partial sequence_{aga}	KY817958.1 Aquilaria crassna voucher CS-7 small subunit ribosomal RNA gene partial sequence internal transcribed spacer 1 5.8S ribosomal RNA gene and internal transcribed spacer 2 complete sequence and large subunit ribosomal RNA gene partial sequence	0.0221534	0.00722737
KX351419.1 Aquilaria beccariana voucher S1 5.8S ribosomal RNA gene partial sequence internal transcribed spacer 2 complete sequence and large subunit ribosomal RNA gene partial sequence_{aga}	KY817958.1 Aquilaria crassna voucher CS-7 small subunit ribosomal RNA gene partial sequence internal transcribed spacer 1 5.8S ribosomal RNA gene and internal transcribed spacer 2 complete sequence and large subunit ribosomal RNA gene partial sequence	0	0
KX424704.1 Aquilaria beccariana 5.8S ribosomal RNA gene partial sequence internal transcribed spacer 2 complete sequence and 28S ribosomal RNA gene partial sequence_{aga}	KY817958.1 Aquilaria crassna voucher CS-7 small subunit ribosomal RNA gene partial sequence internal transcribed spacer 1 5.8S ribosomal RNA gene and internal transcribed spacer 2 complete sequence and large subunit ribosomal RNA gene partial sequence	0.0438711	0.011062
KU238038.1 Aquilaria crassna voucher FBL G11 WC3 internal transcribed spacer 2 partial sequence	KY817958.1 Aquilaria crassna voucher CS-7 small subunit ribosomal RNA gene partial sequence internal transcribed spacer 1 5.8S ribosomal RNA gene and internal transcribed spacer 2 complete sequence and large subunit ribosomal RNA gene partial sequence	0	0
MH134139.1 Aquilaria crassna internal transcribed spacer 1 partial sequence 5.8S ribosomal RNA gene complete sequence and internal transcribed spacer 2 partial sequence	KY817958.1 Aquilaria crassna voucher CS-7 small subunit ribosomal RNA gene partial sequence internal transcribed spacer 1 5.8S ribosomal RNA gene and internal transcribed spacer 2 complete sequence and large subunit ribosomal RNA gene partial sequence	0	0
KU244111.1 Aquilaria crassna voucher FBL01017 internal transcribed spacer 2 partial sequence	KY817958.1 Aquilaria crassna voucher CS-7 small subunit ribosomal RNA gene partial sequence internal transcribed spacer 1 5.8S ribosomal RNA gene and internal transcribed spacer 2 complete sequence and large subunit ribosomal RNA gene partial sequence	0	0
KU244110.1 Aquilaria crassna voucher FBL01014 internal transcribed spacer 2 partial sequence	KY817958.1 Aquilaria crassna voucher CS-7 small subunit ribosomal RNA gene partial sequence internal transcribed spacer 1 5.8S ribosomal RNA gene and internal transcribed spacer 2 complete sequence and large subunit ribosomal RNA gene partial sequence	0	0
KU244109.1 Aquilaria crassna voucher FBL01013 internal transcribed spacer 2 partial sequence	KY817958.1 Aquilaria crassna voucher CS-7 small subunit ribosomal RNA gene partial sequence internal transcribed spacer 1 5.8S ribosomal RNA gene and internal transcribed spacer 2 complete sequence and large subunit ribosomal RNA gene partial sequence	0	0
KU244108.1 Aquilaria crassna voucher FBL01012 internal transcribed spacer 2 partial sequence	KY817958.1 Aquilaria crassna voucher CS-7 small subunit ribosomal RNA gene partial sequence internal transcribed spacer 1 5.8S ribosomal RNA gene and internal transcribed spacer 2 complete sequence and large subunit ribosomal RNA gene partial sequence	0	0
KU238037.1 Aquilaria crassna voucher FBL G10 WC2 internal transcribed spacer 2 partial sequence	KY817958.1 Aquilaria crassna voucher CS-7 small subunit ribosomal RNA gene partial sequence internal transcribed spacer 1 5.8S ribosomal RNA gene and internal transcribed spacer 2 complete sequence and large subunit ribosomal RNA gene partial sequence	0.0027248	0.00273681
KU238035.1 Aquilaria crassna voucher FBL G04 WC1 internal transcribed spacer 2 partial sequence	KY817958.1 Aquilaria crassna voucher CS-7 small subunit ribosomal RNA gene partial sequence internal transcribed spacer 1 5.8S ribosomal RNA gene and internal transcribed spacer 2 complete sequence and large subunit ribosomal RNA gene partial sequence	0.0027248	0.00273681
KU244085.1 Aquilaria crassna voucher FBL01017 internal transcribed spacer 1 partial sequence 5.8S ribosomal RNA gene complete sequence and internal transcribed spacer 2 partial sequence	KY817958.1 Aquilaria crassna voucher CS-7 small subunit ribosomal RNA gene partial sequence internal transcribed spacer 1 5.8S ribosomal RNA gene and internal transcribed spacer 2 complete sequence and large subunit ribosomal RNA gene partial sequence	0	0
KU244084.1 Aquilaria crassna voucher FBL01014 internal transcribed spacer 1 partial sequence 5.8S ribosomal RNA gene complete sequence and internal transcribed spacer 2 partial sequence	KY817958.1 Aquilaria crassna voucher CS-7 small subunit ribosomal RNA gene partial sequence internal transcribed spacer 1 5.8S ribosomal RNA gene and internal transcribed spacer 2 complete sequence and large subunit ribosomal RNA gene partial sequence	0	0
KU244083.1 Aquilaria crassna voucher FBL01013 internal transcribed spacer 1 partial sequence 5.8S ribosomal RNA gene complete sequence and internal transcribed spacer 2 partial sequence_{cra}	KY817958.1 Aquilaria crassna voucher CS-7 small subunit ribosomal RNA gene partial sequence internal transcribed spacer 1 5.8S ribosomal RNA gene and internal transcribed spacer 2 complete sequence and large subunit ribosomal RNA gene partial sequence	0	0
KU244082.1 Aquilaria crassna voucher FBL01012 internal transcribed spacer 1 partial sequence 5.8S ribosomal RNA gene complete sequence and internal transcribed spacer 2 partial sequence	KY817958.1 Aquilaria crassna voucher CS-7 small subunit ribosomal RNA gene partial sequence internal transcribed spacer 1 5.8S ribosomal RNA gene and internal transcribed spacer 2 complete sequence and large subunit ribosomal RNA gene partial sequence	0	0
KT364478.1 Aquilaria crassna voucher FBL01012 internal transcribed spacer 1 partial sequence 5.8S ribosomal RNA gene complete sequence and internal transcribed spacer 2 partial sequence	KY817958.1 Aquilaria crassna voucher CS-7 small subunit ribosomal RNA gene partial sequence internal transcribed spacer 1 5.8S ribosomal RNA gene and internal transcribed spacer 2 complete sequence and large subunit ribosomal RNA gene partial sequence	0	0
KY817982.1 Aquilaria crassna voucher S-9 small subunit ribosomal RNA gene partial sequence internal transcribed spacer 1 5.8S ribosomal RNA gene and internal transcribed spacer 2 complete sequence and large subunit ribosomal RNA gene partial sequence	KY817958.1 Aquilaria crassna voucher CS-7 small subunit ribosomal RNA gene partial sequence internal transcribed spacer 1 5.8S ribosomal RNA gene and internal transcribed spacer 2 complete sequence and large subunit ribosomal RNA gene partial sequence	0	0
KY817979.1 Aquilaria crassna voucher S-1 small subunit ribosomal RNA gene partial sequence internal transcribed spacer 1 5.8S ribosomal RNA gene and internal transcribed spacer 2 complete sequence and large subunit ribosomal RNA gene partial sequence	KY817958.1 Aquilaria crassna voucher CS-7 small subunit ribosomal RNA gene partial sequence internal transcribed spacer 1 5.8S ribosomal RNA gene and internal transcribed spacer 2 complete sequence and large subunit ribosomal RNA gene partial sequence	0	0
KY817973.1 Aquilaria crassna voucher ML-9 small subunit ribosomal RNA gene partial sequence internal transcribed spacer 1 5.8S ribosomal RNA gene and internal transcribed spacer 2 complete sequence and large subunit ribosomal RNA gene partial sequence	KY817958.1 Aquilaria crassna voucher CS-7 small subunit ribosomal RNA gene partial sequence internal transcribed spacer 1 5.8S ribosomal RNA gene and internal transcribed spacer 2 complete sequence and large subunit ribosomal RNA gene partial sequence	0	0
KY817972.1 Aquilaria crassna voucher ML-8 small subunit ribosomal RNA gene partial sequence internal transcribed spacer 1 5.8S ribosomal RNA gene and internal transcribed spacer 2 complete sequence and large subunit ribosomal RNA gene partial sequence	KY817958.1 Aquilaria crassna voucher CS-7 small subunit ribosomal RNA gene partial sequence internal transcribed spacer 1 5.8S ribosomal RNA gene and internal transcribed spacer 2 complete sequence and large subunit ribosomal RNA gene partial sequence	0	0
KY817971.1 Aquilaria crassna voucher ML-7 small subunit ribosomal RNA gene partial sequence internal transcribed spacer 1 5.8S ribosomal RNA gene and internal transcribed spacer 2 complete sequence and large subunit ribosomal RNA gene partial sequence	KY817958.1 Aquilaria crassna voucher CS-7 small subunit ribosomal RNA gene partial sequence internal transcribed spacer 1 5.8S ribosomal RNA gene and internal transcribed spacer 2 complete sequence and large subunit ribosomal RNA gene partial sequence	0	0
KY817970.1 Aquilaria crassna voucher ML-6 small subunit ribosomal RNA gene partial sequence internal transcribed spacer 1 5.8S ribosomal RNA gene and internal transcribed spacer 2 complete sequence and large subunit ribosomal RNA gene partial sequence	KY817958.1 Aquilaria crassna voucher CS-7 small subunit ribosomal RNA gene partial sequence internal transcribed spacer 1 5.8S ribosomal RNA gene and internal transcribed spacer 2 complete sequence and large subunit ribosomal RNA gene partial sequence	0	0
KY817969.1 Aquilaria crassna voucher ML-5 small subunit ribosomal RNA gene partial sequence internal transcribed spacer 1 5.8S ribosomal RNA gene and internal transcribed spacer 2 complete sequence and large subunit ribosomal RNA gene partial sequence	KY817958.1 Aquilaria crassna voucher CS-7 small subunit ribosomal RNA gene partial sequence internal transcribed spacer 1 5.8S ribosomal RNA gene and internal transcribed spacer 2 complete sequence and large subunit ribosomal RNA gene partial sequence	0	0
KY817968.1 Aquilaria crassna voucher ML-4 small subunit ribosomal RNA gene partial sequence internal transcribed spacer 1 5.8S ribosomal RNA gene and internal transcribed spacer 2 complete sequence and large subunit ribosomal RNA gene partial sequence	KY817958.1 Aquilaria crassna voucher CS-7 small subunit ribosomal RNA gene partial sequence internal transcribed spacer 1 5.8S ribosomal RNA gene and internal transcribed spacer 2 complete sequence and large subunit ribosomal RNA gene partial sequence	0	0
KY817967.1 Aquilaria crassna voucher ML-3 small subunit ribosomal RNA gene partial sequence internal transcribed spacer 1 5.8S ribosomal RNA gene and internal transcribed spacer 2 complete sequence and large subunit ribosomal RNA gene partial sequence	KY817958.1 Aquilaria crassna voucher CS-7 small subunit ribosomal RNA gene partial sequence internal transcribed spacer 1 5.8S ribosomal RNA gene and internal transcribed spacer 2 complete sequence and large subunit ribosomal RNA gene partial sequence	0	0
KY817964.1 Aquilaria crassna voucher CS-13 small subunit ribosomal RNA gene partial sequence internal transcribed spacer 1 5.8S ribosomal RNA gene and internal transcribed spacer 2 complete sequence and large subunit ribosomal RNA gene partial sequence	KY817958.1 Aquilaria crassna voucher CS-7 small subunit ribosomal RNA gene partial sequence internal transcribed spacer 1 5.8S ribosomal RNA gene and internal transcribed spacer 2 complete sequence and large subunit ribosomal RNA gene partial sequence	0	0
KY817963.1 Aquilaria crassna voucher CS-12 small subunit ribosomal RNA gene partial sequence internal transcribed spacer 1 5.8S ribosomal RNA gene and internal transcribed spacer 2 complete sequence and large subunit ribosomal RNA gene partial sequence	KY817958.1 Aquilaria crassna voucher CS-7 small subunit ribosomal RNA gene partial sequence internal transcribed spacer 1 5.8S ribosomal RNA gene and internal transcribed spacer 2 complete sequence and large subunit ribosomal RNA gene partial sequence	0	0
KY817962.1 Aquilaria crassna voucher CS-11 small subunit ribosomal RNA gene partial sequence internal transcribed spacer 1 5.8S ribosomal RNA gene and internal transcribed spacer 2 complete sequence and large subunit ribosomal RNA gene partial sequence	KY817958.1 Aquilaria crassna voucher CS-7 small subunit ribosomal RNA gene partial sequence internal transcribed spacer 1 5.8S ribosomal RNA gene and internal transcribed spacer 2 complete sequence and large subunit ribosomal RNA gene partial sequence	0	0
KY817961.1 Aquilaria crassna voucher CS-10 small subunit ribosomal RNA gene partial sequence internal transcribed spacer 1 5.8S ribosomal RNA gene and internal transcribed spacer 2 complete sequence and large subunit ribosomal RNA gene partial sequence	KY817958.1 Aquilaria crassna voucher CS-7 small subunit ribosomal RNA gene partial sequence internal transcribed spacer 1 5.8S ribosomal RNA gene and internal transcribed spacer 2 complete sequence and large subunit ribosomal RNA gene partial sequence	0	0
KY817959.1 Aquilaria crassna voucher CS-8 small subunit ribosomal RNA gene partial sequence internal transcribed spacer 1 5.8S ribosomal RNA gene and internal transcribed spacer 2 complete sequence and large subunit ribosomal RNA gene partial sequence	KY817958.1 Aquilaria crassna voucher CS-7 small subunit ribosomal RNA gene partial sequence internal transcribed spacer 1 5.8S ribosomal RNA gene and internal transcribed spacer 2 complete sequence and large subunit ribosomal RNA gene partial sequence	0	0
MH134137.1 Aquilaria agallochum internal transcribed spacer 1 partial sequence 5.8S ribosomal RNA gene complete sequence and internal transcribed spacer 2 partial sequence_{aga}	KY817957.1 Aquilaria crassna voucher CS-6 small subunit ribosomal RNA gene partial sequence internal transcribed spacer 1 5.8S ribosomal RNA gene and internal transcribed spacer 2 complete sequence and large subunit ribosomal RNA gene partial sequence	0.0165072	0.0059524
KU879012.1 Aquilaria agallochum 18S ribosomal RNA gene partial sequence internal transcribed spacer 1 5.8S ribosomal RNA gene and internal transcribed spacer 2 complete sequence and 28S ribosomal RNA gene partial sequence_{aga}	KY817957.1 Aquilaria crassna voucher CS-6 small subunit ribosomal RNA gene partial sequence internal transcribed spacer 1 5.8S ribosomal RNA gene and internal transcribed spacer 2 complete sequence and large subunit ribosomal RNA gene partial sequence	0.0221253	0.00719082
MH134138.1 Aquilaria beccariana internal transcribed spacer 1 partial sequence 5.8S ribosomal RNA gene complete sequence and internal transcribed spacer 2 partial sequence_{aga}	KY817957.1 Aquilaria crassna voucher CS-6 small subunit ribosomal RNA gene partial sequence internal transcribed spacer 1 5.8S ribosomal RNA gene and internal transcribed spacer 2 complete sequence and large subunit ribosomal RNA gene partial sequence	0.0220708	0.00727399
KT779116.1 Aquilaria beccariana voucher FBL04001 internal transcribed spacer 1 partial sequence 5.8S ribosomal RNA gene complete sequence and internal transcribed spacer 2 partial sequence_{aga}	KY817957.1 Aquilaria crassna voucher CS-6 small subunit ribosomal RNA gene partial sequence internal transcribed spacer 1 5.8S ribosomal RNA gene and internal transcribed spacer 2 complete sequence and large subunit ribosomal RNA gene partial sequence	0.0421308	0.0101917
KT364477.1 Aquilaria beccariana voucher SFN29381 internal transcribed spacer 1 partial sequence 5.8S ribosomal RNA gene complete sequence and internal transcribed spacer 2 partial sequence_{aga}	KY817957.1 Aquilaria crassna voucher CS-6 small subunit ribosomal RNA gene partial sequence internal transcribed spacer 1 5.8S ribosomal RNA gene and internal transcribed spacer 2 complete sequence and large subunit ribosomal RNA gene partial sequence	0.0221534	0.00722737
KX351419.1 Aquilaria beccariana voucher S1 5.8S ribosomal RNA gene partial sequence internal transcribed spacer 2 complete sequence and large subunit ribosomal RNA gene partial sequence_{aga}	KY817957.1 Aquilaria crassna voucher CS-6 small subunit ribosomal RNA gene partial sequence internal transcribed spacer 1 5.8S ribosomal RNA gene and internal transcribed spacer 2 complete sequence and large subunit ribosomal RNA gene partial sequence	0	0
KX424704.1 Aquilaria beccariana 5.8S ribosomal RNA gene partial sequence internal transcribed spacer 2 complete sequence and 28S ribosomal RNA gene partial sequence_{aga}	KY817957.1 Aquilaria crassna voucher CS-6 small subunit ribosomal RNA gene partial sequence internal transcribed spacer 1 5.8S ribosomal RNA gene and internal transcribed spacer 2 complete sequence and large subunit ribosomal RNA gene partial sequence	0.0438711	0.011062
KU238038.1 Aquilaria crassna voucher FBL G11 WC3 internal transcribed spacer 2 partial sequence	KY817957.1 Aquilaria crassna voucher CS-6 small subunit ribosomal RNA gene partial sequence internal transcribed spacer 1 5.8S ribosomal RNA gene and internal transcribed spacer 2 complete sequence and large subunit ribosomal RNA gene partial sequence	0	0
MH134139.1 Aquilaria crassna internal transcribed spacer 1 partial sequence 5.8S ribosomal RNA gene complete sequence and internal transcribed spacer 2 partial sequence	KY817957.1 Aquilaria crassna voucher CS-6 small subunit ribosomal RNA gene partial sequence internal transcribed spacer 1 5.8S ribosomal RNA gene and internal transcribed spacer 2 complete sequence and large subunit ribosomal RNA gene partial sequence	0	0
KU244111.1 Aquilaria crassna voucher FBL01017 internal transcribed spacer 2 partial sequence	KY817957.1 Aquilaria crassna voucher CS-6 small subunit ribosomal RNA gene partial sequence internal transcribed spacer 1 5.8S ribosomal RNA gene and internal transcribed spacer 2 complete sequence and large subunit ribosomal RNA gene partial sequence	0	0
KU244110.1 Aquilaria crassna voucher FBL01014 internal transcribed spacer 2 partial sequence	KY817957.1 Aquilaria crassna voucher CS-6 small subunit ribosomal RNA gene partial sequence internal transcribed spacer 1 5.8S ribosomal RNA gene and internal transcribed spacer 2 complete sequence and large subunit ribosomal RNA gene partial sequence	0	0
KU244109.1 Aquilaria crassna voucher FBL01013 internal transcribed spacer 2 partial sequence	KY817957.1 Aquilaria crassna voucher CS-6 small subunit ribosomal RNA gene partial sequence internal transcribed spacer 1 5.8S ribosomal RNA gene and internal transcribed spacer 2 complete sequence and large subunit ribosomal RNA gene partial sequence	0	0
KU244108.1 Aquilaria crassna voucher FBL01012 internal transcribed spacer 2 partial sequence	KY817957.1 Aquilaria crassna voucher CS-6 small subunit ribosomal RNA gene partial sequence internal transcribed spacer 1 5.8S ribosomal RNA gene and internal transcribed spacer 2 complete sequence and large subunit ribosomal RNA gene partial sequence	0	0
KU238037.1 Aquilaria crassna voucher FBL G10 WC2 internal transcribed spacer 2 partial sequence	KY817957.1 Aquilaria crassna voucher CS-6 small subunit ribosomal RNA gene partial sequence internal transcribed spacer 1 5.8S ribosomal RNA gene and internal transcribed spacer 2 complete sequence and large subunit ribosomal RNA gene partial sequence	0.0027248	0.00273681
KU238035.1 Aquilaria crassna voucher FBL G04 WC1 internal transcribed spacer 2 partial sequence	KY817957.1 Aquilaria crassna voucher CS-6 small subunit ribosomal RNA gene partial sequence internal transcribed spacer 1 5.8S ribosomal RNA gene and internal transcribed spacer 2 complete sequence and large subunit ribosomal RNA gene partial sequence	0.0027248	0.00273681
KU244085.1 Aquilaria crassna voucher FBL01017 internal transcribed spacer 1 partial sequence 5.8S ribosomal RNA gene complete sequence and internal transcribed spacer 2 partial sequence	KY817957.1 Aquilaria crassna voucher CS-6 small subunit ribosomal RNA gene partial sequence internal transcribed spacer 1 5.8S ribosomal RNA gene and internal transcribed spacer 2 complete sequence and large subunit ribosomal RNA gene partial sequence	0	0
KU244084.1 Aquilaria crassna voucher FBL01014 internal transcribed spacer 1 partial sequence 5.8S ribosomal RNA gene complete sequence and internal transcribed spacer 2 partial sequence	KY817957.1 Aquilaria crassna voucher CS-6 small subunit ribosomal RNA gene partial sequence internal transcribed spacer 1 5.8S ribosomal RNA gene and internal transcribed spacer 2 complete sequence and large subunit ribosomal RNA gene partial sequence	0	0
KU244083.1 Aquilaria crassna voucher FBL01013 internal transcribed spacer 1 partial sequence 5.8S ribosomal RNA gene complete sequence and internal transcribed spacer 2 partial sequence_{cra}	KY817957.1 Aquilaria crassna voucher CS-6 small subunit ribosomal RNA gene partial sequence internal transcribed spacer 1 5.8S ribosomal RNA gene and internal transcribed spacer 2 complete sequence and large subunit ribosomal RNA gene partial sequence	0	0
KU244082.1 Aquilaria crassna voucher FBL01012 internal transcribed spacer 1 partial sequence 5.8S ribosomal RNA gene complete sequence and internal transcribed spacer 2 partial sequence	KY817957.1 Aquilaria crassna voucher CS-6 small subunit ribosomal RNA gene partial sequence internal transcribed spacer 1 5.8S ribosomal RNA gene and internal transcribed spacer 2 complete sequence and large subunit ribosomal RNA gene partial sequence	0	0
KT364478.1 Aquilaria crassna voucher FBL01012 internal transcribed spacer 1 partial sequence 5.8S ribosomal RNA gene complete sequence and internal transcribed spacer 2 partial sequence	KY817957.1 Aquilaria crassna voucher CS-6 small subunit ribosomal RNA gene partial sequence internal transcribed spacer 1 5.8S ribosomal RNA gene and internal transcribed spacer 2 complete sequence and large subunit ribosomal RNA gene partial sequence	0	0
KY817982.1 Aquilaria crassna voucher S-9 small subunit ribosomal RNA gene partial sequence internal transcribed spacer 1 5.8S ribosomal RNA gene and internal transcribed spacer 2 complete sequence and large subunit ribosomal RNA gene partial sequence	KY817957.1 Aquilaria crassna voucher CS-6 small subunit ribosomal RNA gene partial sequence internal transcribed spacer 1 5.8S ribosomal RNA gene and internal transcribed spacer 2 complete sequence and large subunit ribosomal RNA gene partial sequence	0	0
KY817979.1 Aquilaria crassna voucher S-1 small subunit ribosomal RNA gene partial sequence internal transcribed spacer 1 5.8S ribosomal RNA gene and internal transcribed spacer 2 complete sequence and large subunit ribosomal RNA gene partial sequence	KY817957.1 Aquilaria crassna voucher CS-6 small subunit ribosomal RNA gene partial sequence internal transcribed spacer 1 5.8S ribosomal RNA gene and internal transcribed spacer 2 complete sequence and large subunit ribosomal RNA gene partial sequence	0	0
KY817973.1 Aquilaria crassna voucher ML-9 small subunit ribosomal RNA gene partial sequence internal transcribed spacer 1 5.8S ribosomal RNA gene and internal transcribed spacer 2 complete sequence and large subunit ribosomal RNA gene partial sequence	KY817957.1 Aquilaria crassna voucher CS-6 small subunit ribosomal RNA gene partial sequence internal transcribed spacer 1 5.8S ribosomal RNA gene and internal transcribed spacer 2 complete sequence and large subunit ribosomal RNA gene partial sequence	0	0
KY817972.1 Aquilaria crassna voucher ML-8 small subunit ribosomal RNA gene partial sequence internal transcribed spacer 1 5.8S ribosomal RNA gene and internal transcribed spacer 2 complete sequence and large subunit ribosomal RNA gene partial sequence	KY817957.1 Aquilaria crassna voucher CS-6 small subunit ribosomal RNA gene partial sequence internal transcribed spacer 1 5.8S ribosomal RNA gene and internal transcribed spacer 2 complete sequence and large subunit ribosomal RNA gene partial sequence	0	0
KY817971.1 Aquilaria crassna voucher ML-7 small subunit ribosomal RNA gene partial sequence internal transcribed spacer 1 5.8S ribosomal RNA gene and internal transcribed spacer 2 complete sequence and large subunit ribosomal RNA gene partial sequence	KY817957.1 Aquilaria crassna voucher CS-6 small subunit ribosomal RNA gene partial sequence internal transcribed spacer 1 5.8S ribosomal RNA gene and internal transcribed spacer 2 complete sequence and large subunit ribosomal RNA gene partial sequence	0	0
KY817970.1 Aquilaria crassna voucher ML-6 small subunit ribosomal RNA gene partial sequence internal transcribed spacer 1 5.8S ribosomal RNA gene and internal transcribed spacer 2 complete sequence and large subunit ribosomal RNA gene partial sequence	KY817957.1 Aquilaria crassna voucher CS-6 small subunit ribosomal RNA gene partial sequence internal transcribed spacer 1 5.8S ribosomal RNA gene and internal transcribed spacer 2 complete sequence and large subunit ribosomal RNA gene partial sequence	0	0
KY817969.1 Aquilaria crassna voucher ML-5 small subunit ribosomal RNA gene partial sequence internal transcribed spacer 1 5.8S ribosomal RNA gene and internal transcribed spacer 2 complete sequence and large subunit ribosomal RNA gene partial sequence	KY817957.1 Aquilaria crassna voucher CS-6 small subunit ribosomal RNA gene partial sequence internal transcribed spacer 1 5.8S ribosomal RNA gene and internal transcribed spacer 2 complete sequence and large subunit ribosomal RNA gene partial sequence	0	0
KY817968.1 Aquilaria crassna voucher ML-4 small subunit ribosomal RNA gene partial sequence internal transcribed spacer 1 5.8S ribosomal RNA gene and internal transcribed spacer 2 complete sequence and large subunit ribosomal RNA gene partial sequence	KY817957.1 Aquilaria crassna voucher CS-6 small subunit ribosomal RNA gene partial sequence internal transcribed spacer 1 5.8S ribosomal RNA gene and internal transcribed spacer 2 complete sequence and large subunit ribosomal RNA gene partial sequence	0	0
KY817967.1 Aquilaria crassna voucher ML-3 small subunit ribosomal RNA gene partial sequence internal transcribed spacer 1 5.8S ribosomal RNA gene and internal transcribed spacer 2 complete sequence and large subunit ribosomal RNA gene partial sequence	KY817957.1 Aquilaria crassna voucher CS-6 small subunit ribosomal RNA gene partial sequence internal transcribed spacer 1 5.8S ribosomal RNA gene and internal transcribed spacer 2 complete sequence and large subunit ribosomal RNA gene partial sequence	0	0
KY817964.1 Aquilaria crassna voucher CS-13 small subunit ribosomal RNA gene partial sequence internal transcribed spacer 1 5.8S ribosomal RNA gene and internal transcribed spacer 2 complete sequence and large subunit ribosomal RNA gene partial sequence	KY817957.1 Aquilaria crassna voucher CS-6 small subunit ribosomal RNA gene partial sequence internal transcribed spacer 1 5.8S ribosomal RNA gene and internal transcribed spacer 2 complete sequence and large subunit ribosomal RNA gene partial sequence	0	0
KY817963.1 Aquilaria crassna voucher CS-12 small subunit ribosomal RNA gene partial sequence internal transcribed spacer 1 5.8S ribosomal RNA gene and internal transcribed spacer 2 complete sequence and large subunit ribosomal RNA gene partial sequence	KY817957.1 Aquilaria crassna voucher CS-6 small subunit ribosomal RNA gene partial sequence internal transcribed spacer 1 5.8S ribosomal RNA gene and internal transcribed spacer 2 complete sequence and large subunit ribosomal RNA gene partial sequence	0	0
KY817962.1 Aquilaria crassna voucher CS-11 small subunit ribosomal RNA gene partial sequence internal transcribed spacer 1 5.8S ribosomal RNA gene and internal transcribed spacer 2 complete sequence and large subunit ribosomal RNA gene partial sequence	KY817957.1 Aquilaria crassna voucher CS-6 small subunit ribosomal RNA gene partial sequence internal transcribed spacer 1 5.8S ribosomal RNA gene and internal transcribed spacer 2 complete sequence and large subunit ribosomal RNA gene partial sequence	0	0
KY817961.1 Aquilaria crassna voucher CS-10 small subunit ribosomal RNA gene partial sequence internal transcribed spacer 1 5.8S ribosomal RNA gene and internal transcribed spacer 2 complete sequence and large subunit ribosomal RNA gene partial sequence	KY817957.1 Aquilaria crassna voucher CS-6 small subunit ribosomal RNA gene partial sequence internal transcribed spacer 1 5.8S ribosomal RNA gene and internal transcribed spacer 2 complete sequence and large subunit ribosomal RNA gene partial sequence	0	0
KY817959.1 Aquilaria crassna voucher CS-8 small subunit ribosomal RNA gene partial sequence internal transcribed spacer 1 5.8S ribosomal RNA gene and internal transcribed spacer 2 complete sequence and large subunit ribosomal RNA gene partial sequence	KY817957.1 Aquilaria crassna voucher CS-6 small subunit ribosomal RNA gene partial sequence internal transcribed spacer 1 5.8S ribosomal RNA gene and internal transcribed spacer 2 complete sequence and large subunit ribosomal RNA gene partial sequence	0	0
KY817958.1 Aquilaria crassna voucher CS-7 small subunit ribosomal RNA gene partial sequence internal transcribed spacer 1 5.8S ribosomal RNA gene and internal transcribed spacer 2 complete sequence and large subunit ribosomal RNA gene partial sequence	KY817957.1 Aquilaria crassna voucher CS-6 small subunit ribosomal RNA gene partial sequence internal transcribed spacer 1 5.8S ribosomal RNA gene and internal transcribed spacer 2 complete sequence and large subunit ribosomal RNA gene partial sequence	0	0
MH134137.1 Aquilaria agallochum internal transcribed spacer 1 partial sequence 5.8S ribosomal RNA gene complete sequence and internal transcribed spacer 2 partial sequence_{aga}	KY817953.1 Aquilaria crassna voucher CS-2 small subunit ribosomal RNA gene partial sequence internal transcribed spacer 1 5.8S ribosomal RNA gene and internal transcribed spacer 2 complete sequence and large subunit ribosomal RNA gene partial sequence	0.0165072	0.0059524
KU879012.1 Aquilaria agallochum 18S ribosomal RNA gene partial sequence internal transcribed spacer 1 5.8S ribosomal RNA gene and internal transcribed spacer 2 complete sequence and 28S ribosomal RNA gene partial sequence_{aga}	KY817953.1 Aquilaria crassna voucher CS-2 small subunit ribosomal RNA gene partial sequence internal transcribed spacer 1 5.8S ribosomal RNA gene and internal transcribed spacer 2 complete sequence and large subunit ribosomal RNA gene partial sequence	0.0221253	0.00719082
MH134138.1 Aquilaria beccariana internal transcribed spacer 1 partial sequence 5.8S ribosomal RNA gene complete sequence and internal transcribed spacer 2 partial sequence_{aga}	KY817953.1 Aquilaria crassna voucher CS-2 small subunit ribosomal RNA gene partial sequence internal transcribed spacer 1 5.8S ribosomal RNA gene and internal transcribed spacer 2 complete sequence and large subunit ribosomal RNA gene partial sequence	0.0220708	0.00727399
KT779116.1 Aquilaria beccariana voucher FBL04001 internal transcribed spacer 1 partial sequence 5.8S ribosomal RNA gene complete sequence and internal transcribed spacer 2 partial sequence_{aga}	KY817953.1 Aquilaria crassna voucher CS-2 small subunit ribosomal RNA gene partial sequence internal transcribed spacer 1 5.8S ribosomal RNA gene and internal transcribed spacer 2 complete sequence and large subunit ribosomal RNA gene partial sequence	0.0421308	0.0101917
KT364477.1 Aquilaria beccariana voucher SFN29381 internal transcribed spacer 1 partial sequence 5.8S ribosomal RNA gene complete sequence and internal transcribed spacer 2 partial sequence_{aga}	KY817953.1 Aquilaria crassna voucher CS-2 small subunit ribosomal RNA gene partial sequence internal transcribed spacer 1 5.8S ribosomal RNA gene and internal transcribed spacer 2 complete sequence and large subunit ribosomal RNA gene partial sequence	0.0221534	0.00722737
KX351419.1 Aquilaria beccariana voucher S1 5.8S ribosomal RNA gene partial sequence internal transcribed spacer 2 complete sequence and large subunit ribosomal RNA gene partial sequence_{aga}	KY817953.1 Aquilaria crassna voucher CS-2 small subunit ribosomal RNA gene partial sequence internal transcribed spacer 1 5.8S ribosomal RNA gene and internal transcribed spacer 2 complete sequence and large subunit ribosomal RNA gene partial sequence	0	0
KX424704.1 Aquilaria beccariana 5.8S ribosomal RNA gene partial sequence internal transcribed spacer 2 complete sequence and 28S ribosomal RNA gene partial sequence_{aga}	KY817953.1 Aquilaria crassna voucher CS-2 small subunit ribosomal RNA gene partial sequence internal transcribed spacer 1 5.8S ribosomal RNA gene and internal transcribed spacer 2 complete sequence and large subunit ribosomal RNA gene partial sequence	0.0438711	0.011062
KU238038.1 Aquilaria crassna voucher FBL G11 WC3 internal transcribed spacer 2 partial sequence	KY817953.1 Aquilaria crassna voucher CS-2 small subunit ribosomal RNA gene partial sequence internal transcribed spacer 1 5.8S ribosomal RNA gene and internal transcribed spacer 2 complete sequence and large subunit ribosomal RNA gene partial sequence	0	0
MH134139.1 Aquilaria crassna internal transcribed spacer 1 partial sequence 5.8S ribosomal RNA gene complete sequence and internal transcribed spacer 2 partial sequence	KY817953.1 Aquilaria crassna voucher CS-2 small subunit ribosomal RNA gene partial sequence internal transcribed spacer 1 5.8S ribosomal RNA gene and internal transcribed spacer 2 complete sequence and large subunit ribosomal RNA gene partial sequence	0	0
KU244111.1 Aquilaria crassna voucher FBL01017 internal transcribed spacer 2 partial sequence	KY817953.1 Aquilaria crassna voucher CS-2 small subunit ribosomal RNA gene partial sequence internal transcribed spacer 1 5.8S ribosomal RNA gene and internal transcribed spacer 2 complete sequence and large subunit ribosomal RNA gene partial sequence	0	0
KU244110.1 Aquilaria crassna voucher FBL01014 internal transcribed spacer 2 partial sequence	KY817953.1 Aquilaria crassna voucher CS-2 small subunit ribosomal RNA gene partial sequence internal transcribed spacer 1 5.8S ribosomal RNA gene and internal transcribed spacer 2 complete sequence and large subunit ribosomal RNA gene partial sequence	0	0
KU244109.1 Aquilaria crassna voucher FBL01013 internal transcribed spacer 2 partial sequence	KY817953.1 Aquilaria crassna voucher CS-2 small subunit ribosomal RNA gene partial sequence internal transcribed spacer 1 5.8S ribosomal RNA gene and internal transcribed spacer 2 complete sequence and large subunit ribosomal RNA gene partial sequence	0	0
KU244108.1 Aquilaria crassna voucher FBL01012 internal transcribed spacer 2 partial sequence	KY817953.1 Aquilaria crassna voucher CS-2 small subunit ribosomal RNA gene partial sequence internal transcribed spacer 1 5.8S ribosomal RNA gene and internal transcribed spacer 2 complete sequence and large subunit ribosomal RNA gene partial sequence	0	0
KU238037.1 Aquilaria crassna voucher FBL G10 WC2 internal transcribed spacer 2 partial sequence	KY817953.1 Aquilaria crassna voucher CS-2 small subunit ribosomal RNA gene partial sequence internal transcribed spacer 1 5.8S ribosomal RNA gene and internal transcribed spacer 2 complete sequence and large subunit ribosomal RNA gene partial sequence	0.0027248	0.00273681
KU238035.1 Aquilaria crassna voucher FBL G04 WC1 internal transcribed spacer 2 partial sequence	KY817953.1 Aquilaria crassna voucher CS-2 small subunit ribosomal RNA gene partial sequence internal transcribed spacer 1 5.8S ribosomal RNA gene and internal transcribed spacer 2 complete sequence and large subunit ribosomal RNA gene partial sequence	0.0027248	0.00273681
KU244085.1 Aquilaria crassna voucher FBL01017 internal transcribed spacer 1 partial sequence 5.8S ribosomal RNA gene complete sequence and internal transcribed spacer 2 partial sequence	KY817953.1 Aquilaria crassna voucher CS-2 small subunit ribosomal RNA gene partial sequence internal transcribed spacer 1 5.8S ribosomal RNA gene and internal transcribed spacer 2 complete sequence and large subunit ribosomal RNA gene partial sequence	0	0
KU244084.1 Aquilaria crassna voucher FBL01014 internal transcribed spacer 1 partial sequence 5.8S ribosomal RNA gene complete sequence and internal transcribed spacer 2 partial sequence	KY817953.1 Aquilaria crassna voucher CS-2 small subunit ribosomal RNA gene partial sequence internal transcribed spacer 1 5.8S ribosomal RNA gene and internal transcribed spacer 2 complete sequence and large subunit ribosomal RNA gene partial sequence	0	0
KU244083.1 Aquilaria crassna voucher FBL01013 internal transcribed spacer 1 partial sequence 5.8S ribosomal RNA gene complete sequence and internal transcribed spacer 2 partial sequence_{cra}	KY817953.1 Aquilaria crassna voucher CS-2 small subunit ribosomal RNA gene partial sequence internal transcribed spacer 1 5.8S ribosomal RNA gene and internal transcribed spacer 2 complete sequence and large subunit ribosomal RNA gene partial sequence	0	0
KU244082.1 Aquilaria crassna voucher FBL01012 internal transcribed spacer 1 partial sequence 5.8S ribosomal RNA gene complete sequence and internal transcribed spacer 2 partial sequence	KY817953.1 Aquilaria crassna voucher CS-2 small subunit ribosomal RNA gene partial sequence internal transcribed spacer 1 5.8S ribosomal RNA gene and internal transcribed spacer 2 complete sequence and large subunit ribosomal RNA gene partial sequence	0	0
KT364478.1 Aquilaria crassna voucher FBL01012 internal transcribed spacer 1 partial sequence 5.8S ribosomal RNA gene complete sequence and internal transcribed spacer 2 partial sequence	KY817953.1 Aquilaria crassna voucher CS-2 small subunit ribosomal RNA gene partial sequence internal transcribed spacer 1 5.8S ribosomal RNA gene and internal transcribed spacer 2 complete sequence and large subunit ribosomal RNA gene partial sequence	0	0
KY817982.1 Aquilaria crassna voucher S-9 small subunit ribosomal RNA gene partial sequence internal transcribed spacer 1 5.8S ribosomal RNA gene and internal transcribed spacer 2 complete sequence and large subunit ribosomal RNA gene partial sequence	KY817953.1 Aquilaria crassna voucher CS-2 small subunit ribosomal RNA gene partial sequence internal transcribed spacer 1 5.8S ribosomal RNA gene and internal transcribed spacer 2 complete sequence and large subunit ribosomal RNA gene partial sequence	0	0
KY817979.1 Aquilaria crassna voucher S-1 small subunit ribosomal RNA gene partial sequence internal transcribed spacer 1 5.8S ribosomal RNA gene and internal transcribed spacer 2 complete sequence and large subunit ribosomal RNA gene partial sequence	KY817953.1 Aquilaria crassna voucher CS-2 small subunit ribosomal RNA gene partial sequence internal transcribed spacer 1 5.8S ribosomal RNA gene and internal transcribed spacer 2 complete sequence and large subunit ribosomal RNA gene partial sequence	0	0
KY817973.1 Aquilaria crassna voucher ML-9 small subunit ribosomal RNA gene partial sequence internal transcribed spacer 1 5.8S ribosomal RNA gene and internal transcribed spacer 2 complete sequence and large subunit ribosomal RNA gene partial sequence	KY817953.1 Aquilaria crassna voucher CS-2 small subunit ribosomal RNA gene partial sequence internal transcribed spacer 1 5.8S ribosomal RNA gene and internal transcribed spacer 2 complete sequence and large subunit ribosomal RNA gene partial sequence	0	0
KY817972.1 Aquilaria crassna voucher ML-8 small subunit ribosomal RNA gene partial sequence internal transcribed spacer 1 5.8S ribosomal RNA gene and internal transcribed spacer 2 complete sequence and large subunit ribosomal RNA gene partial sequence	KY817953.1 Aquilaria crassna voucher CS-2 small subunit ribosomal RNA gene partial sequence internal transcribed spacer 1 5.8S ribosomal RNA gene and internal transcribed spacer 2 complete sequence and large subunit ribosomal RNA gene partial sequence	0	0
KY817971.1 Aquilaria crassna voucher ML-7 small subunit ribosomal RNA gene partial sequence internal transcribed spacer 1 5.8S ribosomal RNA gene and internal transcribed spacer 2 complete sequence and large subunit ribosomal RNA gene partial sequence	KY817953.1 Aquilaria crassna voucher CS-2 small subunit ribosomal RNA gene partial sequence internal transcribed spacer 1 5.8S ribosomal RNA gene and internal transcribed spacer 2 complete sequence and large subunit ribosomal RNA gene partial sequence	0	0
KY817970.1 Aquilaria crassna voucher ML-6 small subunit ribosomal RNA gene partial sequence internal transcribed spacer 1 5.8S ribosomal RNA gene and internal transcribed spacer 2 complete sequence and large subunit ribosomal RNA gene partial sequence	KY817953.1 Aquilaria crassna voucher CS-2 small subunit ribosomal RNA gene partial sequence internal transcribed spacer 1 5.8S ribosomal RNA gene and internal transcribed spacer 2 complete sequence and large subunit ribosomal RNA gene partial sequence	0	0
KY817969.1 Aquilaria crassna voucher ML-5 small subunit ribosomal RNA gene partial sequence internal transcribed spacer 1 5.8S ribosomal RNA gene and internal transcribed spacer 2 complete sequence and large subunit ribosomal RNA gene partial sequence	KY817953.1 Aquilaria crassna voucher CS-2 small subunit ribosomal RNA gene partial sequence internal transcribed spacer 1 5.8S ribosomal RNA gene and internal transcribed spacer 2 complete sequence and large subunit ribosomal RNA gene partial sequence	0	0
KY817968.1 Aquilaria crassna voucher ML-4 small subunit ribosomal RNA gene partial sequence internal transcribed spacer 1 5.8S ribosomal RNA gene and internal transcribed spacer 2 complete sequence and large subunit ribosomal RNA gene partial sequence	KY817953.1 Aquilaria crassna voucher CS-2 small subunit ribosomal RNA gene partial sequence internal transcribed spacer 1 5.8S ribosomal RNA gene and internal transcribed spacer 2 complete sequence and large subunit ribosomal RNA gene partial sequence	0	0
KY817967.1 Aquilaria crassna voucher ML-3 small subunit ribosomal RNA gene partial sequence internal transcribed spacer 1 5.8S ribosomal RNA gene and internal transcribed spacer 2 complete sequence and large subunit ribosomal RNA gene partial sequence	KY817953.1 Aquilaria crassna voucher CS-2 small subunit ribosomal RNA gene partial sequence internal transcribed spacer 1 5.8S ribosomal RNA gene and internal transcribed spacer 2 complete sequence and large subunit ribosomal RNA gene partial sequence	0	0
KY817964.1 Aquilaria crassna voucher CS-13 small subunit ribosomal RNA gene partial sequence internal transcribed spacer 1 5.8S ribosomal RNA gene and internal transcribed spacer 2 complete sequence and large subunit ribosomal RNA gene partial sequence	KY817953.1 Aquilaria crassna voucher CS-2 small subunit ribosomal RNA gene partial sequence internal transcribed spacer 1 5.8S ribosomal RNA gene and internal transcribed spacer 2 complete sequence and large subunit ribosomal RNA gene partial sequence	0	0
KY817963.1 Aquilaria crassna voucher CS-12 small subunit ribosomal RNA gene partial sequence internal transcribed spacer 1 5.8S ribosomal RNA gene and internal transcribed spacer 2 complete sequence and large subunit ribosomal RNA gene partial sequence	KY817953.1 Aquilaria crassna voucher CS-2 small subunit ribosomal RNA gene partial sequence internal transcribed spacer 1 5.8S ribosomal RNA gene and internal transcribed spacer 2 complete sequence and large subunit ribosomal RNA gene partial sequence	0	0
KY817962.1 Aquilaria crassna voucher CS-11 small subunit ribosomal RNA gene partial sequence internal transcribed spacer 1 5.8S ribosomal RNA gene and internal transcribed spacer 2 complete sequence and large subunit ribosomal RNA gene partial sequence	KY817953.1 Aquilaria crassna voucher CS-2 small subunit ribosomal RNA gene partial sequence internal transcribed spacer 1 5.8S ribosomal RNA gene and internal transcribed spacer 2 complete sequence and large subunit ribosomal RNA gene partial sequence	0	0
KY817961.1 Aquilaria crassna voucher CS-10 small subunit ribosomal RNA gene partial sequence internal transcribed spacer 1 5.8S ribosomal RNA gene and internal transcribed spacer 2 complete sequence and large subunit ribosomal RNA gene partial sequence	KY817953.1 Aquilaria crassna voucher CS-2 small subunit ribosomal RNA gene partial sequence internal transcribed spacer 1 5.8S ribosomal RNA gene and internal transcribed spacer 2 complete sequence and large subunit ribosomal RNA gene partial sequence	0	0
KY817959.1 Aquilaria crassna voucher CS-8 small subunit ribosomal RNA gene partial sequence internal transcribed spacer 1 5.8S ribosomal RNA gene and internal transcribed spacer 2 complete sequence and large subunit ribosomal RNA gene partial sequence	KY817953.1 Aquilaria crassna voucher CS-2 small subunit ribosomal RNA gene partial sequence internal transcribed spacer 1 5.8S ribosomal RNA gene and internal transcribed spacer 2 complete sequence and large subunit ribosomal RNA gene partial sequence	0	0
KY817958.1 Aquilaria crassna voucher CS-7 small subunit ribosomal RNA gene partial sequence internal transcribed spacer 1 5.8S ribosomal RNA gene and internal transcribed spacer 2 complete sequence and large subunit ribosomal RNA gene partial sequence	KY817953.1 Aquilaria crassna voucher CS-2 small subunit ribosomal RNA gene partial sequence internal transcribed spacer 1 5.8S ribosomal RNA gene and internal transcribed spacer 2 complete sequence and large subunit ribosomal RNA gene partial sequence	0	0
KY817957.1 Aquilaria crassna voucher CS-6 small subunit ribosomal RNA gene partial sequence internal transcribed spacer 1 5.8S ribosomal RNA gene and internal transcribed spacer 2 complete sequence and large subunit ribosomal RNA gene partial sequence	KY817953.1 Aquilaria crassna voucher CS-2 small subunit ribosomal RNA gene partial sequence internal transcribed spacer 1 5.8S ribosomal RNA gene and internal transcribed spacer 2 complete sequence and large subunit ribosomal RNA gene partial sequence	0	0
MH134137.1 Aquilaria agallochum internal transcribed spacer 1 partial sequence 5.8S ribosomal RNA gene complete sequence and internal transcribed spacer 2 partial sequence_{aga}	KY817951.1 Aquilaria crassna voucher TP-27 small subunit ribosomal RNA gene partial sequence internal transcribed spacer 1 5.8S ribosomal RNA gene and internal transcribed spacer 2 complete sequence and large subunit ribosomal RNA gene partial sequence	0.0165072	0.0059524
KU879012.1 Aquilaria agallochum 18S ribosomal RNA gene partial sequence internal transcribed spacer 1 5.8S ribosomal RNA gene and internal transcribed spacer 2 complete sequence and 28S ribosomal RNA gene partial sequence_{aga}	KY817951.1 Aquilaria crassna voucher TP-27 small subunit ribosomal RNA gene partial sequence internal transcribed spacer 1 5.8S ribosomal RNA gene and internal transcribed spacer 2 complete sequence and large subunit ribosomal RNA gene partial sequence	0.0221253	0.00719082
MH134138.1 Aquilaria beccariana internal transcribed spacer 1 partial sequence 5.8S ribosomal RNA gene complete sequence and internal transcribed spacer 2 partial sequence_{aga}	KY817951.1 Aquilaria crassna voucher TP-27 small subunit ribosomal RNA gene partial sequence internal transcribed spacer 1 5.8S ribosomal RNA gene and internal transcribed spacer 2 complete sequence and large subunit ribosomal RNA gene partial sequence	0.0220708	0.00727399
KT779116.1 Aquilaria beccariana voucher FBL04001 internal transcribed spacer 1 partial sequence 5.8S ribosomal RNA gene complete sequence and internal transcribed spacer 2 partial sequence_{aga}	KY817951.1 Aquilaria crassna voucher TP-27 small subunit ribosomal RNA gene partial sequence internal transcribed spacer 1 5.8S ribosomal RNA gene and internal transcribed spacer 2 complete sequence and large subunit ribosomal RNA gene partial sequence	0.0421308	0.0101917
KT364477.1 Aquilaria beccariana voucher SFN29381 internal transcribed spacer 1 partial sequence 5.8S ribosomal RNA gene complete sequence and internal transcribed spacer 2 partial sequence_{aga}	KY817951.1 Aquilaria crassna voucher TP-27 small subunit ribosomal RNA gene partial sequence internal transcribed spacer 1 5.8S ribosomal RNA gene and internal transcribed spacer 2 complete sequence and large subunit ribosomal RNA gene partial sequence	0.0221534	0.00722737
KX351419.1 Aquilaria beccariana voucher S1 5.8S ribosomal RNA gene partial sequence internal transcribed spacer 2 complete sequence and large subunit ribosomal RNA gene partial sequence_{aga}	KY817951.1 Aquilaria crassna voucher TP-27 small subunit ribosomal RNA gene partial sequence internal transcribed spacer 1 5.8S ribosomal RNA gene and internal transcribed spacer 2 complete sequence and large subunit ribosomal RNA gene partial sequence	0	0
KX424704.1 Aquilaria beccariana 5.8S ribosomal RNA gene partial sequence internal transcribed spacer 2 complete sequence and 28S ribosomal RNA gene partial sequence_{aga}	KY817951.1 Aquilaria crassna voucher TP-27 small subunit ribosomal RNA gene partial sequence internal transcribed spacer 1 5.8S ribosomal RNA gene and internal transcribed spacer 2 complete sequence and large subunit ribosomal RNA gene partial sequence	0.0438711	0.011062
KU238038.1 Aquilaria crassna voucher FBL G11 WC3 internal transcribed spacer 2 partial sequence	KY817951.1 Aquilaria crassna voucher TP-27 small subunit ribosomal RNA gene partial sequence internal transcribed spacer 1 5.8S ribosomal RNA gene and internal transcribed spacer 2 complete sequence and large subunit ribosomal RNA gene partial sequence	0	0
MH134139.1 Aquilaria crassna internal transcribed spacer 1 partial sequence 5.8S ribosomal RNA gene complete sequence and internal transcribed spacer 2 partial sequence	KY817951.1 Aquilaria crassna voucher TP-27 small subunit ribosomal RNA gene partial sequence internal transcribed spacer 1 5.8S ribosomal RNA gene and internal transcribed spacer 2 complete sequence and large subunit ribosomal RNA gene partial sequence	0	0
KU244111.1 Aquilaria crassna voucher FBL01017 internal transcribed spacer 2 partial sequence	KY817951.1 Aquilaria crassna voucher TP-27 small subunit ribosomal RNA gene partial sequence internal transcribed spacer 1 5.8S ribosomal RNA gene and internal transcribed spacer 2 complete sequence and large subunit ribosomal RNA gene partial sequence	0	0
KU244110.1 Aquilaria crassna voucher FBL01014 internal transcribed spacer 2 partial sequence	KY817951.1 Aquilaria crassna voucher TP-27 small subunit ribosomal RNA gene partial sequence internal transcribed spacer 1 5.8S ribosomal RNA gene and internal transcribed spacer 2 complete sequence and large subunit ribosomal RNA gene partial sequence	0	0
KU244109.1 Aquilaria crassna voucher FBL01013 internal transcribed spacer 2 partial sequence	KY817951.1 Aquilaria crassna voucher TP-27 small subunit ribosomal RNA gene partial sequence internal transcribed spacer 1 5.8S ribosomal RNA gene and internal transcribed spacer 2 complete sequence and large subunit ribosomal RNA gene partial sequence	0	0
KU244108.1 Aquilaria crassna voucher FBL01012 internal transcribed spacer 2 partial sequence	KY817951.1 Aquilaria crassna voucher TP-27 small subunit ribosomal RNA gene partial sequence internal transcribed spacer 1 5.8S ribosomal RNA gene and internal transcribed spacer 2 complete sequence and large subunit ribosomal RNA gene partial sequence	0	0
KU238037.1 Aquilaria crassna voucher FBL G10 WC2 internal transcribed spacer 2 partial sequence	KY817951.1 Aquilaria crassna voucher TP-27 small subunit ribosomal RNA gene partial sequence internal transcribed spacer 1 5.8S ribosomal RNA gene and internal transcribed spacer 2 complete sequence and large subunit ribosomal RNA gene partial sequence	0.0027248	0.00273681
KU238035.1 Aquilaria crassna voucher FBL G04 WC1 internal transcribed spacer 2 partial sequence	KY817951.1 Aquilaria crassna voucher TP-27 small subunit ribosomal RNA gene partial sequence internal transcribed spacer 1 5.8S ribosomal RNA gene and internal transcribed spacer 2 complete sequence and large subunit ribosomal RNA gene partial sequence	0.0027248	0.00273681
KU244085.1 Aquilaria crassna voucher FBL01017 internal transcribed spacer 1 partial sequence 5.8S ribosomal RNA gene complete sequence and internal transcribed spacer 2 partial sequence	KY817951.1 Aquilaria crassna voucher TP-27 small subunit ribosomal RNA gene partial sequence internal transcribed spacer 1 5.8S ribosomal RNA gene and internal transcribed spacer 2 complete sequence and large subunit ribosomal RNA gene partial sequence	0	0
KU244084.1 Aquilaria crassna voucher FBL01014 internal transcribed spacer 1 partial sequence 5.8S ribosomal RNA gene complete sequence and internal transcribed spacer 2 partial sequence	KY817951.1 Aquilaria crassna voucher TP-27 small subunit ribosomal RNA gene partial sequence internal transcribed spacer 1 5.8S ribosomal RNA gene and internal transcribed spacer 2 complete sequence and large subunit ribosomal RNA gene partial sequence	0	0
KU244083.1 Aquilaria crassna voucher FBL01013 internal transcribed spacer 1 partial sequence 5.8S ribosomal RNA gene complete sequence and internal transcribed spacer 2 partial sequence_{cra}	KY817951.1 Aquilaria crassna voucher TP-27 small subunit ribosomal RNA gene partial sequence internal transcribed spacer 1 5.8S ribosomal RNA gene and internal transcribed spacer 2 complete sequence and large subunit ribosomal RNA gene partial sequence	0	0
KU244082.1 Aquilaria crassna voucher FBL01012 internal transcribed spacer 1 partial sequence 5.8S ribosomal RNA gene complete sequence and internal transcribed spacer 2 partial sequence	KY817951.1 Aquilaria crassna voucher TP-27 small subunit ribosomal RNA gene partial sequence internal transcribed spacer 1 5.8S ribosomal RNA gene and internal transcribed spacer 2 complete sequence and large subunit ribosomal RNA gene partial sequence	0	0
KT364478.1 Aquilaria crassna voucher FBL01012 internal transcribed spacer 1 partial sequence 5.8S ribosomal RNA gene complete sequence and internal transcribed spacer 2 partial sequence	KY817951.1 Aquilaria crassna voucher TP-27 small subunit ribosomal RNA gene partial sequence internal transcribed spacer 1 5.8S ribosomal RNA gene and internal transcribed spacer 2 complete sequence and large subunit ribosomal RNA gene partial sequence	0	0
KY817982.1 Aquilaria crassna voucher S-9 small subunit ribosomal RNA gene partial sequence internal transcribed spacer 1 5.8S ribosomal RNA gene and internal transcribed spacer 2 complete sequence and large subunit ribosomal RNA gene partial sequence	KY817951.1 Aquilaria crassna voucher TP-27 small subunit ribosomal RNA gene partial sequence internal transcribed spacer 1 5.8S ribosomal RNA gene and internal transcribed spacer 2 complete sequence and large subunit ribosomal RNA gene partial sequence	0	0
KY817979.1 Aquilaria crassna voucher S-1 small subunit ribosomal RNA gene partial sequence internal transcribed spacer 1 5.8S ribosomal RNA gene and internal transcribed spacer 2 complete sequence and large subunit ribosomal RNA gene partial sequence	KY817951.1 Aquilaria crassna voucher TP-27 small subunit ribosomal RNA gene partial sequence internal transcribed spacer 1 5.8S ribosomal RNA gene and internal transcribed spacer 2 complete sequence and large subunit ribosomal RNA gene partial sequence	0	0
KY817973.1 Aquilaria crassna voucher ML-9 small subunit ribosomal RNA gene partial sequence internal transcribed spacer 1 5.8S ribosomal RNA gene and internal transcribed spacer 2 complete sequence and large subunit ribosomal RNA gene partial sequence	KY817951.1 Aquilaria crassna voucher TP-27 small subunit ribosomal RNA gene partial sequence internal transcribed spacer 1 5.8S ribosomal RNA gene and internal transcribed spacer 2 complete sequence and large subunit ribosomal RNA gene partial sequence	0	0
KY817972.1 Aquilaria crassna voucher ML-8 small subunit ribosomal RNA gene partial sequence internal transcribed spacer 1 5.8S ribosomal RNA gene and internal transcribed spacer 2 complete sequence and large subunit ribosomal RNA gene partial sequence	KY817951.1 Aquilaria crassna voucher TP-27 small subunit ribosomal RNA gene partial sequence internal transcribed spacer 1 5.8S ribosomal RNA gene and internal transcribed spacer 2 complete sequence and large subunit ribosomal RNA gene partial sequence	0	0
KY817971.1 Aquilaria crassna voucher ML-7 small subunit ribosomal RNA gene partial sequence internal transcribed spacer 1 5.8S ribosomal RNA gene and internal transcribed spacer 2 complete sequence and large subunit ribosomal RNA gene partial sequence	KY817951.1 Aquilaria crassna voucher TP-27 small subunit ribosomal RNA gene partial sequence internal transcribed spacer 1 5.8S ribosomal RNA gene and internal transcribed spacer 2 complete sequence and large subunit ribosomal RNA gene partial sequence	0	0
KY817970.1 Aquilaria crassna voucher ML-6 small subunit ribosomal RNA gene partial sequence internal transcribed spacer 1 5.8S ribosomal RNA gene and internal transcribed spacer 2 complete sequence and large subunit ribosomal RNA gene partial sequence	KY817951.1 Aquilaria crassna voucher TP-27 small subunit ribosomal RNA gene partial sequence internal transcribed spacer 1 5.8S ribosomal RNA gene and internal transcribed spacer 2 complete sequence and large subunit ribosomal RNA gene partial sequence	0	0
KY817969.1 Aquilaria crassna voucher ML-5 small subunit ribosomal RNA gene partial sequence internal transcribed spacer 1 5.8S ribosomal RNA gene and internal transcribed spacer 2 complete sequence and large subunit ribosomal RNA gene partial sequence	KY817951.1 Aquilaria crassna voucher TP-27 small subunit ribosomal RNA gene partial sequence internal transcribed spacer 1 5.8S ribosomal RNA gene and internal transcribed spacer 2 complete sequence and large subunit ribosomal RNA gene partial sequence	0	0
KY817968.1 Aquilaria crassna voucher ML-4 small subunit ribosomal RNA gene partial sequence internal transcribed spacer 1 5.8S ribosomal RNA gene and internal transcribed spacer 2 complete sequence and large subunit ribosomal RNA gene partial sequence	KY817951.1 Aquilaria crassna voucher TP-27 small subunit ribosomal RNA gene partial sequence internal transcribed spacer 1 5.8S ribosomal RNA gene and internal transcribed spacer 2 complete sequence and large subunit ribosomal RNA gene partial sequence	0	0
KY817967.1 Aquilaria crassna voucher ML-3 small subunit ribosomal RNA gene partial sequence internal transcribed spacer 1 5.8S ribosomal RNA gene and internal transcribed spacer 2 complete sequence and large subunit ribosomal RNA gene partial sequence	KY817951.1 Aquilaria crassna voucher TP-27 small subunit ribosomal RNA gene partial sequence internal transcribed spacer 1 5.8S ribosomal RNA gene and internal transcribed spacer 2 complete sequence and large subunit ribosomal RNA gene partial sequence	0	0
KY817964.1 Aquilaria crassna voucher CS-13 small subunit ribosomal RNA gene partial sequence internal transcribed spacer 1 5.8S ribosomal RNA gene and internal transcribed spacer 2 complete sequence and large subunit ribosomal RNA gene partial sequence	KY817951.1 Aquilaria crassna voucher TP-27 small subunit ribosomal RNA gene partial sequence internal transcribed spacer 1 5.8S ribosomal RNA gene and internal transcribed spacer 2 complete sequence and large subunit ribosomal RNA gene partial sequence	0	0
KY817963.1 Aquilaria crassna voucher CS-12 small subunit ribosomal RNA gene partial sequence internal transcribed spacer 1 5.8S ribosomal RNA gene and internal transcribed spacer 2 complete sequence and large subunit ribosomal RNA gene partial sequence	KY817951.1 Aquilaria crassna voucher TP-27 small subunit ribosomal RNA gene partial sequence internal transcribed spacer 1 5.8S ribosomal RNA gene and internal transcribed spacer 2 complete sequence and large subunit ribosomal RNA gene partial sequence	0	0
KY817962.1 Aquilaria crassna voucher CS-11 small subunit ribosomal RNA gene partial sequence internal transcribed spacer 1 5.8S ribosomal RNA gene and internal transcribed spacer 2 complete sequence and large subunit ribosomal RNA gene partial sequence	KY817951.1 Aquilaria crassna voucher TP-27 small subunit ribosomal RNA gene partial sequence internal transcribed spacer 1 5.8S ribosomal RNA gene and internal transcribed spacer 2 complete sequence and large subunit ribosomal RNA gene partial sequence	0	0
KY817961.1 Aquilaria crassna voucher CS-10 small subunit ribosomal RNA gene partial sequence internal transcribed spacer 1 5.8S ribosomal RNA gene and internal transcribed spacer 2 complete sequence and large subunit ribosomal RNA gene partial sequence	KY817951.1 Aquilaria crassna voucher TP-27 small subunit ribosomal RNA gene partial sequence internal transcribed spacer 1 5.8S ribosomal RNA gene and internal transcribed spacer 2 complete sequence and large subunit ribosomal RNA gene partial sequence	0	0
KY817959.1 Aquilaria crassna voucher CS-8 small subunit ribosomal RNA gene partial sequence internal transcribed spacer 1 5.8S ribosomal RNA gene and internal transcribed spacer 2 complete sequence and large subunit ribosomal RNA gene partial sequence	KY817951.1 Aquilaria crassna voucher TP-27 small subunit ribosomal RNA gene partial sequence internal transcribed spacer 1 5.8S ribosomal RNA gene and internal transcribed spacer 2 complete sequence and large subunit ribosomal RNA gene partial sequence	0	0
KY817958.1 Aquilaria crassna voucher CS-7 small subunit ribosomal RNA gene partial sequence internal transcribed spacer 1 5.8S ribosomal RNA gene and internal transcribed spacer 2 complete sequence and large subunit ribosomal RNA gene partial sequence	KY817951.1 Aquilaria crassna voucher TP-27 small subunit ribosomal RNA gene partial sequence internal transcribed spacer 1 5.8S ribosomal RNA gene and internal transcribed spacer 2 complete sequence and large subunit ribosomal RNA gene partial sequence	0	0
KY817957.1 Aquilaria crassna voucher CS-6 small subunit ribosomal RNA gene partial sequence internal transcribed spacer 1 5.8S ribosomal RNA gene and internal transcribed spacer 2 complete sequence and large subunit ribosomal RNA gene partial sequence	KY817951.1 Aquilaria crassna voucher TP-27 small subunit ribosomal RNA gene partial sequence internal transcribed spacer 1 5.8S ribosomal RNA gene and internal transcribed spacer 2 complete sequence and large subunit ribosomal RNA gene partial sequence	0	0
KY817953.1 Aquilaria crassna voucher CS-2 small subunit ribosomal RNA gene partial sequence internal transcribed spacer 1 5.8S ribosomal RNA gene and internal transcribed spacer 2 complete sequence and large subunit ribosomal RNA gene partial sequence	KY817951.1 Aquilaria crassna voucher TP-27 small subunit ribosomal RNA gene partial sequence internal transcribed spacer 1 5.8S ribosomal RNA gene and internal transcribed spacer 2 complete sequence and large subunit ribosomal RNA gene partial sequence	0	0
MH134137.1 Aquilaria agallochum internal transcribed spacer 1 partial sequence 5.8S ribosomal RNA gene complete sequence and internal transcribed spacer 2 partial sequence_{aga}	KY817950.1 Aquilaria crassna voucher TP-20 small subunit ribosomal RNA gene partial sequence internal transcribed spacer 1 5.8S ribosomal RNA gene and internal transcribed spacer 2 complete sequence and large subunit ribosomal RNA gene partial sequence	0.0165072	0.0059524
KU879012.1 Aquilaria agallochum 18S ribosomal RNA gene partial sequence internal transcribed spacer 1 5.8S ribosomal RNA gene and internal transcribed spacer 2 complete sequence and 28S ribosomal RNA gene partial sequence_{aga}	KY817950.1 Aquilaria crassna voucher TP-20 small subunit ribosomal RNA gene partial sequence internal transcribed spacer 1 5.8S ribosomal RNA gene and internal transcribed spacer 2 complete sequence and large subunit ribosomal RNA gene partial sequence	0.0221253	0.00719082
MH134138.1 Aquilaria beccariana internal transcribed spacer 1 partial sequence 5.8S ribosomal RNA gene complete sequence and internal transcribed spacer 2 partial sequence_{aga}	KY817950.1 Aquilaria crassna voucher TP-20 small subunit ribosomal RNA gene partial sequence internal transcribed spacer 1 5.8S ribosomal RNA gene and internal transcribed spacer 2 complete sequence and large subunit ribosomal RNA gene partial sequence	0.0220708	0.00727399
KT779116.1 Aquilaria beccariana voucher FBL04001 internal transcribed spacer 1 partial sequence 5.8S ribosomal RNA gene complete sequence and internal transcribed spacer 2 partial sequence_{aga}	KY817950.1 Aquilaria crassna voucher TP-20 small subunit ribosomal RNA gene partial sequence internal transcribed spacer 1 5.8S ribosomal RNA gene and internal transcribed spacer 2 complete sequence and large subunit ribosomal RNA gene partial sequence	0.0421308	0.0101917
KT364477.1 Aquilaria beccariana voucher SFN29381 internal transcribed spacer 1 partial sequence 5.8S ribosomal RNA gene complete sequence and internal transcribed spacer 2 partial sequence_{aga}	KY817950.1 Aquilaria crassna voucher TP-20 small subunit ribosomal RNA gene partial sequence internal transcribed spacer 1 5.8S ribosomal RNA gene and internal transcribed spacer 2 complete sequence and large subunit ribosomal RNA gene partial sequence	0.0221534	0.00722737
KX351419.1 Aquilaria beccariana voucher S1 5.8S ribosomal RNA gene partial sequence internal transcribed spacer 2 complete sequence and large subunit ribosomal RNA gene partial sequence_{aga}	KY817950.1 Aquilaria crassna voucher TP-20 small subunit ribosomal RNA gene partial sequence internal transcribed spacer 1 5.8S ribosomal RNA gene and internal transcribed spacer 2 complete sequence and large subunit ribosomal RNA gene partial sequence	0	0
KX424704.1 Aquilaria beccariana 5.8S ribosomal RNA gene partial sequence internal transcribed spacer 2 complete sequence and 28S ribosomal RNA gene partial sequence_{aga}	KY817950.1 Aquilaria crassna voucher TP-20 small subunit ribosomal RNA gene partial sequence internal transcribed spacer 1 5.8S ribosomal RNA gene and internal transcribed spacer 2 complete sequence and large subunit ribosomal RNA gene partial sequence	0.0438711	0.011062
KU238038.1 Aquilaria crassna voucher FBL G11 WC3 internal transcribed spacer 2 partial sequence	KY817950.1 Aquilaria crassna voucher TP-20 small subunit ribosomal RNA gene partial sequence internal transcribed spacer 1 5.8S ribosomal RNA gene and internal transcribed spacer 2 complete sequence and large subunit ribosomal RNA gene partial sequence	0	0
MH134139.1 Aquilaria crassna internal transcribed spacer 1 partial sequence 5.8S ribosomal RNA gene complete sequence and internal transcribed spacer 2 partial sequence	KY817950.1 Aquilaria crassna voucher TP-20 small subunit ribosomal RNA gene partial sequence internal transcribed spacer 1 5.8S ribosomal RNA gene and internal transcribed spacer 2 complete sequence and large subunit ribosomal RNA gene partial sequence	0	0
KU244111.1 Aquilaria crassna voucher FBL01017 internal transcribed spacer 2 partial sequence	KY817950.1 Aquilaria crassna voucher TP-20 small subunit ribosomal RNA gene partial sequence internal transcribed spacer 1 5.8S ribosomal RNA gene and internal transcribed spacer 2 complete sequence and large subunit ribosomal RNA gene partial sequence	0	0
KU244110.1 Aquilaria crassna voucher FBL01014 internal transcribed spacer 2 partial sequence	KY817950.1 Aquilaria crassna voucher TP-20 small subunit ribosomal RNA gene partial sequence internal transcribed spacer 1 5.8S ribosomal RNA gene and internal transcribed spacer 2 complete sequence and large subunit ribosomal RNA gene partial sequence	0	0
KU244109.1 Aquilaria crassna voucher FBL01013 internal transcribed spacer 2 partial sequence	KY817950.1 Aquilaria crassna voucher TP-20 small subunit ribosomal RNA gene partial sequence internal transcribed spacer 1 5.8S ribosomal RNA gene and internal transcribed spacer 2 complete sequence and large subunit ribosomal RNA gene partial sequence	0	0
KU244108.1 Aquilaria crassna voucher FBL01012 internal transcribed spacer 2 partial sequence	KY817950.1 Aquilaria crassna voucher TP-20 small subunit ribosomal RNA gene partial sequence internal transcribed spacer 1 5.8S ribosomal RNA gene and internal transcribed spacer 2 complete sequence and large subunit ribosomal RNA gene partial sequence	0	0
KU238037.1 Aquilaria crassna voucher FBL G10 WC2 internal transcribed spacer 2 partial sequence	KY817950.1 Aquilaria crassna voucher TP-20 small subunit ribosomal RNA gene partial sequence internal transcribed spacer 1 5.8S ribosomal RNA gene and internal transcribed spacer 2 complete sequence and large subunit ribosomal RNA gene partial sequence	0.0027248	0.00273681
KU238035.1 Aquilaria crassna voucher FBL G04 WC1 internal transcribed spacer 2 partial sequence	KY817950.1 Aquilaria crassna voucher TP-20 small subunit ribosomal RNA gene partial sequence internal transcribed spacer 1 5.8S ribosomal RNA gene and internal transcribed spacer 2 complete sequence and large subunit ribosomal RNA gene partial sequence	0.0027248	0.00273681
KU244085.1 Aquilaria crassna voucher FBL01017 internal transcribed spacer 1 partial sequence 5.8S ribosomal RNA gene complete sequence and internal transcribed spacer 2 partial sequence	KY817950.1 Aquilaria crassna voucher TP-20 small subunit ribosomal RNA gene partial sequence internal transcribed spacer 1 5.8S ribosomal RNA gene and internal transcribed spacer 2 complete sequence and large subunit ribosomal RNA gene partial sequence	0	0
KU244084.1 Aquilaria crassna voucher FBL01014 internal transcribed spacer 1 partial sequence 5.8S ribosomal RNA gene complete sequence and internal transcribed spacer 2 partial sequence	KY817950.1 Aquilaria crassna voucher TP-20 small subunit ribosomal RNA gene partial sequence internal transcribed spacer 1 5.8S ribosomal RNA gene and internal transcribed spacer 2 complete sequence and large subunit ribosomal RNA gene partial sequence	0	0
KU244083.1 Aquilaria crassna voucher FBL01013 internal transcribed spacer 1 partial sequence 5.8S ribosomal RNA gene complete sequence and internal transcribed spacer 2 partial sequence_{cra}	KY817950.1 Aquilaria crassna voucher TP-20 small subunit ribosomal RNA gene partial sequence internal transcribed spacer 1 5.8S ribosomal RNA gene and internal transcribed spacer 2 complete sequence and large subunit ribosomal RNA gene partial sequence	0	0
KU244082.1 Aquilaria crassna voucher FBL01012 internal transcribed spacer 1 partial sequence 5.8S ribosomal RNA gene complete sequence and internal transcribed spacer 2 partial sequence	KY817950.1 Aquilaria crassna voucher TP-20 small subunit ribosomal RNA gene partial sequence internal transcribed spacer 1 5.8S ribosomal RNA gene and internal transcribed spacer 2 complete sequence and large subunit ribosomal RNA gene partial sequence	0	0
KT364478.1 Aquilaria crassna voucher FBL01012 internal transcribed spacer 1 partial sequence 5.8S ribosomal RNA gene complete sequence and internal transcribed spacer 2 partial sequence	KY817950.1 Aquilaria crassna voucher TP-20 small subunit ribosomal RNA gene partial sequence internal transcribed spacer 1 5.8S ribosomal RNA gene and internal transcribed spacer 2 complete sequence and large subunit ribosomal RNA gene partial sequence	0	0
KY817982.1 Aquilaria crassna voucher S-9 small subunit ribosomal RNA gene partial sequence internal transcribed spacer 1 5.8S ribosomal RNA gene and internal transcribed spacer 2 complete sequence and large subunit ribosomal RNA gene partial sequence	KY817950.1 Aquilaria crassna voucher TP-20 small subunit ribosomal RNA gene partial sequence internal transcribed spacer 1 5.8S ribosomal RNA gene and internal transcribed spacer 2 complete sequence and large subunit ribosomal RNA gene partial sequence	0	0
KY817979.1 Aquilaria crassna voucher S-1 small subunit ribosomal RNA gene partial sequence internal transcribed spacer 1 5.8S ribosomal RNA gene and internal transcribed spacer 2 complete sequence and large subunit ribosomal RNA gene partial sequence	KY817950.1 Aquilaria crassna voucher TP-20 small subunit ribosomal RNA gene partial sequence internal transcribed spacer 1 5.8S ribosomal RNA gene and internal transcribed spacer 2 complete sequence and large subunit ribosomal RNA gene partial sequence	0	0
KY817973.1 Aquilaria crassna voucher ML-9 small subunit ribosomal RNA gene partial sequence internal transcribed spacer 1 5.8S ribosomal RNA gene and internal transcribed spacer 2 complete sequence and large subunit ribosomal RNA gene partial sequence	KY817950.1 Aquilaria crassna voucher TP-20 small subunit ribosomal RNA gene partial sequence internal transcribed spacer 1 5.8S ribosomal RNA gene and internal transcribed spacer 2 complete sequence and large subunit ribosomal RNA gene partial sequence	0	0
KY817972.1 Aquilaria crassna voucher ML-8 small subunit ribosomal RNA gene partial sequence internal transcribed spacer 1 5.8S ribosomal RNA gene and internal transcribed spacer 2 complete sequence and large subunit ribosomal RNA gene partial sequence	KY817950.1 Aquilaria crassna voucher TP-20 small subunit ribosomal RNA gene partial sequence internal transcribed spacer 1 5.8S ribosomal RNA gene and internal transcribed spacer 2 complete sequence and large subunit ribosomal RNA gene partial sequence	0	0
KY817971.1 Aquilaria crassna voucher ML-7 small subunit ribosomal RNA gene partial sequence internal transcribed spacer 1 5.8S ribosomal RNA gene and internal transcribed spacer 2 complete sequence and large subunit ribosomal RNA gene partial sequence	KY817950.1 Aquilaria crassna voucher TP-20 small subunit ribosomal RNA gene partial sequence internal transcribed spacer 1 5.8S ribosomal RNA gene and internal transcribed spacer 2 complete sequence and large subunit ribosomal RNA gene partial sequence	0	0
KY817970.1 Aquilaria crassna voucher ML-6 small subunit ribosomal RNA gene partial sequence internal transcribed spacer 1 5.8S ribosomal RNA gene and internal transcribed spacer 2 complete sequence and large subunit ribosomal RNA gene partial sequence	KY817950.1 Aquilaria crassna voucher TP-20 small subunit ribosomal RNA gene partial sequence internal transcribed spacer 1 5.8S ribosomal RNA gene and internal transcribed spacer 2 complete sequence and large subunit ribosomal RNA gene partial sequence	0	0
KY817969.1 Aquilaria crassna voucher ML-5 small subunit ribosomal RNA gene partial sequence internal transcribed spacer 1 5.8S ribosomal RNA gene and internal transcribed spacer 2 complete sequence and large subunit ribosomal RNA gene partial sequence	KY817950.1 Aquilaria crassna voucher TP-20 small subunit ribosomal RNA gene partial sequence internal transcribed spacer 1 5.8S ribosomal RNA gene and internal transcribed spacer 2 complete sequence and large subunit ribosomal RNA gene partial sequence	0	0
KY817968.1 Aquilaria crassna voucher ML-4 small subunit ribosomal RNA gene partial sequence internal transcribed spacer 1 5.8S ribosomal RNA gene and internal transcribed spacer 2 complete sequence and large subunit ribosomal RNA gene partial sequence	KY817950.1 Aquilaria crassna voucher TP-20 small subunit ribosomal RNA gene partial sequence internal transcribed spacer 1 5.8S ribosomal RNA gene and internal transcribed spacer 2 complete sequence and large subunit ribosomal RNA gene partial sequence	0	0
KY817967.1 Aquilaria crassna voucher ML-3 small subunit ribosomal RNA gene partial sequence internal transcribed spacer 1 5.8S ribosomal RNA gene and internal transcribed spacer 2 complete sequence and large subunit ribosomal RNA gene partial sequence	KY817950.1 Aquilaria crassna voucher TP-20 small subunit ribosomal RNA gene partial sequence internal transcribed spacer 1 5.8S ribosomal RNA gene and internal transcribed spacer 2 complete sequence and large subunit ribosomal RNA gene partial sequence	0	0
KY817964.1 Aquilaria crassna voucher CS-13 small subunit ribosomal RNA gene partial sequence internal transcribed spacer 1 5.8S ribosomal RNA gene and internal transcribed spacer 2 complete sequence and large subunit ribosomal RNA gene partial sequence	KY817950.1 Aquilaria crassna voucher TP-20 small subunit ribosomal RNA gene partial sequence internal transcribed spacer 1 5.8S ribosomal RNA gene and internal transcribed spacer 2 complete sequence and large subunit ribosomal RNA gene partial sequence	0	0
KY817963.1 Aquilaria crassna voucher CS-12 small subunit ribosomal RNA gene partial sequence internal transcribed spacer 1 5.8S ribosomal RNA gene and internal transcribed spacer 2 complete sequence and large subunit ribosomal RNA gene partial sequence	KY817950.1 Aquilaria crassna voucher TP-20 small subunit ribosomal RNA gene partial sequence internal transcribed spacer 1 5.8S ribosomal RNA gene and internal transcribed spacer 2 complete sequence and large subunit ribosomal RNA gene partial sequence	0	0
KY817962.1 Aquilaria crassna voucher CS-11 small subunit ribosomal RNA gene partial sequence internal transcribed spacer 1 5.8S ribosomal RNA gene and internal transcribed spacer 2 complete sequence and large subunit ribosomal RNA gene partial sequence	KY817950.1 Aquilaria crassna voucher TP-20 small subunit ribosomal RNA gene partial sequence internal transcribed spacer 1 5.8S ribosomal RNA gene and internal transcribed spacer 2 complete sequence and large subunit ribosomal RNA gene partial sequence	0	0
KY817961.1 Aquilaria crassna voucher CS-10 small subunit ribosomal RNA gene partial sequence internal transcribed spacer 1 5.8S ribosomal RNA gene and internal transcribed spacer 2 complete sequence and large subunit ribosomal RNA gene partial sequence	KY817950.1 Aquilaria crassna voucher TP-20 small subunit ribosomal RNA gene partial sequence internal transcribed spacer 1 5.8S ribosomal RNA gene and internal transcribed spacer 2 complete sequence and large subunit ribosomal RNA gene partial sequence	0	0
KY817959.1 Aquilaria crassna voucher CS-8 small subunit ribosomal RNA gene partial sequence internal transcribed spacer 1 5.8S ribosomal RNA gene and internal transcribed spacer 2 complete sequence and large subunit ribosomal RNA gene partial sequence	KY817950.1 Aquilaria crassna voucher TP-20 small subunit ribosomal RNA gene partial sequence internal transcribed spacer 1 5.8S ribosomal RNA gene and internal transcribed spacer 2 complete sequence and large subunit ribosomal RNA gene partial sequence	0	0
KY817958.1 Aquilaria crassna voucher CS-7 small subunit ribosomal RNA gene partial sequence internal transcribed spacer 1 5.8S ribosomal RNA gene and internal transcribed spacer 2 complete sequence and large subunit ribosomal RNA gene partial sequence	KY817950.1 Aquilaria crassna voucher TP-20 small subunit ribosomal RNA gene partial sequence internal transcribed spacer 1 5.8S ribosomal RNA gene and internal transcribed spacer 2 complete sequence and large subunit ribosomal RNA gene partial sequence	0	0
KY817957.1 Aquilaria crassna voucher CS-6 small subunit ribosomal RNA gene partial sequence internal transcribed spacer 1 5.8S ribosomal RNA gene and internal transcribed spacer 2 complete sequence and large subunit ribosomal RNA gene partial sequence	KY817950.1 Aquilaria crassna voucher TP-20 small subunit ribosomal RNA gene partial sequence internal transcribed spacer 1 5.8S ribosomal RNA gene and internal transcribed spacer 2 complete sequence and large subunit ribosomal RNA gene partial sequence	0	0
KY817953.1 Aquilaria crassna voucher CS-2 small subunit ribosomal RNA gene partial sequence internal transcribed spacer 1 5.8S ribosomal RNA gene and internal transcribed spacer 2 complete sequence and large subunit ribosomal RNA gene partial sequence	KY817950.1 Aquilaria crassna voucher TP-20 small subunit ribosomal RNA gene partial sequence internal transcribed spacer 1 5.8S ribosomal RNA gene and internal transcribed spacer 2 complete sequence and large subunit ribosomal RNA gene partial sequence	0	0
KY817951.1 Aquilaria crassna voucher TP-27 small subunit ribosomal RNA gene partial sequence internal transcribed spacer 1 5.8S ribosomal RNA gene and internal transcribed spacer 2 complete sequence and large subunit ribosomal RNA gene partial sequence	KY817950.1 Aquilaria crassna voucher TP-20 small subunit ribosomal RNA gene partial sequence internal transcribed spacer 1 5.8S ribosomal RNA gene and internal transcribed spacer 2 complete sequence and large subunit ribosomal RNA gene partial sequence	0	0
MH134137.1 Aquilaria agallochum internal transcribed spacer 1 partial sequence 5.8S ribosomal RNA gene complete sequence and internal transcribed spacer 2 partial sequence_{aga}	KY817949.1 Aquilaria crassna voucher TP-19 small subunit ribosomal RNA gene partial sequence internal transcribed spacer 1 5.8S ribosomal RNA gene and internal transcribed spacer 2 complete sequence and large subunit ribosomal RNA gene partial sequence	0.0165072	0.0059524
KU879012.1 Aquilaria agallochum 18S ribosomal RNA gene partial sequence internal transcribed spacer 1 5.8S ribosomal RNA gene and internal transcribed spacer 2 complete sequence and 28S ribosomal RNA gene partial sequence_{aga}	KY817949.1 Aquilaria crassna voucher TP-19 small subunit ribosomal RNA gene partial sequence internal transcribed spacer 1 5.8S ribosomal RNA gene and internal transcribed spacer 2 complete sequence and large subunit ribosomal RNA gene partial sequence	0.0221253	0.00719082
MH134138.1 Aquilaria beccariana internal transcribed spacer 1 partial sequence 5.8S ribosomal RNA gene complete sequence and internal transcribed spacer 2 partial sequence_{aga}	KY817949.1 Aquilaria crassna voucher TP-19 small subunit ribosomal RNA gene partial sequence internal transcribed spacer 1 5.8S ribosomal RNA gene and internal transcribed spacer 2 complete sequence and large subunit ribosomal RNA gene partial sequence	0.0220708	0.00727399
KT779116.1 Aquilaria beccariana voucher FBL04001 internal transcribed spacer 1 partial sequence 5.8S ribosomal RNA gene complete sequence and internal transcribed spacer 2 partial sequence_{aga}	KY817949.1 Aquilaria crassna voucher TP-19 small subunit ribosomal RNA gene partial sequence internal transcribed spacer 1 5.8S ribosomal RNA gene and internal transcribed spacer 2 complete sequence and large subunit ribosomal RNA gene partial sequence	0.0421308	0.0101917
KT364477.1 Aquilaria beccariana voucher SFN29381 internal transcribed spacer 1 partial sequence 5.8S ribosomal RNA gene complete sequence and internal transcribed spacer 2 partial sequence_{aga}	KY817949.1 Aquilaria crassna voucher TP-19 small subunit ribosomal RNA gene partial sequence internal transcribed spacer 1 5.8S ribosomal RNA gene and internal transcribed spacer 2 complete sequence and large subunit ribosomal RNA gene partial sequence	0.0221534	0.00722737
KX351419.1 Aquilaria beccariana voucher S1 5.8S ribosomal RNA gene partial sequence internal transcribed spacer 2 complete sequence and large subunit ribosomal RNA gene partial sequence_{aga}	KY817949.1 Aquilaria crassna voucher TP-19 small subunit ribosomal RNA gene partial sequence internal transcribed spacer 1 5.8S ribosomal RNA gene and internal transcribed spacer 2 complete sequence and large subunit ribosomal RNA gene partial sequence	0	0
KX424704.1 Aquilaria beccariana 5.8S ribosomal RNA gene partial sequence internal transcribed spacer 2 complete sequence and 28S ribosomal RNA gene partial sequence_{aga}	KY817949.1 Aquilaria crassna voucher TP-19 small subunit ribosomal RNA gene partial sequence internal transcribed spacer 1 5.8S ribosomal RNA gene and internal transcribed spacer 2 complete sequence and large subunit ribosomal RNA gene partial sequence	0.0438711	0.011062
KU238038.1 Aquilaria crassna voucher FBL G11 WC3 internal transcribed spacer 2 partial sequence	KY817949.1 Aquilaria crassna voucher TP-19 small subunit ribosomal RNA gene partial sequence internal transcribed spacer 1 5.8S ribosomal RNA gene and internal transcribed spacer 2 complete sequence and large subunit ribosomal RNA gene partial sequence	0	0
MH134139.1 Aquilaria crassna internal transcribed spacer 1 partial sequence 5.8S ribosomal RNA gene complete sequence and internal transcribed spacer 2 partial sequence	KY817949.1 Aquilaria crassna voucher TP-19 small subunit ribosomal RNA gene partial sequence internal transcribed spacer 1 5.8S ribosomal RNA gene and internal transcribed spacer 2 complete sequence and large subunit ribosomal RNA gene partial sequence	0	0
KU244111.1 Aquilaria crassna voucher FBL01017 internal transcribed spacer 2 partial sequence	KY817949.1 Aquilaria crassna voucher TP-19 small subunit ribosomal RNA gene partial sequence internal transcribed spacer 1 5.8S ribosomal RNA gene and internal transcribed spacer 2 complete sequence and large subunit ribosomal RNA gene partial sequence	0	0
KU244110.1 Aquilaria crassna voucher FBL01014 internal transcribed spacer 2 partial sequence	KY817949.1 Aquilaria crassna voucher TP-19 small subunit ribosomal RNA gene partial sequence internal transcribed spacer 1 5.8S ribosomal RNA gene and internal transcribed spacer 2 complete sequence and large subunit ribosomal RNA gene partial sequence	0	0
KU244109.1 Aquilaria crassna voucher FBL01013 internal transcribed spacer 2 partial sequence	KY817949.1 Aquilaria crassna voucher TP-19 small subunit ribosomal RNA gene partial sequence internal transcribed spacer 1 5.8S ribosomal RNA gene and internal transcribed spacer 2 complete sequence and large subunit ribosomal RNA gene partial sequence	0	0
KU244108.1 Aquilaria crassna voucher FBL01012 internal transcribed spacer 2 partial sequence	KY817949.1 Aquilaria crassna voucher TP-19 small subunit ribosomal RNA gene partial sequence internal transcribed spacer 1 5.8S ribosomal RNA gene and internal transcribed spacer 2 complete sequence and large subunit ribosomal RNA gene partial sequence	0	0
KU238037.1 Aquilaria crassna voucher FBL G10 WC2 internal transcribed spacer 2 partial sequence	KY817949.1 Aquilaria crassna voucher TP-19 small subunit ribosomal RNA gene partial sequence internal transcribed spacer 1 5.8S ribosomal RNA gene and internal transcribed spacer 2 complete sequence and large subunit ribosomal RNA gene partial sequence	0.0027248	0.00273681
KU238035.1 Aquilaria crassna voucher FBL G04 WC1 internal transcribed spacer 2 partial sequence	KY817949.1 Aquilaria crassna voucher TP-19 small subunit ribosomal RNA gene partial sequence internal transcribed spacer 1 5.8S ribosomal RNA gene and internal transcribed spacer 2 complete sequence and large subunit ribosomal RNA gene partial sequence	0.0027248	0.00273681
KU244085.1 Aquilaria crassna voucher FBL01017 internal transcribed spacer 1 partial sequence 5.8S ribosomal RNA gene complete sequence and internal transcribed spacer 2 partial sequence	KY817949.1 Aquilaria crassna voucher TP-19 small subunit ribosomal RNA gene partial sequence internal transcribed spacer 1 5.8S ribosomal RNA gene and internal transcribed spacer 2 complete sequence and large subunit ribosomal RNA gene partial sequence	0	0
KU244084.1 Aquilaria crassna voucher FBL01014 internal transcribed spacer 1 partial sequence 5.8S ribosomal RNA gene complete sequence and internal transcribed spacer 2 partial sequence	KY817949.1 Aquilaria crassna voucher TP-19 small subunit ribosomal RNA gene partial sequence internal transcribed spacer 1 5.8S ribosomal RNA gene and internal transcribed spacer 2 complete sequence and large subunit ribosomal RNA gene partial sequence	0	0
KU244083.1 Aquilaria crassna voucher FBL01013 internal transcribed spacer 1 partial sequence 5.8S ribosomal RNA gene complete sequence and internal transcribed spacer 2 partial sequence_{cra}	KY817949.1 Aquilaria crassna voucher TP-19 small subunit ribosomal RNA gene partial sequence internal transcribed spacer 1 5.8S ribosomal RNA gene and internal transcribed spacer 2 complete sequence and large subunit ribosomal RNA gene partial sequence	0	0
KU244082.1 Aquilaria crassna voucher FBL01012 internal transcribed spacer 1 partial sequence 5.8S ribosomal RNA gene complete sequence and internal transcribed spacer 2 partial sequence	KY817949.1 Aquilaria crassna voucher TP-19 small subunit ribosomal RNA gene partial sequence internal transcribed spacer 1 5.8S ribosomal RNA gene and internal transcribed spacer 2 complete sequence and large subunit ribosomal RNA gene partial sequence	0	0
KT364478.1 Aquilaria crassna voucher FBL01012 internal transcribed spacer 1 partial sequence 5.8S ribosomal RNA gene complete sequence and internal transcribed spacer 2 partial sequence	KY817949.1 Aquilaria crassna voucher TP-19 small subunit ribosomal RNA gene partial sequence internal transcribed spacer 1 5.8S ribosomal RNA gene and internal transcribed spacer 2 complete sequence and large subunit ribosomal RNA gene partial sequence	0	0
KY817982.1 Aquilaria crassna voucher S-9 small subunit ribosomal RNA gene partial sequence internal transcribed spacer 1 5.8S ribosomal RNA gene and internal transcribed spacer 2 complete sequence and large subunit ribosomal RNA gene partial sequence	KY817949.1 Aquilaria crassna voucher TP-19 small subunit ribosomal RNA gene partial sequence internal transcribed spacer 1 5.8S ribosomal RNA gene and internal transcribed spacer 2 complete sequence and large subunit ribosomal RNA gene partial sequence	0	0
KY817979.1 Aquilaria crassna voucher S-1 small subunit ribosomal RNA gene partial sequence internal transcribed spacer 1 5.8S ribosomal RNA gene and internal transcribed spacer 2 complete sequence and large subunit ribosomal RNA gene partial sequence	KY817949.1 Aquilaria crassna voucher TP-19 small subunit ribosomal RNA gene partial sequence internal transcribed spacer 1 5.8S ribosomal RNA gene and internal transcribed spacer 2 complete sequence and large subunit ribosomal RNA gene partial sequence	0	0
KY817973.1 Aquilaria crassna voucher ML-9 small subunit ribosomal RNA gene partial sequence internal transcribed spacer 1 5.8S ribosomal RNA gene and internal transcribed spacer 2 complete sequence and large subunit ribosomal RNA gene partial sequence	KY817949.1 Aquilaria crassna voucher TP-19 small subunit ribosomal RNA gene partial sequence internal transcribed spacer 1 5.8S ribosomal RNA gene and internal transcribed spacer 2 complete sequence and large subunit ribosomal RNA gene partial sequence	0	0
KY817972.1 Aquilaria crassna voucher ML-8 small subunit ribosomal RNA gene partial sequence internal transcribed spacer 1 5.8S ribosomal RNA gene and internal transcribed spacer 2 complete sequence and large subunit ribosomal RNA gene partial sequence	KY817949.1 Aquilaria crassna voucher TP-19 small subunit ribosomal RNA gene partial sequence internal transcribed spacer 1 5.8S ribosomal RNA gene and internal transcribed spacer 2 complete sequence and large subunit ribosomal RNA gene partial sequence	0	0
KY817971.1 Aquilaria crassna voucher ML-7 small subunit ribosomal RNA gene partial sequence internal transcribed spacer 1 5.8S ribosomal RNA gene and internal transcribed spacer 2 complete sequence and large subunit ribosomal RNA gene partial sequence	KY817949.1 Aquilaria crassna voucher TP-19 small subunit ribosomal RNA gene partial sequence internal transcribed spacer 1 5.8S ribosomal RNA gene and internal transcribed spacer 2 complete sequence and large subunit ribosomal RNA gene partial sequence	0	0
KY817970.1 Aquilaria crassna voucher ML-6 small subunit ribosomal RNA gene partial sequence internal transcribed spacer 1 5.8S ribosomal RNA gene and internal transcribed spacer 2 complete sequence and large subunit ribosomal RNA gene partial sequence	KY817949.1 Aquilaria crassna voucher TP-19 small subunit ribosomal RNA gene partial sequence internal transcribed spacer 1 5.8S ribosomal RNA gene and internal transcribed spacer 2 complete sequence and large subunit ribosomal RNA gene partial sequence	0	0
KY817969.1 Aquilaria crassna voucher ML-5 small subunit ribosomal RNA gene partial sequence internal transcribed spacer 1 5.8S ribosomal RNA gene and internal transcribed spacer 2 complete sequence and large subunit ribosomal RNA gene partial sequence	KY817949.1 Aquilaria crassna voucher TP-19 small subunit ribosomal RNA gene partial sequence internal transcribed spacer 1 5.8S ribosomal RNA gene and internal transcribed spacer 2 complete sequence and large subunit ribosomal RNA gene partial sequence	0	0
KY817968.1 Aquilaria crassna voucher ML-4 small subunit ribosomal RNA gene partial sequence internal transcribed spacer 1 5.8S ribosomal RNA gene and internal transcribed spacer 2 complete sequence and large subunit ribosomal RNA gene partial sequence	KY817949.1 Aquilaria crassna voucher TP-19 small subunit ribosomal RNA gene partial sequence internal transcribed spacer 1 5.8S ribosomal RNA gene and internal transcribed spacer 2 complete sequence and large subunit ribosomal RNA gene partial sequence	0	0
KY817967.1 Aquilaria crassna voucher ML-3 small subunit ribosomal RNA gene partial sequence internal transcribed spacer 1 5.8S ribosomal RNA gene and internal transcribed spacer 2 complete sequence and large subunit ribosomal RNA gene partial sequence	KY817949.1 Aquilaria crassna voucher TP-19 small subunit ribosomal RNA gene partial sequence internal transcribed spacer 1 5.8S ribosomal RNA gene and internal transcribed spacer 2 complete sequence and large subunit ribosomal RNA gene partial sequence	0	0
KY817964.1 Aquilaria crassna voucher CS-13 small subunit ribosomal RNA gene partial sequence internal transcribed spacer 1 5.8S ribosomal RNA gene and internal transcribed spacer 2 complete sequence and large subunit ribosomal RNA gene partial sequence	KY817949.1 Aquilaria crassna voucher TP-19 small subunit ribosomal RNA gene partial sequence internal transcribed spacer 1 5.8S ribosomal RNA gene and internal transcribed spacer 2 complete sequence and large subunit ribosomal RNA gene partial sequence	0	0
KY817963.1 Aquilaria crassna voucher CS-12 small subunit ribosomal RNA gene partial sequence internal transcribed spacer 1 5.8S ribosomal RNA gene and internal transcribed spacer 2 complete sequence and large subunit ribosomal RNA gene partial sequence	KY817949.1 Aquilaria crassna voucher TP-19 small subunit ribosomal RNA gene partial sequence internal transcribed spacer 1 5.8S ribosomal RNA gene and internal transcribed spacer 2 complete sequence and large subunit ribosomal RNA gene partial sequence	0	0
KY817962.1 Aquilaria crassna voucher CS-11 small subunit ribosomal RNA gene partial sequence internal transcribed spacer 1 5.8S ribosomal RNA gene and internal transcribed spacer 2 complete sequence and large subunit ribosomal RNA gene partial sequence	KY817949.1 Aquilaria crassna voucher TP-19 small subunit ribosomal RNA gene partial sequence internal transcribed spacer 1 5.8S ribosomal RNA gene and internal transcribed spacer 2 complete sequence and large subunit ribosomal RNA gene partial sequence	0	0
KY817961.1 Aquilaria crassna voucher CS-10 small subunit ribosomal RNA gene partial sequence internal transcribed spacer 1 5.8S ribosomal RNA gene and internal transcribed spacer 2 complete sequence and large subunit ribosomal RNA gene partial sequence	KY817949.1 Aquilaria crassna voucher TP-19 small subunit ribosomal RNA gene partial sequence internal transcribed spacer 1 5.8S ribosomal RNA gene and internal transcribed spacer 2 complete sequence and large subunit ribosomal RNA gene partial sequence	0	0
KY817959.1 Aquilaria crassna voucher CS-8 small subunit ribosomal RNA gene partial sequence internal transcribed spacer 1 5.8S ribosomal RNA gene and internal transcribed spacer 2 complete sequence and large subunit ribosomal RNA gene partial sequence	KY817949.1 Aquilaria crassna voucher TP-19 small subunit ribosomal RNA gene partial sequence internal transcribed spacer 1 5.8S ribosomal RNA gene and internal transcribed spacer 2 complete sequence and large subunit ribosomal RNA gene partial sequence	0	0
KY817958.1 Aquilaria crassna voucher CS-7 small subunit ribosomal RNA gene partial sequence internal transcribed spacer 1 5.8S ribosomal RNA gene and internal transcribed spacer 2 complete sequence and large subunit ribosomal RNA gene partial sequence	KY817949.1 Aquilaria crassna voucher TP-19 small subunit ribosomal RNA gene partial sequence internal transcribed spacer 1 5.8S ribosomal RNA gene and internal transcribed spacer 2 complete sequence and large subunit ribosomal RNA gene partial sequence	0	0
KY817957.1 Aquilaria crassna voucher CS-6 small subunit ribosomal RNA gene partial sequence internal transcribed spacer 1 5.8S ribosomal RNA gene and internal transcribed spacer 2 complete sequence and large subunit ribosomal RNA gene partial sequence	KY817949.1 Aquilaria crassna voucher TP-19 small subunit ribosomal RNA gene partial sequence internal transcribed spacer 1 5.8S ribosomal RNA gene and internal transcribed spacer 2 complete sequence and large subunit ribosomal RNA gene partial sequence	0	0
KY817953.1 Aquilaria crassna voucher CS-2 small subunit ribosomal RNA gene partial sequence internal transcribed spacer 1 5.8S ribosomal RNA gene and internal transcribed spacer 2 complete sequence and large subunit ribosomal RNA gene partial sequence	KY817949.1 Aquilaria crassna voucher TP-19 small subunit ribosomal RNA gene partial sequence internal transcribed spacer 1 5.8S ribosomal RNA gene and internal transcribed spacer 2 complete sequence and large subunit ribosomal RNA gene partial sequence	0	0
KY817951.1 Aquilaria crassna voucher TP-27 small subunit ribosomal RNA gene partial sequence internal transcribed spacer 1 5.8S ribosomal RNA gene and internal transcribed spacer 2 complete sequence and large subunit ribosomal RNA gene partial sequence	KY817949.1 Aquilaria crassna voucher TP-19 small subunit ribosomal RNA gene partial sequence internal transcribed spacer 1 5.8S ribosomal RNA gene and internal transcribed spacer 2 complete sequence and large subunit ribosomal RNA gene partial sequence	0	0
KY817950.1 Aquilaria crassna voucher TP-20 small subunit ribosomal RNA gene partial sequence internal transcribed spacer 1 5.8S ribosomal RNA gene and internal transcribed spacer 2 complete sequence and large subunit ribosomal RNA gene partial sequence	KY817949.1 Aquilaria crassna voucher TP-19 small subunit ribosomal RNA gene partial sequence internal transcribed spacer 1 5.8S ribosomal RNA gene and internal transcribed spacer 2 complete sequence and large subunit ribosomal RNA gene partial sequence	0	0
MH134137.1 Aquilaria agallochum internal transcribed spacer 1 partial sequence 5.8S ribosomal RNA gene complete sequence and internal transcribed spacer 2 partial sequence_{aga}	KY817948.1 Aquilaria crassna voucher TP-15 small subunit ribosomal RNA gene partial sequence internal transcribed spacer 1 5.8S ribosomal RNA gene and internal transcribed spacer 2 complete sequence and large subunit ribosomal RNA gene partial sequence	0.0165072	0.0059524
KU879012.1 Aquilaria agallochum 18S ribosomal RNA gene partial sequence internal transcribed spacer 1 5.8S ribosomal RNA gene and internal transcribed spacer 2 complete sequence and 28S ribosomal RNA gene partial sequence_{aga}	KY817948.1 Aquilaria crassna voucher TP-15 small subunit ribosomal RNA gene partial sequence internal transcribed spacer 1 5.8S ribosomal RNA gene and internal transcribed spacer 2 complete sequence and large subunit ribosomal RNA gene partial sequence	0.0221253	0.00719082
MH134138.1 Aquilaria beccariana internal transcribed spacer 1 partial sequence 5.8S ribosomal RNA gene complete sequence and internal transcribed spacer 2 partial sequence_{aga}	KY817948.1 Aquilaria crassna voucher TP-15 small subunit ribosomal RNA gene partial sequence internal transcribed spacer 1 5.8S ribosomal RNA gene and internal transcribed spacer 2 complete sequence and large subunit ribosomal RNA gene partial sequence	0.0220708	0.00727399
KT779116.1 Aquilaria beccariana voucher FBL04001 internal transcribed spacer 1 partial sequence 5.8S ribosomal RNA gene complete sequence and internal transcribed spacer 2 partial sequence_{aga}	KY817948.1 Aquilaria crassna voucher TP-15 small subunit ribosomal RNA gene partial sequence internal transcribed spacer 1 5.8S ribosomal RNA gene and internal transcribed spacer 2 complete sequence and large subunit ribosomal RNA gene partial sequence	0.0421308	0.0101917
KT364477.1 Aquilaria beccariana voucher SFN29381 internal transcribed spacer 1 partial sequence 5.8S ribosomal RNA gene complete sequence and internal transcribed spacer 2 partial sequence_{aga}	KY817948.1 Aquilaria crassna voucher TP-15 small subunit ribosomal RNA gene partial sequence internal transcribed spacer 1 5.8S ribosomal RNA gene and internal transcribed spacer 2 complete sequence and large subunit ribosomal RNA gene partial sequence	0.0221534	0.00722737
KX351419.1 Aquilaria beccariana voucher S1 5.8S ribosomal RNA gene partial sequence internal transcribed spacer 2 complete sequence and large subunit ribosomal RNA gene partial sequence_{aga}	KY817948.1 Aquilaria crassna voucher TP-15 small subunit ribosomal RNA gene partial sequence internal transcribed spacer 1 5.8S ribosomal RNA gene and internal transcribed spacer 2 complete sequence and large subunit ribosomal RNA gene partial sequence	0	0
KX424704.1 Aquilaria beccariana 5.8S ribosomal RNA gene partial sequence internal transcribed spacer 2 complete sequence and 28S ribosomal RNA gene partial sequence_{aga}	KY817948.1 Aquilaria crassna voucher TP-15 small subunit ribosomal RNA gene partial sequence internal transcribed spacer 1 5.8S ribosomal RNA gene and internal transcribed spacer 2 complete sequence and large subunit ribosomal RNA gene partial sequence	0.0438711	0.011062
KU238038.1 Aquilaria crassna voucher FBL G11 WC3 internal transcribed spacer 2 partial sequence	KY817948.1 Aquilaria crassna voucher TP-15 small subunit ribosomal RNA gene partial sequence internal transcribed spacer 1 5.8S ribosomal RNA gene and internal transcribed spacer 2 complete sequence and large subunit ribosomal RNA gene partial sequence	0	0
MH134139.1 Aquilaria crassna internal transcribed spacer 1 partial sequence 5.8S ribosomal RNA gene complete sequence and internal transcribed spacer 2 partial sequence	KY817948.1 Aquilaria crassna voucher TP-15 small subunit ribosomal RNA gene partial sequence internal transcribed spacer 1 5.8S ribosomal RNA gene and internal transcribed spacer 2 complete sequence and large subunit ribosomal RNA gene partial sequence	0	0
KU244111.1 Aquilaria crassna voucher FBL01017 internal transcribed spacer 2 partial sequence	KY817948.1 Aquilaria crassna voucher TP-15 small subunit ribosomal RNA gene partial sequence internal transcribed spacer 1 5.8S ribosomal RNA gene and internal transcribed spacer 2 complete sequence and large subunit ribosomal RNA gene partial sequence	0	0
KU244110.1 Aquilaria crassna voucher FBL01014 internal transcribed spacer 2 partial sequence	KY817948.1 Aquilaria crassna voucher TP-15 small subunit ribosomal RNA gene partial sequence internal transcribed spacer 1 5.8S ribosomal RNA gene and internal transcribed spacer 2 complete sequence and large subunit ribosomal RNA gene partial sequence	0	0
KU244109.1 Aquilaria crassna voucher FBL01013 internal transcribed spacer 2 partial sequence	KY817948.1 Aquilaria crassna voucher TP-15 small subunit ribosomal RNA gene partial sequence internal transcribed spacer 1 5.8S ribosomal RNA gene and internal transcribed spacer 2 complete sequence and large subunit ribosomal RNA gene partial sequence	0	0
KU244108.1 Aquilaria crassna voucher FBL01012 internal transcribed spacer 2 partial sequence	KY817948.1 Aquilaria crassna voucher TP-15 small subunit ribosomal RNA gene partial sequence internal transcribed spacer 1 5.8S ribosomal RNA gene and internal transcribed spacer 2 complete sequence and large subunit ribosomal RNA gene partial sequence	0	0
KU238037.1 Aquilaria crassna voucher FBL G10 WC2 internal transcribed spacer 2 partial sequence	KY817948.1 Aquilaria crassna voucher TP-15 small subunit ribosomal RNA gene partial sequence internal transcribed spacer 1 5.8S ribosomal RNA gene and internal transcribed spacer 2 complete sequence and large subunit ribosomal RNA gene partial sequence	0.0027248	0.00273681
KU238035.1 Aquilaria crassna voucher FBL G04 WC1 internal transcribed spacer 2 partial sequence	KY817948.1 Aquilaria crassna voucher TP-15 small subunit ribosomal RNA gene partial sequence internal transcribed spacer 1 5.8S ribosomal RNA gene and internal transcribed spacer 2 complete sequence and large subunit ribosomal RNA gene partial sequence	0.0027248	0.00273681
KU244085.1 Aquilaria crassna voucher FBL01017 internal transcribed spacer 1 partial sequence 5.8S ribosomal RNA gene complete sequence and internal transcribed spacer 2 partial sequence	KY817948.1 Aquilaria crassna voucher TP-15 small subunit ribosomal RNA gene partial sequence internal transcribed spacer 1 5.8S ribosomal RNA gene and internal transcribed spacer 2 complete sequence and large subunit ribosomal RNA gene partial sequence	0	0
KU244084.1 Aquilaria crassna voucher FBL01014 internal transcribed spacer 1 partial sequence 5.8S ribosomal RNA gene complete sequence and internal transcribed spacer 2 partial sequence	KY817948.1 Aquilaria crassna voucher TP-15 small subunit ribosomal RNA gene partial sequence internal transcribed spacer 1 5.8S ribosomal RNA gene and internal transcribed spacer 2 complete sequence and large subunit ribosomal RNA gene partial sequence	0	0
KU244083.1 Aquilaria crassna voucher FBL01013 internal transcribed spacer 1 partial sequence 5.8S ribosomal RNA gene complete sequence and internal transcribed spacer 2 partial sequence_{cra}	KY817948.1 Aquilaria crassna voucher TP-15 small subunit ribosomal RNA gene partial sequence internal transcribed spacer 1 5.8S ribosomal RNA gene and internal transcribed spacer 2 complete sequence and large subunit ribosomal RNA gene partial sequence	0	0
KU244082.1 Aquilaria crassna voucher FBL01012 internal transcribed spacer 1 partial sequence 5.8S ribosomal RNA gene complete sequence and internal transcribed spacer 2 partial sequence	KY817948.1 Aquilaria crassna voucher TP-15 small subunit ribosomal RNA gene partial sequence internal transcribed spacer 1 5.8S ribosomal RNA gene and internal transcribed spacer 2 complete sequence and large subunit ribosomal RNA gene partial sequence	0	0
KT364478.1 Aquilaria crassna voucher FBL01012 internal transcribed spacer 1 partial sequence 5.8S ribosomal RNA gene complete sequence and internal transcribed spacer 2 partial sequence	KY817948.1 Aquilaria crassna voucher TP-15 small subunit ribosomal RNA gene partial sequence internal transcribed spacer 1 5.8S ribosomal RNA gene and internal transcribed spacer 2 complete sequence and large subunit ribosomal RNA gene partial sequence	0	0
KY817982.1 Aquilaria crassna voucher S-9 small subunit ribosomal RNA gene partial sequence internal transcribed spacer 1 5.8S ribosomal RNA gene and internal transcribed spacer 2 complete sequence and large subunit ribosomal RNA gene partial sequence	KY817948.1 Aquilaria crassna voucher TP-15 small subunit ribosomal RNA gene partial sequence internal transcribed spacer 1 5.8S ribosomal RNA gene and internal transcribed spacer 2 complete sequence and large subunit ribosomal RNA gene partial sequence	0	0
KY817979.1 Aquilaria crassna voucher S-1 small subunit ribosomal RNA gene partial sequence internal transcribed spacer 1 5.8S ribosomal RNA gene and internal transcribed spacer 2 complete sequence and large subunit ribosomal RNA gene partial sequence	KY817948.1 Aquilaria crassna voucher TP-15 small subunit ribosomal RNA gene partial sequence internal transcribed spacer 1 5.8S ribosomal RNA gene and internal transcribed spacer 2 complete sequence and large subunit ribosomal RNA gene partial sequence	0	0
KY817973.1 Aquilaria crassna voucher ML-9 small subunit ribosomal RNA gene partial sequence internal transcribed spacer 1 5.8S ribosomal RNA gene and internal transcribed spacer 2 complete sequence and large subunit ribosomal RNA gene partial sequence	KY817948.1 Aquilaria crassna voucher TP-15 small subunit ribosomal RNA gene partial sequence internal transcribed spacer 1 5.8S ribosomal RNA gene and internal transcribed spacer 2 complete sequence and large subunit ribosomal RNA gene partial sequence	0	0
KY817972.1 Aquilaria crassna voucher ML-8 small subunit ribosomal RNA gene partial sequence internal transcribed spacer 1 5.8S ribosomal RNA gene and internal transcribed spacer 2 complete sequence and large subunit ribosomal RNA gene partial sequence	KY817948.1 Aquilaria crassna voucher TP-15 small subunit ribosomal RNA gene partial sequence internal transcribed spacer 1 5.8S ribosomal RNA gene and internal transcribed spacer 2 complete sequence and large subunit ribosomal RNA gene partial sequence	0	0
KY817971.1 Aquilaria crassna voucher ML-7 small subunit ribosomal RNA gene partial sequence internal transcribed spacer 1 5.8S ribosomal RNA gene and internal transcribed spacer 2 complete sequence and large subunit ribosomal RNA gene partial sequence	KY817948.1 Aquilaria crassna voucher TP-15 small subunit ribosomal RNA gene partial sequence internal transcribed spacer 1 5.8S ribosomal RNA gene and internal transcribed spacer 2 complete sequence and large subunit ribosomal RNA gene partial sequence	0	0
KY817970.1 Aquilaria crassna voucher ML-6 small subunit ribosomal RNA gene partial sequence internal transcribed spacer 1 5.8S ribosomal RNA gene and internal transcribed spacer 2 complete sequence and large subunit ribosomal RNA gene partial sequence	KY817948.1 Aquilaria crassna voucher TP-15 small subunit ribosomal RNA gene partial sequence internal transcribed spacer 1 5.8S ribosomal RNA gene and internal transcribed spacer 2 complete sequence and large subunit ribosomal RNA gene partial sequence	0	0
KY817969.1 Aquilaria crassna voucher ML-5 small subunit ribosomal RNA gene partial sequence internal transcribed spacer 1 5.8S ribosomal RNA gene and internal transcribed spacer 2 complete sequence and large subunit ribosomal RNA gene partial sequence	KY817948.1 Aquilaria crassna voucher TP-15 small subunit ribosomal RNA gene partial sequence internal transcribed spacer 1 5.8S ribosomal RNA gene and internal transcribed spacer 2 complete sequence and large subunit ribosomal RNA gene partial sequence	0	0
KY817968.1 Aquilaria crassna voucher ML-4 small subunit ribosomal RNA gene partial sequence internal transcribed spacer 1 5.8S ribosomal RNA gene and internal transcribed spacer 2 complete sequence and large subunit ribosomal RNA gene partial sequence	KY817948.1 Aquilaria crassna voucher TP-15 small subunit ribosomal RNA gene partial sequence internal transcribed spacer 1 5.8S ribosomal RNA gene and internal transcribed spacer 2 complete sequence and large subunit ribosomal RNA gene partial sequence	0	0
KY817967.1 Aquilaria crassna voucher ML-3 small subunit ribosomal RNA gene partial sequence internal transcribed spacer 1 5.8S ribosomal RNA gene and internal transcribed spacer 2 complete sequence and large subunit ribosomal RNA gene partial sequence	KY817948.1 Aquilaria crassna voucher TP-15 small subunit ribosomal RNA gene partial sequence internal transcribed spacer 1 5.8S ribosomal RNA gene and internal transcribed spacer 2 complete sequence and large subunit ribosomal RNA gene partial sequence	0	0
KY817964.1 Aquilaria crassna voucher CS-13 small subunit ribosomal RNA gene partial sequence internal transcribed spacer 1 5.8S ribosomal RNA gene and internal transcribed spacer 2 complete sequence and large subunit ribosomal RNA gene partial sequence	KY817948.1 Aquilaria crassna voucher TP-15 small subunit ribosomal RNA gene partial sequence internal transcribed spacer 1 5.8S ribosomal RNA gene and internal transcribed spacer 2 complete sequence and large subunit ribosomal RNA gene partial sequence	0	0
KY817963.1 Aquilaria crassna voucher CS-12 small subunit ribosomal RNA gene partial sequence internal transcribed spacer 1 5.8S ribosomal RNA gene and internal transcribed spacer 2 complete sequence and large subunit ribosomal RNA gene partial sequence	KY817948.1 Aquilaria crassna voucher TP-15 small subunit ribosomal RNA gene partial sequence internal transcribed spacer 1 5.8S ribosomal RNA gene and internal transcribed spacer 2 complete sequence and large subunit ribosomal RNA gene partial sequence	0	0
KY817962.1 Aquilaria crassna voucher CS-11 small subunit ribosomal RNA gene partial sequence internal transcribed spacer 1 5.8S ribosomal RNA gene and internal transcribed spacer 2 complete sequence and large subunit ribosomal RNA gene partial sequence	KY817948.1 Aquilaria crassna voucher TP-15 small subunit ribosomal RNA gene partial sequence internal transcribed spacer 1 5.8S ribosomal RNA gene and internal transcribed spacer 2 complete sequence and large subunit ribosomal RNA gene partial sequence	0	0
KY817961.1 Aquilaria crassna voucher CS-10 small subunit ribosomal RNA gene partial sequence internal transcribed spacer 1 5.8S ribosomal RNA gene and internal transcribed spacer 2 complete sequence and large subunit ribosomal RNA gene partial sequence	KY817948.1 Aquilaria crassna voucher TP-15 small subunit ribosomal RNA gene partial sequence internal transcribed spacer 1 5.8S ribosomal RNA gene and internal transcribed spacer 2 complete sequence and large subunit ribosomal RNA gene partial sequence	0	0
KY817959.1 Aquilaria crassna voucher CS-8 small subunit ribosomal RNA gene partial sequence internal transcribed spacer 1 5.8S ribosomal RNA gene and internal transcribed spacer 2 complete sequence and large subunit ribosomal RNA gene partial sequence	KY817948.1 Aquilaria crassna voucher TP-15 small subunit ribosomal RNA gene partial sequence internal transcribed spacer 1 5.8S ribosomal RNA gene and internal transcribed spacer 2 complete sequence and large subunit ribosomal RNA gene partial sequence	0	0
KY817958.1 Aquilaria crassna voucher CS-7 small subunit ribosomal RNA gene partial sequence internal transcribed spacer 1 5.8S ribosomal RNA gene and internal transcribed spacer 2 complete sequence and large subunit ribosomal RNA gene partial sequence	KY817948.1 Aquilaria crassna voucher TP-15 small subunit ribosomal RNA gene partial sequence internal transcribed spacer 1 5.8S ribosomal RNA gene and internal transcribed spacer 2 complete sequence and large subunit ribosomal RNA gene partial sequence	0	0
KY817957.1 Aquilaria crassna voucher CS-6 small subunit ribosomal RNA gene partial sequence internal transcribed spacer 1 5.8S ribosomal RNA gene and internal transcribed spacer 2 complete sequence and large subunit ribosomal RNA gene partial sequence	KY817948.1 Aquilaria crassna voucher TP-15 small subunit ribosomal RNA gene partial sequence internal transcribed spacer 1 5.8S ribosomal RNA gene and internal transcribed spacer 2 complete sequence and large subunit ribosomal RNA gene partial sequence	0	0
KY817953.1 Aquilaria crassna voucher CS-2 small subunit ribosomal RNA gene partial sequence internal transcribed spacer 1 5.8S ribosomal RNA gene and internal transcribed spacer 2 complete sequence and large subunit ribosomal RNA gene partial sequence	KY817948.1 Aquilaria crassna voucher TP-15 small subunit ribosomal RNA gene partial sequence internal transcribed spacer 1 5.8S ribosomal RNA gene and internal transcribed spacer 2 complete sequence and large subunit ribosomal RNA gene partial sequence	0	0
KY817951.1 Aquilaria crassna voucher TP-27 small subunit ribosomal RNA gene partial sequence internal transcribed spacer 1 5.8S ribosomal RNA gene and internal transcribed spacer 2 complete sequence and large subunit ribosomal RNA gene partial sequence	KY817948.1 Aquilaria crassna voucher TP-15 small subunit ribosomal RNA gene partial sequence internal transcribed spacer 1 5.8S ribosomal RNA gene and internal transcribed spacer 2 complete sequence and large subunit ribosomal RNA gene partial sequence	0	0
KY817950.1 Aquilaria crassna voucher TP-20 small subunit ribosomal RNA gene partial sequence internal transcribed spacer 1 5.8S ribosomal RNA gene and internal transcribed spacer 2 complete sequence and large subunit ribosomal RNA gene partial sequence	KY817948.1 Aquilaria crassna voucher TP-15 small subunit ribosomal RNA gene partial sequence internal transcribed spacer 1 5.8S ribosomal RNA gene and internal transcribed spacer 2 complete sequence and large subunit ribosomal RNA gene partial sequence	0	0
KY817949.1 Aquilaria crassna voucher TP-19 small subunit ribosomal RNA gene partial sequence internal transcribed spacer 1 5.8S ribosomal RNA gene and internal transcribed spacer 2 complete sequence and large subunit ribosomal RNA gene partial sequence	KY817948.1 Aquilaria crassna voucher TP-15 small subunit ribosomal RNA gene partial sequence internal transcribed spacer 1 5.8S ribosomal RNA gene and internal transcribed spacer 2 complete sequence and large subunit ribosomal RNA gene partial sequence	0	0
MH134137.1 Aquilaria agallochum internal transcribed spacer 1 partial sequence 5.8S ribosomal RNA gene complete sequence and internal transcribed spacer 2 partial sequence_{aga}	KY817947.1 Aquilaria crassna voucher TP-14 small subunit ribosomal RNA gene partial sequence internal transcribed spacer 1 5.8S ribosomal RNA gene and internal transcribed spacer 2 complete sequence and large subunit ribosomal RNA gene partial sequence	0.0165072	0.0059524
KU879012.1 Aquilaria agallochum 18S ribosomal RNA gene partial sequence internal transcribed spacer 1 5.8S ribosomal RNA gene and internal transcribed spacer 2 complete sequence and 28S ribosomal RNA gene partial sequence_{aga}	KY817947.1 Aquilaria crassna voucher TP-14 small subunit ribosomal RNA gene partial sequence internal transcribed spacer 1 5.8S ribosomal RNA gene and internal transcribed spacer 2 complete sequence and large subunit ribosomal RNA gene partial sequence	0.0221253	0.00719082
MH134138.1 Aquilaria beccariana internal transcribed spacer 1 partial sequence 5.8S ribosomal RNA gene complete sequence and internal transcribed spacer 2 partial sequence_{aga}	KY817947.1 Aquilaria crassna voucher TP-14 small subunit ribosomal RNA gene partial sequence internal transcribed spacer 1 5.8S ribosomal RNA gene and internal transcribed spacer 2 complete sequence and large subunit ribosomal RNA gene partial sequence	0.0220708	0.00727399
KT779116.1 Aquilaria beccariana voucher FBL04001 internal transcribed spacer 1 partial sequence 5.8S ribosomal RNA gene complete sequence and internal transcribed spacer 2 partial sequence_{aga}	KY817947.1 Aquilaria crassna voucher TP-14 small subunit ribosomal RNA gene partial sequence internal transcribed spacer 1 5.8S ribosomal RNA gene and internal transcribed spacer 2 complete sequence and large subunit ribosomal RNA gene partial sequence	0.0421308	0.0101917
KT364477.1 Aquilaria beccariana voucher SFN29381 internal transcribed spacer 1 partial sequence 5.8S ribosomal RNA gene complete sequence and internal transcribed spacer 2 partial sequence_{aga}	KY817947.1 Aquilaria crassna voucher TP-14 small subunit ribosomal RNA gene partial sequence internal transcribed spacer 1 5.8S ribosomal RNA gene and internal transcribed spacer 2 complete sequence and large subunit ribosomal RNA gene partial sequence	0.0221534	0.00722737
KX351419.1 Aquilaria beccariana voucher S1 5.8S ribosomal RNA gene partial sequence internal transcribed spacer 2 complete sequence and large subunit ribosomal RNA gene partial sequence_{aga}	KY817947.1 Aquilaria crassna voucher TP-14 small subunit ribosomal RNA gene partial sequence internal transcribed spacer 1 5.8S ribosomal RNA gene and internal transcribed spacer 2 complete sequence and large subunit ribosomal RNA gene partial sequence	0	0
KX424704.1 Aquilaria beccariana 5.8S ribosomal RNA gene partial sequence internal transcribed spacer 2 complete sequence and 28S ribosomal RNA gene partial sequence_{aga}	KY817947.1 Aquilaria crassna voucher TP-14 small subunit ribosomal RNA gene partial sequence internal transcribed spacer 1 5.8S ribosomal RNA gene and internal transcribed spacer 2 complete sequence and large subunit ribosomal RNA gene partial sequence	0.0438711	0.011062
KU238038.1 Aquilaria crassna voucher FBL G11 WC3 internal transcribed spacer 2 partial sequence	KY817947.1 Aquilaria crassna voucher TP-14 small subunit ribosomal RNA gene partial sequence internal transcribed spacer 1 5.8S ribosomal RNA gene and internal transcribed spacer 2 complete sequence and large subunit ribosomal RNA gene partial sequence	0	0
MH134139.1 Aquilaria crassna internal transcribed spacer 1 partial sequence 5.8S ribosomal RNA gene complete sequence and internal transcribed spacer 2 partial sequence	KY817947.1 Aquilaria crassna voucher TP-14 small subunit ribosomal RNA gene partial sequence internal transcribed spacer 1 5.8S ribosomal RNA gene and internal transcribed spacer 2 complete sequence and large subunit ribosomal RNA gene partial sequence	0	0
KU244111.1 Aquilaria crassna voucher FBL01017 internal transcribed spacer 2 partial sequence	KY817947.1 Aquilaria crassna voucher TP-14 small subunit ribosomal RNA gene partial sequence internal transcribed spacer 1 5.8S ribosomal RNA gene and internal transcribed spacer 2 complete sequence and large subunit ribosomal RNA gene partial sequence	0	0
KU244110.1 Aquilaria crassna voucher FBL01014 internal transcribed spacer 2 partial sequence	KY817947.1 Aquilaria crassna voucher TP-14 small subunit ribosomal RNA gene partial sequence internal transcribed spacer 1 5.8S ribosomal RNA gene and internal transcribed spacer 2 complete sequence and large subunit ribosomal RNA gene partial sequence	0	0
KU244109.1 Aquilaria crassna voucher FBL01013 internal transcribed spacer 2 partial sequence	KY817947.1 Aquilaria crassna voucher TP-14 small subunit ribosomal RNA gene partial sequence internal transcribed spacer 1 5.8S ribosomal RNA gene and internal transcribed spacer 2 complete sequence and large subunit ribosomal RNA gene partial sequence	0	0
KU244108.1 Aquilaria crassna voucher FBL01012 internal transcribed spacer 2 partial sequence	KY817947.1 Aquilaria crassna voucher TP-14 small subunit ribosomal RNA gene partial sequence internal transcribed spacer 1 5.8S ribosomal RNA gene and internal transcribed spacer 2 complete sequence and large subunit ribosomal RNA gene partial sequence	0	0
KU238037.1 Aquilaria crassna voucher FBL G10 WC2 internal transcribed spacer 2 partial sequence	KY817947.1 Aquilaria crassna voucher TP-14 small subunit ribosomal RNA gene partial sequence internal transcribed spacer 1 5.8S ribosomal RNA gene and internal transcribed spacer 2 complete sequence and large subunit ribosomal RNA gene partial sequence	0.0027248	0.00273681
KU238035.1 Aquilaria crassna voucher FBL G04 WC1 internal transcribed spacer 2 partial sequence	KY817947.1 Aquilaria crassna voucher TP-14 small subunit ribosomal RNA gene partial sequence internal transcribed spacer 1 5.8S ribosomal RNA gene and internal transcribed spacer 2 complete sequence and large subunit ribosomal RNA gene partial sequence	0.0027248	0.00273681
KU244085.1 Aquilaria crassna voucher FBL01017 internal transcribed spacer 1 partial sequence 5.8S ribosomal RNA gene complete sequence and internal transcribed spacer 2 partial sequence	KY817947.1 Aquilaria crassna voucher TP-14 small subunit ribosomal RNA gene partial sequence internal transcribed spacer 1 5.8S ribosomal RNA gene and internal transcribed spacer 2 complete sequence and large subunit ribosomal RNA gene partial sequence	0	0
KU244084.1 Aquilaria crassna voucher FBL01014 internal transcribed spacer 1 partial sequence 5.8S ribosomal RNA gene complete sequence and internal transcribed spacer 2 partial sequence	KY817947.1 Aquilaria crassna voucher TP-14 small subunit ribosomal RNA gene partial sequence internal transcribed spacer 1 5.8S ribosomal RNA gene and internal transcribed spacer 2 complete sequence and large subunit ribosomal RNA gene partial sequence	0	0
KU244083.1 Aquilaria crassna voucher FBL01013 internal transcribed spacer 1 partial sequence 5.8S ribosomal RNA gene complete sequence and internal transcribed spacer 2 partial sequence_{cra}	KY817947.1 Aquilaria crassna voucher TP-14 small subunit ribosomal RNA gene partial sequence internal transcribed spacer 1 5.8S ribosomal RNA gene and internal transcribed spacer 2 complete sequence and large subunit ribosomal RNA gene partial sequence	0	0
KU244082.1 Aquilaria crassna voucher FBL01012 internal transcribed spacer 1 partial sequence 5.8S ribosomal RNA gene complete sequence and internal transcribed spacer 2 partial sequence	KY817947.1 Aquilaria crassna voucher TP-14 small subunit ribosomal RNA gene partial sequence internal transcribed spacer 1 5.8S ribosomal RNA gene and internal transcribed spacer 2 complete sequence and large subunit ribosomal RNA gene partial sequence	0	0
KT364478.1 Aquilaria crassna voucher FBL01012 internal transcribed spacer 1 partial sequence 5.8S ribosomal RNA gene complete sequence and internal transcribed spacer 2 partial sequence	KY817947.1 Aquilaria crassna voucher TP-14 small subunit ribosomal RNA gene partial sequence internal transcribed spacer 1 5.8S ribosomal RNA gene and internal transcribed spacer 2 complete sequence and large subunit ribosomal RNA gene partial sequence	0	0
KY817982.1 Aquilaria crassna voucher S-9 small subunit ribosomal RNA gene partial sequence internal transcribed spacer 1 5.8S ribosomal RNA gene and internal transcribed spacer 2 complete sequence and large subunit ribosomal RNA gene partial sequence	KY817947.1 Aquilaria crassna voucher TP-14 small subunit ribosomal RNA gene partial sequence internal transcribed spacer 1 5.8S ribosomal RNA gene and internal transcribed spacer 2 complete sequence and large subunit ribosomal RNA gene partial sequence	0	0
KY817979.1 Aquilaria crassna voucher S-1 small subunit ribosomal RNA gene partial sequence internal transcribed spacer 1 5.8S ribosomal RNA gene and internal transcribed spacer 2 complete sequence and large subunit ribosomal RNA gene partial sequence	KY817947.1 Aquilaria crassna voucher TP-14 small subunit ribosomal RNA gene partial sequence internal transcribed spacer 1 5.8S ribosomal RNA gene and internal transcribed spacer 2 complete sequence and large subunit ribosomal RNA gene partial sequence	0	0
KY817973.1 Aquilaria crassna voucher ML-9 small subunit ribosomal RNA gene partial sequence internal transcribed spacer 1 5.8S ribosomal RNA gene and internal transcribed spacer 2 complete sequence and large subunit ribosomal RNA gene partial sequence	KY817947.1 Aquilaria crassna voucher TP-14 small subunit ribosomal RNA gene partial sequence internal transcribed spacer 1 5.8S ribosomal RNA gene and internal transcribed spacer 2 complete sequence and large subunit ribosomal RNA gene partial sequence	0	0
KY817972.1 Aquilaria crassna voucher ML-8 small subunit ribosomal RNA gene partial sequence internal transcribed spacer 1 5.8S ribosomal RNA gene and internal transcribed spacer 2 complete sequence and large subunit ribosomal RNA gene partial sequence	KY817947.1 Aquilaria crassna voucher TP-14 small subunit ribosomal RNA gene partial sequence internal transcribed spacer 1 5.8S ribosomal RNA gene and internal transcribed spacer 2 complete sequence and large subunit ribosomal RNA gene partial sequence	0	0
KY817971.1 Aquilaria crassna voucher ML-7 small subunit ribosomal RNA gene partial sequence internal transcribed spacer 1 5.8S ribosomal RNA gene and internal transcribed spacer 2 complete sequence and large subunit ribosomal RNA gene partial sequence	KY817947.1 Aquilaria crassna voucher TP-14 small subunit ribosomal RNA gene partial sequence internal transcribed spacer 1 5.8S ribosomal RNA gene and internal transcribed spacer 2 complete sequence and large subunit ribosomal RNA gene partial sequence	0	0
KY817970.1 Aquilaria crassna voucher ML-6 small subunit ribosomal RNA gene partial sequence internal transcribed spacer 1 5.8S ribosomal RNA gene and internal transcribed spacer 2 complete sequence and large subunit ribosomal RNA gene partial sequence	KY817947.1 Aquilaria crassna voucher TP-14 small subunit ribosomal RNA gene partial sequence internal transcribed spacer 1 5.8S ribosomal RNA gene and internal transcribed spacer 2 complete sequence and large subunit ribosomal RNA gene partial sequence	0	0
KY817969.1 Aquilaria crassna voucher ML-5 small subunit ribosomal RNA gene partial sequence internal transcribed spacer 1 5.8S ribosomal RNA gene and internal transcribed spacer 2 complete sequence and large subunit ribosomal RNA gene partial sequence	KY817947.1 Aquilaria crassna voucher TP-14 small subunit ribosomal RNA gene partial sequence internal transcribed spacer 1 5.8S ribosomal RNA gene and internal transcribed spacer 2 complete sequence and large subunit ribosomal RNA gene partial sequence	0	0
KY817968.1 Aquilaria crassna voucher ML-4 small subunit ribosomal RNA gene partial sequence internal transcribed spacer 1 5.8S ribosomal RNA gene and internal transcribed spacer 2 complete sequence and large subunit ribosomal RNA gene partial sequence	KY817947.1 Aquilaria crassna voucher TP-14 small subunit ribosomal RNA gene partial sequence internal transcribed spacer 1 5.8S ribosomal RNA gene and internal transcribed spacer 2 complete sequence and large subunit ribosomal RNA gene partial sequence	0	0
KY817967.1 Aquilaria crassna voucher ML-3 small subunit ribosomal RNA gene partial sequence internal transcribed spacer 1 5.8S ribosomal RNA gene and internal transcribed spacer 2 complete sequence and large subunit ribosomal RNA gene partial sequence	KY817947.1 Aquilaria crassna voucher TP-14 small subunit ribosomal RNA gene partial sequence internal transcribed spacer 1 5.8S ribosomal RNA gene and internal transcribed spacer 2 complete sequence and large subunit ribosomal RNA gene partial sequence	0	0
KY817964.1 Aquilaria crassna voucher CS-13 small subunit ribosomal RNA gene partial sequence internal transcribed spacer 1 5.8S ribosomal RNA gene and internal transcribed spacer 2 complete sequence and large subunit ribosomal RNA gene partial sequence	KY817947.1 Aquilaria crassna voucher TP-14 small subunit ribosomal RNA gene partial sequence internal transcribed spacer 1 5.8S ribosomal RNA gene and internal transcribed spacer 2 complete sequence and large subunit ribosomal RNA gene partial sequence	0	0
KY817963.1 Aquilaria crassna voucher CS-12 small subunit ribosomal RNA gene partial sequence internal transcribed spacer 1 5.8S ribosomal RNA gene and internal transcribed spacer 2 complete sequence and large subunit ribosomal RNA gene partial sequence	KY817947.1 Aquilaria crassna voucher TP-14 small subunit ribosomal RNA gene partial sequence internal transcribed spacer 1 5.8S ribosomal RNA gene and internal transcribed spacer 2 complete sequence and large subunit ribosomal RNA gene partial sequence	0	0
KY817962.1 Aquilaria crassna voucher CS-11 small subunit ribosomal RNA gene partial sequence internal transcribed spacer 1 5.8S ribosomal RNA gene and internal transcribed spacer 2 complete sequence and large subunit ribosomal RNA gene partial sequence	KY817947.1 Aquilaria crassna voucher TP-14 small subunit ribosomal RNA gene partial sequence internal transcribed spacer 1 5.8S ribosomal RNA gene and internal transcribed spacer 2 complete sequence and large subunit ribosomal RNA gene partial sequence	0	0
KY817961.1 Aquilaria crassna voucher CS-10 small subunit ribosomal RNA gene partial sequence internal transcribed spacer 1 5.8S ribosomal RNA gene and internal transcribed spacer 2 complete sequence and large subunit ribosomal RNA gene partial sequence	KY817947.1 Aquilaria crassna voucher TP-14 small subunit ribosomal RNA gene partial sequence internal transcribed spacer 1 5.8S ribosomal RNA gene and internal transcribed spacer 2 complete sequence and large subunit ribosomal RNA gene partial sequence	0	0
KY817959.1 Aquilaria crassna voucher CS-8 small subunit ribosomal RNA gene partial sequence internal transcribed spacer 1 5.8S ribosomal RNA gene and internal transcribed spacer 2 complete sequence and large subunit ribosomal RNA gene partial sequence	KY817947.1 Aquilaria crassna voucher TP-14 small subunit ribosomal RNA gene partial sequence internal transcribed spacer 1 5.8S ribosomal RNA gene and internal transcribed spacer 2 complete sequence and large subunit ribosomal RNA gene partial sequence	0	0
KY817958.1 Aquilaria crassna voucher CS-7 small subunit ribosomal RNA gene partial sequence internal transcribed spacer 1 5.8S ribosomal RNA gene and internal transcribed spacer 2 complete sequence and large subunit ribosomal RNA gene partial sequence	KY817947.1 Aquilaria crassna voucher TP-14 small subunit ribosomal RNA gene partial sequence internal transcribed spacer 1 5.8S ribosomal RNA gene and internal transcribed spacer 2 complete sequence and large subunit ribosomal RNA gene partial sequence	0	0
KY817957.1 Aquilaria crassna voucher CS-6 small subunit ribosomal RNA gene partial sequence internal transcribed spacer 1 5.8S ribosomal RNA gene and internal transcribed spacer 2 complete sequence and large subunit ribosomal RNA gene partial sequence	KY817947.1 Aquilaria crassna voucher TP-14 small subunit ribosomal RNA gene partial sequence internal transcribed spacer 1 5.8S ribosomal RNA gene and internal transcribed spacer 2 complete sequence and large subunit ribosomal RNA gene partial sequence	0	0
KY817953.1 Aquilaria crassna voucher CS-2 small subunit ribosomal RNA gene partial sequence internal transcribed spacer 1 5.8S ribosomal RNA gene and internal transcribed spacer 2 complete sequence and large subunit ribosomal RNA gene partial sequence	KY817947.1 Aquilaria crassna voucher TP-14 small subunit ribosomal RNA gene partial sequence internal transcribed spacer 1 5.8S ribosomal RNA gene and internal transcribed spacer 2 complete sequence and large subunit ribosomal RNA gene partial sequence	0	0
KY817951.1 Aquilaria crassna voucher TP-27 small subunit ribosomal RNA gene partial sequence internal transcribed spacer 1 5.8S ribosomal RNA gene and internal transcribed spacer 2 complete sequence and large subunit ribosomal RNA gene partial sequence	KY817947.1 Aquilaria crassna voucher TP-14 small subunit ribosomal RNA gene partial sequence internal transcribed spacer 1 5.8S ribosomal RNA gene and internal transcribed spacer 2 complete sequence and large subunit ribosomal RNA gene partial sequence	0	0
KY817950.1 Aquilaria crassna voucher TP-20 small subunit ribosomal RNA gene partial sequence internal transcribed spacer 1 5.8S ribosomal RNA gene and internal transcribed spacer 2 complete sequence and large subunit ribosomal RNA gene partial sequence	KY817947.1 Aquilaria crassna voucher TP-14 small subunit ribosomal RNA gene partial sequence internal transcribed spacer 1 5.8S ribosomal RNA gene and internal transcribed spacer 2 complete sequence and large subunit ribosomal RNA gene partial sequence	0	0
KY817949.1 Aquilaria crassna voucher TP-19 small subunit ribosomal RNA gene partial sequence internal transcribed spacer 1 5.8S ribosomal RNA gene and internal transcribed spacer 2 complete sequence and large subunit ribosomal RNA gene partial sequence	KY817947.1 Aquilaria crassna voucher TP-14 small subunit ribosomal RNA gene partial sequence internal transcribed spacer 1 5.8S ribosomal RNA gene and internal transcribed spacer 2 complete sequence and large subunit ribosomal RNA gene partial sequence	0	0
KY817948.1 Aquilaria crassna voucher TP-15 small subunit ribosomal RNA gene partial sequence internal transcribed spacer 1 5.8S ribosomal RNA gene and internal transcribed spacer 2 complete sequence and large subunit ribosomal RNA gene partial sequence	KY817947.1 Aquilaria crassna voucher TP-14 small subunit ribosomal RNA gene partial sequence internal transcribed spacer 1 5.8S ribosomal RNA gene and internal transcribed spacer 2 complete sequence and large subunit ribosomal RNA gene partial sequence	0	0
MH134137.1 Aquilaria agallochum internal transcribed spacer 1 partial sequence 5.8S ribosomal RNA gene complete sequence and internal transcribed spacer 2 partial sequence_{aga}	KY817946.1 Aquilaria crassna voucher TP-10 small subunit ribosomal RNA gene partial sequence internal transcribed spacer 1 5.8S ribosomal RNA gene and internal transcribed spacer 2 complete sequence and large subunit ribosomal RNA gene partial sequence	0.0165072	0.0059524
KU879012.1 Aquilaria agallochum 18S ribosomal RNA gene partial sequence internal transcribed spacer 1 5.8S ribosomal RNA gene and internal transcribed spacer 2 complete sequence and 28S ribosomal RNA gene partial sequence_{aga}	KY817946.1 Aquilaria crassna voucher TP-10 small subunit ribosomal RNA gene partial sequence internal transcribed spacer 1 5.8S ribosomal RNA gene and internal transcribed spacer 2 complete sequence and large subunit ribosomal RNA gene partial sequence	0.0221253	0.00719082
MH134138.1 Aquilaria beccariana internal transcribed spacer 1 partial sequence 5.8S ribosomal RNA gene complete sequence and internal transcribed spacer 2 partial sequence_{aga}	KY817946.1 Aquilaria crassna voucher TP-10 small subunit ribosomal RNA gene partial sequence internal transcribed spacer 1 5.8S ribosomal RNA gene and internal transcribed spacer 2 complete sequence and large subunit ribosomal RNA gene partial sequence	0.0220708	0.00727399
KT779116.1 Aquilaria beccariana voucher FBL04001 internal transcribed spacer 1 partial sequence 5.8S ribosomal RNA gene complete sequence and internal transcribed spacer 2 partial sequence_{aga}	KY817946.1 Aquilaria crassna voucher TP-10 small subunit ribosomal RNA gene partial sequence internal transcribed spacer 1 5.8S ribosomal RNA gene and internal transcribed spacer 2 complete sequence and large subunit ribosomal RNA gene partial sequence	0.0421308	0.0101917
KT364477.1 Aquilaria beccariana voucher SFN29381 internal transcribed spacer 1 partial sequence 5.8S ribosomal RNA gene complete sequence and internal transcribed spacer 2 partial sequence_{aga}	KY817946.1 Aquilaria crassna voucher TP-10 small subunit ribosomal RNA gene partial sequence internal transcribed spacer 1 5.8S ribosomal RNA gene and internal transcribed spacer 2 complete sequence and large subunit ribosomal RNA gene partial sequence	0.0221534	0.00722737
KX351419.1 Aquilaria beccariana voucher S1 5.8S ribosomal RNA gene partial sequence internal transcribed spacer 2 complete sequence and large subunit ribosomal RNA gene partial sequence_{aga}	KY817946.1 Aquilaria crassna voucher TP-10 small subunit ribosomal RNA gene partial sequence internal transcribed spacer 1 5.8S ribosomal RNA gene and internal transcribed spacer 2 complete sequence and large subunit ribosomal RNA gene partial sequence	0	0
KX424704.1 Aquilaria beccariana 5.8S ribosomal RNA gene partial sequence internal transcribed spacer 2 complete sequence and 28S ribosomal RNA gene partial sequence_{aga}	KY817946.1 Aquilaria crassna voucher TP-10 small subunit ribosomal RNA gene partial sequence internal transcribed spacer 1 5.8S ribosomal RNA gene and internal transcribed spacer 2 complete sequence and large subunit ribosomal RNA gene partial sequence	0.0438711	0.011062
KU238038.1 Aquilaria crassna voucher FBL G11 WC3 internal transcribed spacer 2 partial sequence	KY817946.1 Aquilaria crassna voucher TP-10 small subunit ribosomal RNA gene partial sequence internal transcribed spacer 1 5.8S ribosomal RNA gene and internal transcribed spacer 2 complete sequence and large subunit ribosomal RNA gene partial sequence	0	0
MH134139.1 Aquilaria crassna internal transcribed spacer 1 partial sequence 5.8S ribosomal RNA gene complete sequence and internal transcribed spacer 2 partial sequence	KY817946.1 Aquilaria crassna voucher TP-10 small subunit ribosomal RNA gene partial sequence internal transcribed spacer 1 5.8S ribosomal RNA gene and internal transcribed spacer 2 complete sequence and large subunit ribosomal RNA gene partial sequence	0	0
KU244111.1 Aquilaria crassna voucher FBL01017 internal transcribed spacer 2 partial sequence	KY817946.1 Aquilaria crassna voucher TP-10 small subunit ribosomal RNA gene partial sequence internal transcribed spacer 1 5.8S ribosomal RNA gene and internal transcribed spacer 2 complete sequence and large subunit ribosomal RNA gene partial sequence	0	0
KU244110.1 Aquilaria crassna voucher FBL01014 internal transcribed spacer 2 partial sequence	KY817946.1 Aquilaria crassna voucher TP-10 small subunit ribosomal RNA gene partial sequence internal transcribed spacer 1 5.8S ribosomal RNA gene and internal transcribed spacer 2 complete sequence and large subunit ribosomal RNA gene partial sequence	0	0
KU244109.1 Aquilaria crassna voucher FBL01013 internal transcribed spacer 2 partial sequence	KY817946.1 Aquilaria crassna voucher TP-10 small subunit ribosomal RNA gene partial sequence internal transcribed spacer 1 5.8S ribosomal RNA gene and internal transcribed spacer 2 complete sequence and large subunit ribosomal RNA gene partial sequence	0	0
KU244108.1 Aquilaria crassna voucher FBL01012 internal transcribed spacer 2 partial sequence	KY817946.1 Aquilaria crassna voucher TP-10 small subunit ribosomal RNA gene partial sequence internal transcribed spacer 1 5.8S ribosomal RNA gene and internal transcribed spacer 2 complete sequence and large subunit ribosomal RNA gene partial sequence	0	0
KU238037.1 Aquilaria crassna voucher FBL G10 WC2 internal transcribed spacer 2 partial sequence	KY817946.1 Aquilaria crassna voucher TP-10 small subunit ribosomal RNA gene partial sequence internal transcribed spacer 1 5.8S ribosomal RNA gene and internal transcribed spacer 2 complete sequence and large subunit ribosomal RNA gene partial sequence	0.0027248	0.00273681
KU238035.1 Aquilaria crassna voucher FBL G04 WC1 internal transcribed spacer 2 partial sequence	KY817946.1 Aquilaria crassna voucher TP-10 small subunit ribosomal RNA gene partial sequence internal transcribed spacer 1 5.8S ribosomal RNA gene and internal transcribed spacer 2 complete sequence and large subunit ribosomal RNA gene partial sequence	0.0027248	0.00273681
KU244085.1 Aquilaria crassna voucher FBL01017 internal transcribed spacer 1 partial sequence 5.8S ribosomal RNA gene complete sequence and internal transcribed spacer 2 partial sequence	KY817946.1 Aquilaria crassna voucher TP-10 small subunit ribosomal RNA gene partial sequence internal transcribed spacer 1 5.8S ribosomal RNA gene and internal transcribed spacer 2 complete sequence and large subunit ribosomal RNA gene partial sequence	0	0
KU244084.1 Aquilaria crassna voucher FBL01014 internal transcribed spacer 1 partial sequence 5.8S ribosomal RNA gene complete sequence and internal transcribed spacer 2 partial sequence	KY817946.1 Aquilaria crassna voucher TP-10 small subunit ribosomal RNA gene partial sequence internal transcribed spacer 1 5.8S ribosomal RNA gene and internal transcribed spacer 2 complete sequence and large subunit ribosomal RNA gene partial sequence	0	0
KU244083.1 Aquilaria crassna voucher FBL01013 internal transcribed spacer 1 partial sequence 5.8S ribosomal RNA gene complete sequence and internal transcribed spacer 2 partial sequence_{cra}	KY817946.1 Aquilaria crassna voucher TP-10 small subunit ribosomal RNA gene partial sequence internal transcribed spacer 1 5.8S ribosomal RNA gene and internal transcribed spacer 2 complete sequence and large subunit ribosomal RNA gene partial sequence	0	0
KU244082.1 Aquilaria crassna voucher FBL01012 internal transcribed spacer 1 partial sequence 5.8S ribosomal RNA gene complete sequence and internal transcribed spacer 2 partial sequence	KY817946.1 Aquilaria crassna voucher TP-10 small subunit ribosomal RNA gene partial sequence internal transcribed spacer 1 5.8S ribosomal RNA gene and internal transcribed spacer 2 complete sequence and large subunit ribosomal RNA gene partial sequence	0	0
KT364478.1 Aquilaria crassna voucher FBL01012 internal transcribed spacer 1 partial sequence 5.8S ribosomal RNA gene complete sequence and internal transcribed spacer 2 partial sequence	KY817946.1 Aquilaria crassna voucher TP-10 small subunit ribosomal RNA gene partial sequence internal transcribed spacer 1 5.8S ribosomal RNA gene and internal transcribed spacer 2 complete sequence and large subunit ribosomal RNA gene partial sequence	0	0
KY817982.1 Aquilaria crassna voucher S-9 small subunit ribosomal RNA gene partial sequence internal transcribed spacer 1 5.8S ribosomal RNA gene and internal transcribed spacer 2 complete sequence and large subunit ribosomal RNA gene partial sequence	KY817946.1 Aquilaria crassna voucher TP-10 small subunit ribosomal RNA gene partial sequence internal transcribed spacer 1 5.8S ribosomal RNA gene and internal transcribed spacer 2 complete sequence and large subunit ribosomal RNA gene partial sequence	0	0
KY817979.1 Aquilaria crassna voucher S-1 small subunit ribosomal RNA gene partial sequence internal transcribed spacer 1 5.8S ribosomal RNA gene and internal transcribed spacer 2 complete sequence and large subunit ribosomal RNA gene partial sequence	KY817946.1 Aquilaria crassna voucher TP-10 small subunit ribosomal RNA gene partial sequence internal transcribed spacer 1 5.8S ribosomal RNA gene and internal transcribed spacer 2 complete sequence and large subunit ribosomal RNA gene partial sequence	0	0
KY817973.1 Aquilaria crassna voucher ML-9 small subunit ribosomal RNA gene partial sequence internal transcribed spacer 1 5.8S ribosomal RNA gene and internal transcribed spacer 2 complete sequence and large subunit ribosomal RNA gene partial sequence	KY817946.1 Aquilaria crassna voucher TP-10 small subunit ribosomal RNA gene partial sequence internal transcribed spacer 1 5.8S ribosomal RNA gene and internal transcribed spacer 2 complete sequence and large subunit ribosomal RNA gene partial sequence	0	0
KY817972.1 Aquilaria crassna voucher ML-8 small subunit ribosomal RNA gene partial sequence internal transcribed spacer 1 5.8S ribosomal RNA gene and internal transcribed spacer 2 complete sequence and large subunit ribosomal RNA gene partial sequence	KY817946.1 Aquilaria crassna voucher TP-10 small subunit ribosomal RNA gene partial sequence internal transcribed spacer 1 5.8S ribosomal RNA gene and internal transcribed spacer 2 complete sequence and large subunit ribosomal RNA gene partial sequence	0	0
KY817971.1 Aquilaria crassna voucher ML-7 small subunit ribosomal RNA gene partial sequence internal transcribed spacer 1 5.8S ribosomal RNA gene and internal transcribed spacer 2 complete sequence and large subunit ribosomal RNA gene partial sequence	KY817946.1 Aquilaria crassna voucher TP-10 small subunit ribosomal RNA gene partial sequence internal transcribed spacer 1 5.8S ribosomal RNA gene and internal transcribed spacer 2 complete sequence and large subunit ribosomal RNA gene partial sequence	0	0
KY817970.1 Aquilaria crassna voucher ML-6 small subunit ribosomal RNA gene partial sequence internal transcribed spacer 1 5.8S ribosomal RNA gene and internal transcribed spacer 2 complete sequence and large subunit ribosomal RNA gene partial sequence	KY817946.1 Aquilaria crassna voucher TP-10 small subunit ribosomal RNA gene partial sequence internal transcribed spacer 1 5.8S ribosomal RNA gene and internal transcribed spacer 2 complete sequence and large subunit ribosomal RNA gene partial sequence	0	0
KY817969.1 Aquilaria crassna voucher ML-5 small subunit ribosomal RNA gene partial sequence internal transcribed spacer 1 5.8S ribosomal RNA gene and internal transcribed spacer 2 complete sequence and large subunit ribosomal RNA gene partial sequence	KY817946.1 Aquilaria crassna voucher TP-10 small subunit ribosomal RNA gene partial sequence internal transcribed spacer 1 5.8S ribosomal RNA gene and internal transcribed spacer 2 complete sequence and large subunit ribosomal RNA gene partial sequence	0	0
KY817968.1 Aquilaria crassna voucher ML-4 small subunit ribosomal RNA gene partial sequence internal transcribed spacer 1 5.8S ribosomal RNA gene and internal transcribed spacer 2 complete sequence and large subunit ribosomal RNA gene partial sequence	KY817946.1 Aquilaria crassna voucher TP-10 small subunit ribosomal RNA gene partial sequence internal transcribed spacer 1 5.8S ribosomal RNA gene and internal transcribed spacer 2 complete sequence and large subunit ribosomal RNA gene partial sequence	0	0
KY817967.1 Aquilaria crassna voucher ML-3 small subunit ribosomal RNA gene partial sequence internal transcribed spacer 1 5.8S ribosomal RNA gene and internal transcribed spacer 2 complete sequence and large subunit ribosomal RNA gene partial sequence	KY817946.1 Aquilaria crassna voucher TP-10 small subunit ribosomal RNA gene partial sequence internal transcribed spacer 1 5.8S ribosomal RNA gene and internal transcribed spacer 2 complete sequence and large subunit ribosomal RNA gene partial sequence	0	0
KY817964.1 Aquilaria crassna voucher CS-13 small subunit ribosomal RNA gene partial sequence internal transcribed spacer 1 5.8S ribosomal RNA gene and internal transcribed spacer 2 complete sequence and large subunit ribosomal RNA gene partial sequence	KY817946.1 Aquilaria crassna voucher TP-10 small subunit ribosomal RNA gene partial sequence internal transcribed spacer 1 5.8S ribosomal RNA gene and internal transcribed spacer 2 complete sequence and large subunit ribosomal RNA gene partial sequence	0	0
KY817963.1 Aquilaria crassna voucher CS-12 small subunit ribosomal RNA gene partial sequence internal transcribed spacer 1 5.8S ribosomal RNA gene and internal transcribed spacer 2 complete sequence and large subunit ribosomal RNA gene partial sequence	KY817946.1 Aquilaria crassna voucher TP-10 small subunit ribosomal RNA gene partial sequence internal transcribed spacer 1 5.8S ribosomal RNA gene and internal transcribed spacer 2 complete sequence and large subunit ribosomal RNA gene partial sequence	0	0
KY817962.1 Aquilaria crassna voucher CS-11 small subunit ribosomal RNA gene partial sequence internal transcribed spacer 1 5.8S ribosomal RNA gene and internal transcribed spacer 2 complete sequence and large subunit ribosomal RNA gene partial sequence	KY817946.1 Aquilaria crassna voucher TP-10 small subunit ribosomal RNA gene partial sequence internal transcribed spacer 1 5.8S ribosomal RNA gene and internal transcribed spacer 2 complete sequence and large subunit ribosomal RNA gene partial sequence	0	0
KY817961.1 Aquilaria crassna voucher CS-10 small subunit ribosomal RNA gene partial sequence internal transcribed spacer 1 5.8S ribosomal RNA gene and internal transcribed spacer 2 complete sequence and large subunit ribosomal RNA gene partial sequence	KY817946.1 Aquilaria crassna voucher TP-10 small subunit ribosomal RNA gene partial sequence internal transcribed spacer 1 5.8S ribosomal RNA gene and internal transcribed spacer 2 complete sequence and large subunit ribosomal RNA gene partial sequence	0	0
KY817959.1 Aquilaria crassna voucher CS-8 small subunit ribosomal RNA gene partial sequence internal transcribed spacer 1 5.8S ribosomal RNA gene and internal transcribed spacer 2 complete sequence and large subunit ribosomal RNA gene partial sequence	KY817946.1 Aquilaria crassna voucher TP-10 small subunit ribosomal RNA gene partial sequence internal transcribed spacer 1 5.8S ribosomal RNA gene and internal transcribed spacer 2 complete sequence and large subunit ribosomal RNA gene partial sequence	0	0
KY817958.1 Aquilaria crassna voucher CS-7 small subunit ribosomal RNA gene partial sequence internal transcribed spacer 1 5.8S ribosomal RNA gene and internal transcribed spacer 2 complete sequence and large subunit ribosomal RNA gene partial sequence	KY817946.1 Aquilaria crassna voucher TP-10 small subunit ribosomal RNA gene partial sequence internal transcribed spacer 1 5.8S ribosomal RNA gene and internal transcribed spacer 2 complete sequence and large subunit ribosomal RNA gene partial sequence	0	0
KY817957.1 Aquilaria crassna voucher CS-6 small subunit ribosomal RNA gene partial sequence internal transcribed spacer 1 5.8S ribosomal RNA gene and internal transcribed spacer 2 complete sequence and large subunit ribosomal RNA gene partial sequence	KY817946.1 Aquilaria crassna voucher TP-10 small subunit ribosomal RNA gene partial sequence internal transcribed spacer 1 5.8S ribosomal RNA gene and internal transcribed spacer 2 complete sequence and large subunit ribosomal RNA gene partial sequence	0	0
KY817953.1 Aquilaria crassna voucher CS-2 small subunit ribosomal RNA gene partial sequence internal transcribed spacer 1 5.8S ribosomal RNA gene and internal transcribed spacer 2 complete sequence and large subunit ribosomal RNA gene partial sequence	KY817946.1 Aquilaria crassna voucher TP-10 small subunit ribosomal RNA gene partial sequence internal transcribed spacer 1 5.8S ribosomal RNA gene and internal transcribed spacer 2 complete sequence and large subunit ribosomal RNA gene partial sequence	0	0
KY817951.1 Aquilaria crassna voucher TP-27 small subunit ribosomal RNA gene partial sequence internal transcribed spacer 1 5.8S ribosomal RNA gene and internal transcribed spacer 2 complete sequence and large subunit ribosomal RNA gene partial sequence	KY817946.1 Aquilaria crassna voucher TP-10 small subunit ribosomal RNA gene partial sequence internal transcribed spacer 1 5.8S ribosomal RNA gene and internal transcribed spacer 2 complete sequence and large subunit ribosomal RNA gene partial sequence	0	0
KY817950.1 Aquilaria crassna voucher TP-20 small subunit ribosomal RNA gene partial sequence internal transcribed spacer 1 5.8S ribosomal RNA gene and internal transcribed spacer 2 complete sequence and large subunit ribosomal RNA gene partial sequence	KY817946.1 Aquilaria crassna voucher TP-10 small subunit ribosomal RNA gene partial sequence internal transcribed spacer 1 5.8S ribosomal RNA gene and internal transcribed spacer 2 complete sequence and large subunit ribosomal RNA gene partial sequence	0	0
KY817949.1 Aquilaria crassna voucher TP-19 small subunit ribosomal RNA gene partial sequence internal transcribed spacer 1 5.8S ribosomal RNA gene and internal transcribed spacer 2 complete sequence and large subunit ribosomal RNA gene partial sequence	KY817946.1 Aquilaria crassna voucher TP-10 small subunit ribosomal RNA gene partial sequence internal transcribed spacer 1 5.8S ribosomal RNA gene and internal transcribed spacer 2 complete sequence and large subunit ribosomal RNA gene partial sequence	0	0
KY817948.1 Aquilaria crassna voucher TP-15 small subunit ribosomal RNA gene partial sequence internal transcribed spacer 1 5.8S ribosomal RNA gene and internal transcribed spacer 2 complete sequence and large subunit ribosomal RNA gene partial sequence	KY817946.1 Aquilaria crassna voucher TP-10 small subunit ribosomal RNA gene partial sequence internal transcribed spacer 1 5.8S ribosomal RNA gene and internal transcribed spacer 2 complete sequence and large subunit ribosomal RNA gene partial sequence	0	0
KY817947.1 Aquilaria crassna voucher TP-14 small subunit ribosomal RNA gene partial sequence internal transcribed spacer 1 5.8S ribosomal RNA gene and internal transcribed spacer 2 complete sequence and large subunit ribosomal RNA gene partial sequence	KY817946.1 Aquilaria crassna voucher TP-10 small subunit ribosomal RNA gene partial sequence internal transcribed spacer 1 5.8S ribosomal RNA gene and internal transcribed spacer 2 complete sequence and large subunit ribosomal RNA gene partial sequence	0	0
MH134137.1 Aquilaria agallochum internal transcribed spacer 1 partial sequence 5.8S ribosomal RNA gene complete sequence and internal transcribed spacer 2 partial sequence_{aga}	KY817945.1 Aquilaria crassna voucher TP-2 small subunit ribosomal RNA gene partial sequence internal transcribed spacer 1 5.8S ribosomal RNA gene and internal transcribed spacer 2 complete sequence and large subunit ribosomal RNA gene partial sequence	0.0165072	0.0059524
KU879012.1 Aquilaria agallochum 18S ribosomal RNA gene partial sequence internal transcribed spacer 1 5.8S ribosomal RNA gene and internal transcribed spacer 2 complete sequence and 28S ribosomal RNA gene partial sequence_{aga}	KY817945.1 Aquilaria crassna voucher TP-2 small subunit ribosomal RNA gene partial sequence internal transcribed spacer 1 5.8S ribosomal RNA gene and internal transcribed spacer 2 complete sequence and large subunit ribosomal RNA gene partial sequence	0.0221253	0.00719082
MH134138.1 Aquilaria beccariana internal transcribed spacer 1 partial sequence 5.8S ribosomal RNA gene complete sequence and internal transcribed spacer 2 partial sequence_{aga}	KY817945.1 Aquilaria crassna voucher TP-2 small subunit ribosomal RNA gene partial sequence internal transcribed spacer 1 5.8S ribosomal RNA gene and internal transcribed spacer 2 complete sequence and large subunit ribosomal RNA gene partial sequence	0.0220708	0.00727399
KT779116.1 Aquilaria beccariana voucher FBL04001 internal transcribed spacer 1 partial sequence 5.8S ribosomal RNA gene complete sequence and internal transcribed spacer 2 partial sequence_{aga}	KY817945.1 Aquilaria crassna voucher TP-2 small subunit ribosomal RNA gene partial sequence internal transcribed spacer 1 5.8S ribosomal RNA gene and internal transcribed spacer 2 complete sequence and large subunit ribosomal RNA gene partial sequence	0.0421308	0.0101917
KT364477.1 Aquilaria beccariana voucher SFN29381 internal transcribed spacer 1 partial sequence 5.8S ribosomal RNA gene complete sequence and internal transcribed spacer 2 partial sequence_{aga}	KY817945.1 Aquilaria crassna voucher TP-2 small subunit ribosomal RNA gene partial sequence internal transcribed spacer 1 5.8S ribosomal RNA gene and internal transcribed spacer 2 complete sequence and large subunit ribosomal RNA gene partial sequence	0.0221534	0.00722737
KX351419.1 Aquilaria beccariana voucher S1 5.8S ribosomal RNA gene partial sequence internal transcribed spacer 2 complete sequence and large subunit ribosomal RNA gene partial sequence_{aga}	KY817945.1 Aquilaria crassna voucher TP-2 small subunit ribosomal RNA gene partial sequence internal transcribed spacer 1 5.8S ribosomal RNA gene and internal transcribed spacer 2 complete sequence and large subunit ribosomal RNA gene partial sequence	0	0
KX424704.1 Aquilaria beccariana 5.8S ribosomal RNA gene partial sequence internal transcribed spacer 2 complete sequence and 28S ribosomal RNA gene partial sequence_{aga}	KY817945.1 Aquilaria crassna voucher TP-2 small subunit ribosomal RNA gene partial sequence internal transcribed spacer 1 5.8S ribosomal RNA gene and internal transcribed spacer 2 complete sequence and large subunit ribosomal RNA gene partial sequence	0.0438711	0.011062
KU238038.1 Aquilaria crassna voucher FBL G11 WC3 internal transcribed spacer 2 partial sequence	KY817945.1 Aquilaria crassna voucher TP-2 small subunit ribosomal RNA gene partial sequence internal transcribed spacer 1 5.8S ribosomal RNA gene and internal transcribed spacer 2 complete sequence and large subunit ribosomal RNA gene partial sequence	0	0
MH134139.1 Aquilaria crassna internal transcribed spacer 1 partial sequence 5.8S ribosomal RNA gene complete sequence and internal transcribed spacer 2 partial sequence	KY817945.1 Aquilaria crassna voucher TP-2 small subunit ribosomal RNA gene partial sequence internal transcribed spacer 1 5.8S ribosomal RNA gene and internal transcribed spacer 2 complete sequence and large subunit ribosomal RNA gene partial sequence	0	0
KU244111.1 Aquilaria crassna voucher FBL01017 internal transcribed spacer 2 partial sequence	KY817945.1 Aquilaria crassna voucher TP-2 small subunit ribosomal RNA gene partial sequence internal transcribed spacer 1 5.8S ribosomal RNA gene and internal transcribed spacer 2 complete sequence and large subunit ribosomal RNA gene partial sequence	0	0
KU244110.1 Aquilaria crassna voucher FBL01014 internal transcribed spacer 2 partial sequence	KY817945.1 Aquilaria crassna voucher TP-2 small subunit ribosomal RNA gene partial sequence internal transcribed spacer 1 5.8S ribosomal RNA gene and internal transcribed spacer 2 complete sequence and large subunit ribosomal RNA gene partial sequence	0	0
KU244109.1 Aquilaria crassna voucher FBL01013 internal transcribed spacer 2 partial sequence	KY817945.1 Aquilaria crassna voucher TP-2 small subunit ribosomal RNA gene partial sequence internal transcribed spacer 1 5.8S ribosomal RNA gene and internal transcribed spacer 2 complete sequence and large subunit ribosomal RNA gene partial sequence	0	0
KU244108.1 Aquilaria crassna voucher FBL01012 internal transcribed spacer 2 partial sequence	KY817945.1 Aquilaria crassna voucher TP-2 small subunit ribosomal RNA gene partial sequence internal transcribed spacer 1 5.8S ribosomal RNA gene and internal transcribed spacer 2 complete sequence and large subunit ribosomal RNA gene partial sequence	0	0
KU238037.1 Aquilaria crassna voucher FBL G10 WC2 internal transcribed spacer 2 partial sequence	KY817945.1 Aquilaria crassna voucher TP-2 small subunit ribosomal RNA gene partial sequence internal transcribed spacer 1 5.8S ribosomal RNA gene and internal transcribed spacer 2 complete sequence and large subunit ribosomal RNA gene partial sequence	0.0027248	0.00273681
KU238035.1 Aquilaria crassna voucher FBL G04 WC1 internal transcribed spacer 2 partial sequence	KY817945.1 Aquilaria crassna voucher TP-2 small subunit ribosomal RNA gene partial sequence internal transcribed spacer 1 5.8S ribosomal RNA gene and internal transcribed spacer 2 complete sequence and large subunit ribosomal RNA gene partial sequence	0.0027248	0.00273681
KU244085.1 Aquilaria crassna voucher FBL01017 internal transcribed spacer 1 partial sequence 5.8S ribosomal RNA gene complete sequence and internal transcribed spacer 2 partial sequence	KY817945.1 Aquilaria crassna voucher TP-2 small subunit ribosomal RNA gene partial sequence internal transcribed spacer 1 5.8S ribosomal RNA gene and internal transcribed spacer 2 complete sequence and large subunit ribosomal RNA gene partial sequence	0	0
KU244084.1 Aquilaria crassna voucher FBL01014 internal transcribed spacer 1 partial sequence 5.8S ribosomal RNA gene complete sequence and internal transcribed spacer 2 partial sequence	KY817945.1 Aquilaria crassna voucher TP-2 small subunit ribosomal RNA gene partial sequence internal transcribed spacer 1 5.8S ribosomal RNA gene and internal transcribed spacer 2 complete sequence and large subunit ribosomal RNA gene partial sequence	0	0
KU244083.1 Aquilaria crassna voucher FBL01013 internal transcribed spacer 1 partial sequence 5.8S ribosomal RNA gene complete sequence and internal transcribed spacer 2 partial sequence_{cra}	KY817945.1 Aquilaria crassna voucher TP-2 small subunit ribosomal RNA gene partial sequence internal transcribed spacer 1 5.8S ribosomal RNA gene and internal transcribed spacer 2 complete sequence and large subunit ribosomal RNA gene partial sequence	0	0
KU244082.1 Aquilaria crassna voucher FBL01012 internal transcribed spacer 1 partial sequence 5.8S ribosomal RNA gene complete sequence and internal transcribed spacer 2 partial sequence	KY817945.1 Aquilaria crassna voucher TP-2 small subunit ribosomal RNA gene partial sequence internal transcribed spacer 1 5.8S ribosomal RNA gene and internal transcribed spacer 2 complete sequence and large subunit ribosomal RNA gene partial sequence	0	0
KT364478.1 Aquilaria crassna voucher FBL01012 internal transcribed spacer 1 partial sequence 5.8S ribosomal RNA gene complete sequence and internal transcribed spacer 2 partial sequence	KY817945.1 Aquilaria crassna voucher TP-2 small subunit ribosomal RNA gene partial sequence internal transcribed spacer 1 5.8S ribosomal RNA gene and internal transcribed spacer 2 complete sequence and large subunit ribosomal RNA gene partial sequence	0	0
KY817982.1 Aquilaria crassna voucher S-9 small subunit ribosomal RNA gene partial sequence internal transcribed spacer 1 5.8S ribosomal RNA gene and internal transcribed spacer 2 complete sequence and large subunit ribosomal RNA gene partial sequence	KY817945.1 Aquilaria crassna voucher TP-2 small subunit ribosomal RNA gene partial sequence internal transcribed spacer 1 5.8S ribosomal RNA gene and internal transcribed spacer 2 complete sequence and large subunit ribosomal RNA gene partial sequence	0	0
KY817979.1 Aquilaria crassna voucher S-1 small subunit ribosomal RNA gene partial sequence internal transcribed spacer 1 5.8S ribosomal RNA gene and internal transcribed spacer 2 complete sequence and large subunit ribosomal RNA gene partial sequence	KY817945.1 Aquilaria crassna voucher TP-2 small subunit ribosomal RNA gene partial sequence internal transcribed spacer 1 5.8S ribosomal RNA gene and internal transcribed spacer 2 complete sequence and large subunit ribosomal RNA gene partial sequence	0	0
KY817973.1 Aquilaria crassna voucher ML-9 small subunit ribosomal RNA gene partial sequence internal transcribed spacer 1 5.8S ribosomal RNA gene and internal transcribed spacer 2 complete sequence and large subunit ribosomal RNA gene partial sequence	KY817945.1 Aquilaria crassna voucher TP-2 small subunit ribosomal RNA gene partial sequence internal transcribed spacer 1 5.8S ribosomal RNA gene and internal transcribed spacer 2 complete sequence and large subunit ribosomal RNA gene partial sequence	0	0
KY817972.1 Aquilaria crassna voucher ML-8 small subunit ribosomal RNA gene partial sequence internal transcribed spacer 1 5.8S ribosomal RNA gene and internal transcribed spacer 2 complete sequence and large subunit ribosomal RNA gene partial sequence	KY817945.1 Aquilaria crassna voucher TP-2 small subunit ribosomal RNA gene partial sequence internal transcribed spacer 1 5.8S ribosomal RNA gene and internal transcribed spacer 2 complete sequence and large subunit ribosomal RNA gene partial sequence	0	0
KY817971.1 Aquilaria crassna voucher ML-7 small subunit ribosomal RNA gene partial sequence internal transcribed spacer 1 5.8S ribosomal RNA gene and internal transcribed spacer 2 complete sequence and large subunit ribosomal RNA gene partial sequence	KY817945.1 Aquilaria crassna voucher TP-2 small subunit ribosomal RNA gene partial sequence internal transcribed spacer 1 5.8S ribosomal RNA gene and internal transcribed spacer 2 complete sequence and large subunit ribosomal RNA gene partial sequence	0	0
KY817970.1 Aquilaria crassna voucher ML-6 small subunit ribosomal RNA gene partial sequence internal transcribed spacer 1 5.8S ribosomal RNA gene and internal transcribed spacer 2 complete sequence and large subunit ribosomal RNA gene partial sequence	KY817945.1 Aquilaria crassna voucher TP-2 small subunit ribosomal RNA gene partial sequence internal transcribed spacer 1 5.8S ribosomal RNA gene and internal transcribed spacer 2 complete sequence and large subunit ribosomal RNA gene partial sequence	0	0
KY817969.1 Aquilaria crassna voucher ML-5 small subunit ribosomal RNA gene partial sequence internal transcribed spacer 1 5.8S ribosomal RNA gene and internal transcribed spacer 2 complete sequence and large subunit ribosomal RNA gene partial sequence	KY817945.1 Aquilaria crassna voucher TP-2 small subunit ribosomal RNA gene partial sequence internal transcribed spacer 1 5.8S ribosomal RNA gene and internal transcribed spacer 2 complete sequence and large subunit ribosomal RNA gene partial sequence	0	0
KY817968.1 Aquilaria crassna voucher ML-4 small subunit ribosomal RNA gene partial sequence internal transcribed spacer 1 5.8S ribosomal RNA gene and internal transcribed spacer 2 complete sequence and large subunit ribosomal RNA gene partial sequence	KY817945.1 Aquilaria crassna voucher TP-2 small subunit ribosomal RNA gene partial sequence internal transcribed spacer 1 5.8S ribosomal RNA gene and internal transcribed spacer 2 complete sequence and large subunit ribosomal RNA gene partial sequence	0	0
KY817967.1 Aquilaria crassna voucher ML-3 small subunit ribosomal RNA gene partial sequence internal transcribed spacer 1 5.8S ribosomal RNA gene and internal transcribed spacer 2 complete sequence and large subunit ribosomal RNA gene partial sequence	KY817945.1 Aquilaria crassna voucher TP-2 small subunit ribosomal RNA gene partial sequence internal transcribed spacer 1 5.8S ribosomal RNA gene and internal transcribed spacer 2 complete sequence and large subunit ribosomal RNA gene partial sequence	0	0
[truncated: 10,849 more rows]

## Sheet: Table S2
Table S2. Genetic distance calculation results based on matK DNA molecular markers among different Aquilaria species.
[truncated: 3,487 more rows]

[truncated: 11 more sheets: Table S3, Table S4, Table S5, Table S6, Table S7, Table S8, Table S9, Table S10, Table S11, Table S12, Table S13]
